# Supplementary material for: The global epidemiology of hepatitis E virus infection: A systematic review and meta‐analysis
Source: PubMed Central journal article supplement (PMC7384095; doi:10.1111/liv.14468), 2020-04-24
Supplement: LIV-40-1516-s001.pdf [file LIV-40-1516-s001.pdf]

## Supplementary information to:

### The global epidemiology of hepatitis E virus infection: a systematic review and meta-analysis

#### *Supplementary Materials*

#### Table of Contents

Supplementary method 1. Searching strategy for prevalence and burden of hepatitis E virus (HEV) infection in the global population. (page 4-5)

Figure S1. Forest plot of estimated pooled anti-HEV IgG seroprevalence among general population based on different countries. (page 6-11)

Figure S2. Forest plot of estimated pooled anti-HEV IgM seroprevalence among general population based on different countries. (page 12-14)

Figure S3. Forest plot of estimated pooled HEV RNA positive rate among general population based on different countries. (page 15-16)

Figure S4. Forest plot of estimated pooled anti-HEV IgG seroprevalence among general population based on different continents. (page 17-20)

Figure S5. Forest plot of estimated pooled anti-HEV IgM seroprevalence among general population based on different continents. (page 21-22)

Figure S6. Forest plot of estimated pooled HEV RNA positive rate among general population based on different continents. (page 23)

Figure S7. Forest plot of estimated pooled anti-HEV IgG seroprevalence among general population based on different ages. (page 24-28)

Figure S8. Anti-HEV IgG seroprevalence among different age range for general population from different continents. (page 29)

Figure S9. Forest plot of estimated pooled anti-HEV IgG seroprevalence among general population based on different genders. (page 30-33)

Figure S10. Forest plot of estimated pooled anti-HEV IgG seroprevalence among general population based on high income countries, upper-middle income countries, lower middle income countries, and low income countries. (page 34-37)

Figure S11. Forest plot of estimated pooled anti-HEV IgG seroprevalence among general population based on developed countries and developing countries. (page 38-41)

Figure S12. Forest plot of estimated pooled anti-HEV IgG seroprevalence among general population based on time period of 1993-2006 and 2007-2019. (page 42-45)

Figure S13. Forest plot of estimated pooled anti-HEV IgG seroprevalence among swine-related occupational population based on different countries. (page 46-47)

Figure S14. Forest plot of estimated pooled anti-HEV IgG seroprevalence among special population. (page 48-49)

Figure S15. Forest plot of estimated pooled anti-HEV IgM seroprevalence among special population. (page 50)

Figure S16. Forest plot of estimated pooled HEV RNA positive rate among special population. (page 51)

Figure S17. Forest plot of estimated pooled seroprevalence of anti-HEV IgG among hepatitis population. (page 52)

Figure S18. Forest plot of estimated pooled seroprevalence of anti-HEV IgM among hepatitis population. (page 53)

Figure S19. Forest plot of estimated pooled HEV RNA positive rate among hepatitis population. (page 54)

Figure S20. Forest plot of estimated pooled seroprevalence of anti-HEV IgG among HIV population based on different countries. (page 55-57)

Figure S21. Forest plot of estimated pooled seroprevalence of anti-HEV IgM among HIV population based on different countries. (page 58-59)

Figure S22. Forest plot of estimated pooled HEV RNA positive rate among HIV population based on different countries. (page 60)

Figure S23. Forest plot of estimated pooled seroprevalence of anti-HEV IgG among transplant population based on different countries. (page 61)

Figure S24. Forest plot of estimated pooled seroprevalence of anti-HEV IgM among transplant population based on different countries. (page 62)

Figure S25. Forest plot of estimated pooled HEV RNA positive rate among transplant population based on different countries. (page 63)

Figure S26. Forest plot of estimated pooled seroprevalence of anti-HEV IgG among hemodialysis population based on different countries. (page 64)

Figure S27. Forest plot of estimated pooled seroprevalence of anti-HEV IgM among hemodialysis population based on different countries. (page 65)

Figure S28. Pooled Odd Ratios of anti-HEV IgG seroprevalence to investigate the risk factors for HEV infection among general population. (page 66)

Figure S29. Odds ratio analysis of anti-HEV IgG seroprevalence for people contacting dogs or not in general population. (page 67)

Figure S30. Odds ratio analysis of anti-HEV IgG seroprevalence for people contacting cats or not in general population. (page 67)

Figure S31. Odds ratio analysis of anti-HEV IgG seroprevalence for people with or without blood transfusion in general population. (page 67)

Figure S32. Odds ratio analysis of anti-HEV IgG seroprevalence for people with or without consumption of raw meat in general population. (page 68)

Figure S33. Odds ratio analysis of anti-HEV IgG seroprevalence for people frequently exposed to soil or unexposed to soil in general population. (page 68)

Figure S34. Odds ratio analysis of anti-HEV IgG seroprevalence for people with or without travelling to endemic areas in general population. (page 68)

Figure S35. Odds ratio analysis of anti-HEV IgG seroprevalence for urban residents or rural residents in general population. (page 69)

Figure S36. Odds ratio analysis of anti-HEV IgG seroprevalence for people receive water source of tap/well/river in general population. (page 70)

Figure S37. Odds ratio analysis of anti-HEV IgG seroprevalence for people accepting education of elementary or above elementary in general population. (page 71)

Figure S38. Odds ratio analysis of anti-HEV IgG seroprevalence for people with or without MSM experience in general population. (page 72)

Figure S39. Odds ratio analysis of anti-HEV IgG seroprevalence for people with or without IDU experience in general population. (page 72)

Figure S40. Forest plot of estimated pooled anti-HEV IgG positive rate among general population based on different ELISA manufactures. (page 73-76)

Figure S41. Funnel plot for anti-HEV IgG seroprevalence among general population. (page 77)

Figure S42. Egger plot for anti-HEV IgG seroprevalence among general population. (page 77)

Table S1. Score of studies evaluated by JBI Critical Appraisal Tools. (page 78-88)

Table S2. Distribution of HEV genotypes 1-4 in different countries. (page 89-90)

Table S3. Sensitivity analysis in epidemiology of anti-HEV IgG in general population. (page 91-94)

Table S4. Manufactures of ELISA assays used in general population. (page 95-98)

Table S5. HEV prevalence among occupational population and special population. (page 99)

## Supplementary file 1.

We systematically searched Embase.com, Medline Ovid, Web of science, Cochrane CENTRAL, Google scholar to identify studies providing prevalence rate of HEV.

|                  |      |      |
|------------------|------|------|
| Embase.com       | 3196 | 3123 |
| Medline Ovid     | 2786 | 592  |
| Web of science   | 1885 | 453  |
| Cochrane CENTRAL | 28   | 9    |
| Google scholar   | 200  | 36   |
| Total            | 8095 | 4213 |

The search terms used in different database were as follows:

### Embase.com

('Hepatitis E virus'/de OR 'hepatitis E'/de OR 'hepatitis E antibody'/de OR 'hepatitis E antigen'/de OR ((Hepatitis NEAR/3 E) OR hev):ab,ti) AND ('epidemiological data'/de OR 'epidemiology'/de OR 'geographic distribution'/de OR incidence/exp OR 'patient volume'/de OR prevalence/exp OR 'infection rate'/de OR 'age distribution'/de OR seroepidemiology/de OR 'occupation'/de OR vocation/de OR specialization/de OR 'virus virulence'/de OR virulence/de OR geography/de OR 'occupational disease'/de OR 'occupational exposure'/de OR 'occupational health'/de OR 'occupational hazard'/de OR 'geographic names'/exp OR (epidemiolog\* OR seroepidemiolog\* OR ((geograph\* OR global\* OR age) NEAR/3 (distribut\*)) OR incidenc\* OR (patient\* NEAR/3 volume\*) OR prevalen\* OR seroprevalen\* OR (infection\* NEAR/3 rate\*) OR occupation\* OR vocation\* OR virulen\* OR specialization\* OR specialisation\*):ab,ti) NOT (hepatitis-b-e NOT hepatitis-e) NOT ([animals]/lim NOT [humans]/lim) NOT ('case report'/de OR 'case report\*':ti) NOT ([Conference Abstract]/lim) AND [english]/lim

### Medline Ovid

(Hepatitis E virus/ OR Hepatitis E/ OR ((Hepatitis ADJ3 E) OR hev).ab,ti.) AND (Epidemiological Monitoring/ OR Epidemiology/ OR Epidemiology.fs. OR exp Incidence/ OR exp Prevalence/ OR Age Distribution/ OR Occupations/ OR Specialization/ OR Virulence/ OR Geography/ OR Occupational Diseases/ OR Occupational Exposure/ OR Occupational Health/ OR exp Geographic Locations/ OR (epidemiolog\* OR seroepidemiolog\* OR ((geograph\* OR global\* OR age) ADJ3 (distribut\*)) OR incidenc\* OR (patient\* ADJ3 volume\*) OR prevalen\* OR seroprevalen\* OR (infection\* ADJ3 rate\*) OR occupation\* OR vocation\* OR virulen\* OR specialization\* OR specialisation\*).ab,ti.) NOT (hepatitis-b-e NOT hepatitis-e) NOT (exp animals/ NOT humans/) NOT (case report/ OR case report\*.ti.) AND english.la.

### Web of science

TS=(((Hepatitis NEAR/2 E) OR hev)) AND ((epidemiolog\* OR seroepidemiolog\* OR ((geograph\* OR global\* OR age) NEAR/2 (distribut\*)) OR incidenc\* OR (patient\* NEAR/2 volume\*) OR prevalen\* OR seroprevalen\* OR (infection\* NEAR/2 rate\*) OR occupation\* OR vocation\* OR virulen\* ORspecialization\* OR specialisation\*)) NOT (hepatitis-b-e NOT hepatitis-e) NOT ((animal\* OR rat OR rats OR mouse OR mice OR murine OR dog OR dogs OR canine OR cat OR cats OR feline OR rabbit OR cow OR cows OR bovine OR rodent\* OR sheep OR ovine OR pig OR swine OR porcine OR veterinar\* OR chick\* OR zebrafish\* OR baboon\* OR nonhuman\* OR primate\* OR cattle\* OR goose OR geese OR duck OR macaque\* OR avian\* OR bird\* OR fish\*) NOT (human\* OR patient\* OR women OR woman OR men OR man))) AND DT=(article) AND LA=(english) NOT TI=("case report\*")

### Cochrane CENTRAL

((Hepatitis NEAR/3 E) OR hev):ab,ti) AND ((epidemiolog\* OR seroepidemiolog\* OR ((geograph\* OR global\* OR age) NEAR/3 (distribut\*)) OR incidenc\* OR (patient\* NEAR/3 volume\*) OR prevalen\* OR seroprevalen\* OR (infection\* NEAR/3 rate\*) OR occupation\* OR vocation\* OR virulen\* OR specialization\* OR specialisation\*):ab,ti) NOT (hepatitis next b next e NOT hepatitis next e)

### Google scholar



"HepatitisE" epidemiology|seroepidemiology|"geographic|global|age distribution"|incidence|"patient volume"|prevalence|seroprevalence|"infection rate"|occupational|virulence

### **Study selection criteria**

#### **Study population:**

General population: blood donors, pregnant women, healthy people, hospital attendants

Occupational population: veterinarians, swine workers, slaughterhouse workers, pork sellers

Special population: people suffering hemodialysis, people with acute hepatitis (hepatitis caused by hepatitis B virus or hepatitis C virus or unknown pathogen), HIV-infected population, transplant recipients (renal transplant, liver transplant, lung transplant, heart transplant, bone marrow transplant).

Study inclusion criteria: provide data related to prevalence of hepatitis E virus infection.

Study exclusion criteria: case reports, reviews, none-HEV studies, antiviral research of HEV, study of clinical drug effect, no primary data, outbreak, animal HEV studies, replicate data in same areas, study population below 50 for general population, study population below 50 for occupational and special population.

**Figure S1. Forest plot of estimated pooled anti-HEV IgG seroprevalence among general population based on different countries.**

Note: country named multiple means people in the study are from more than one country. For example, Halliday et al, 2014 contained people from Papua New Guinea, Fiji, Kiribati; Baylis yet al, 2012 contained people from Sweden, Germany and USA.

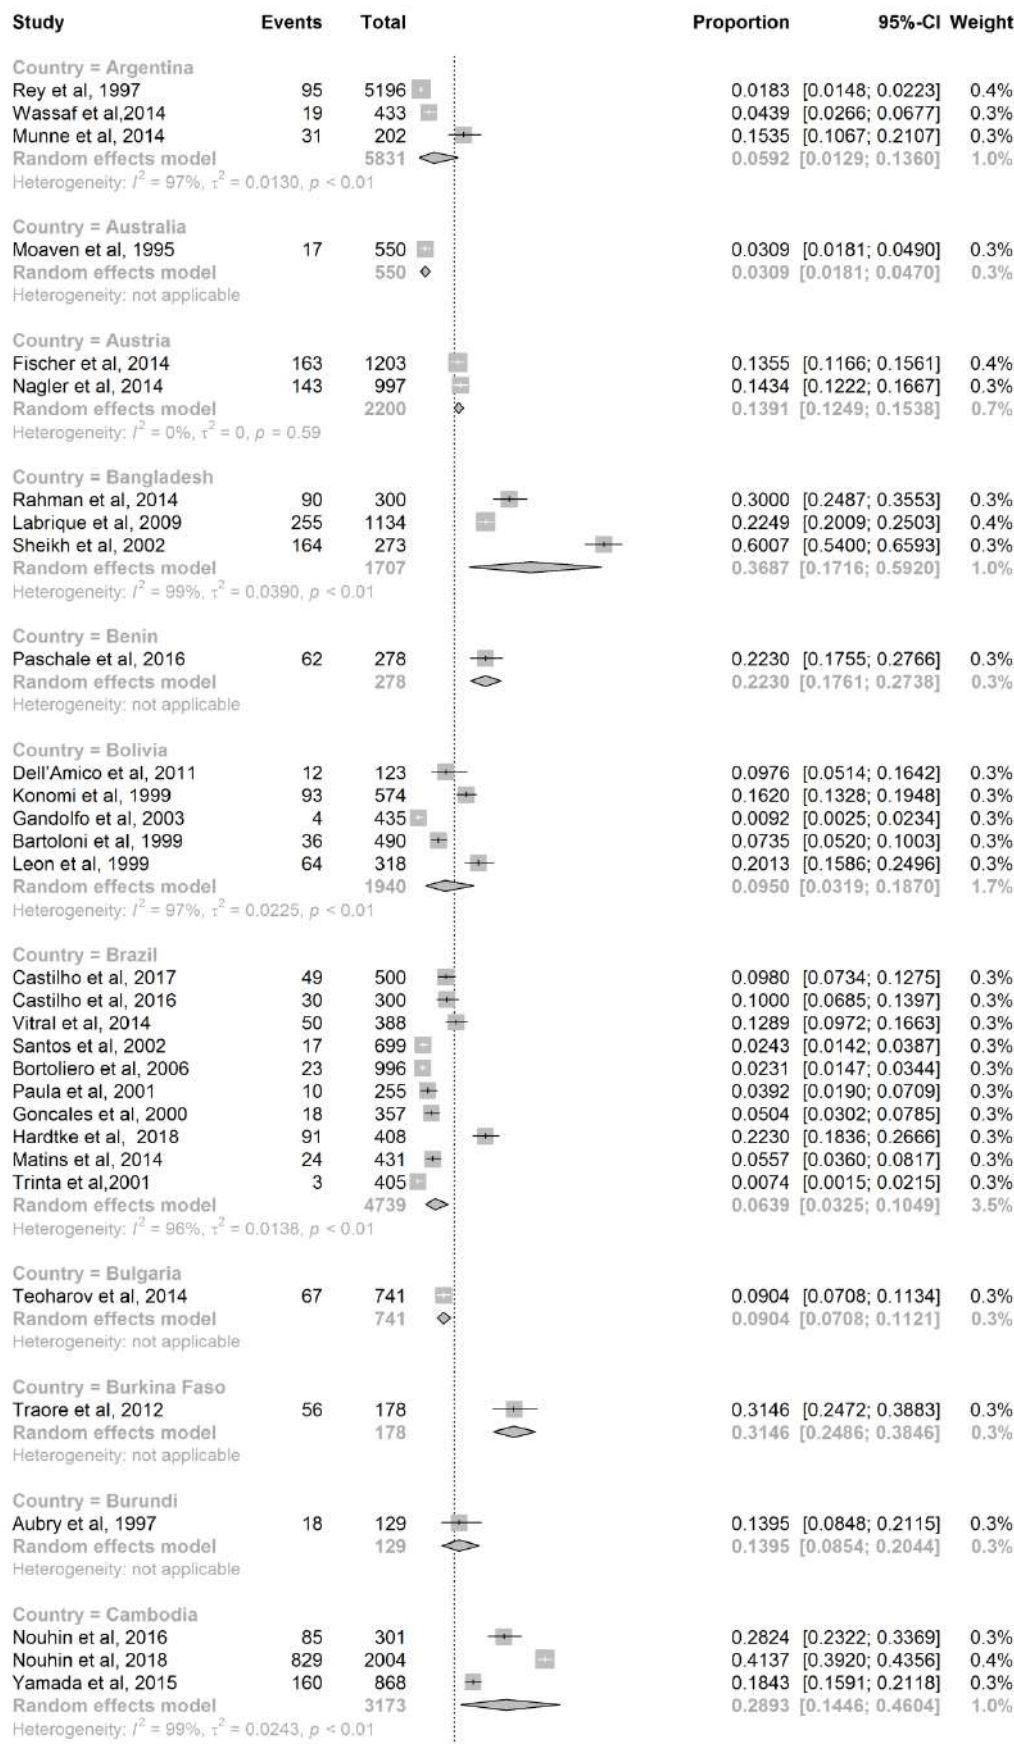

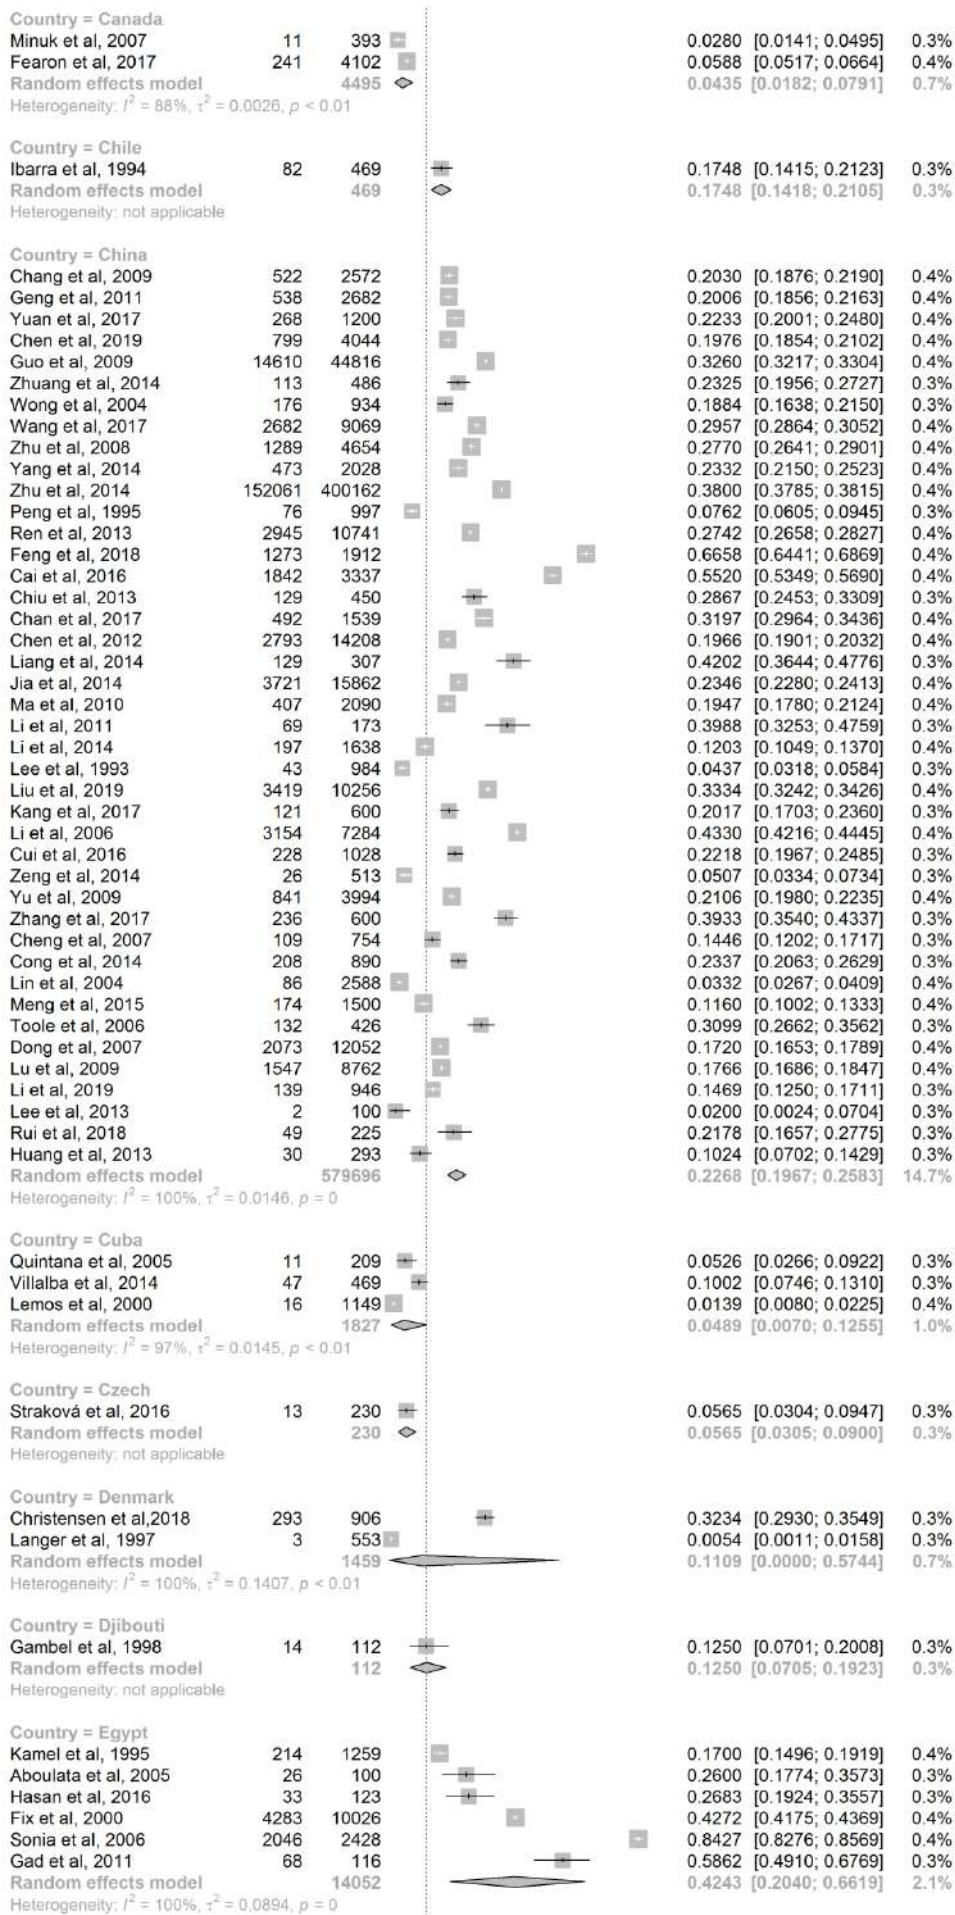

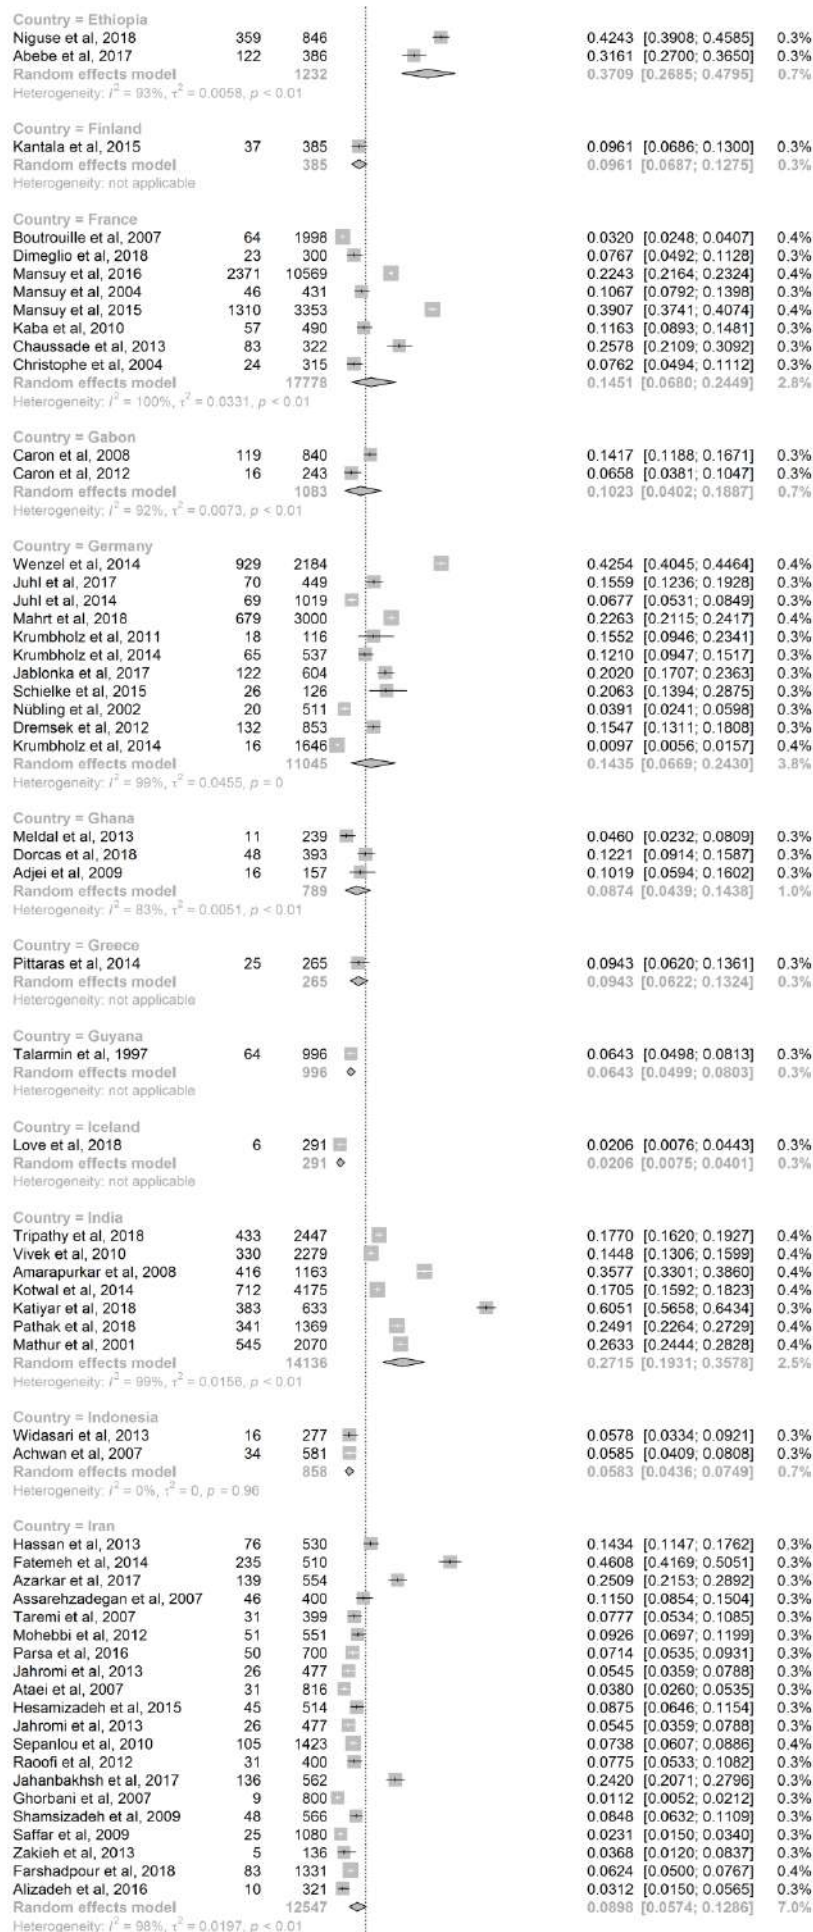



|                                                              |      |       |                              |
|--------------------------------------------------------------|------|-------|------------------------------|
| <b>Country = Ireland</b>                                     |      |       |                              |
| O'Riordan et al, 2016                                        | 57   | 1076  | 0.0530 [0.0404; 0.0681] 0.3% |
| Hickey et al, 2016                                           | 16   | 198   | 0.0808 [0.0469; 0.1279] 0.3% |
| Random effects model                                         |      | 1274  | 0.0617 [0.0392; 0.0890] 0.7% |
| Heterogeneity: $I^2 = 52\%$ , $\tau^2 = 0.0008$ , $p = 0.15$ |      |       |                              |
| <b>Country = Israel</b>                                      |      |       |                              |
| Mor et al, 2015                                              | 77   | 729   | 0.1056 [0.0843; 0.1302] 0.3% |
| Karetny et al, 1995                                          | 37   | 1416  | 0.0261 [0.0185; 0.0358] 0.4% |
| Lachish et al, 2013                                          | 19   | 4970  | 0.0038 [0.0023; 0.0060] 0.4% |
| Random effects model                                         |      | 7115  | 0.0336 [0.0019; 0.1022] 1.1% |
| Heterogeneity: $I^2 = 99\%$ , $\tau^2 = 0.0154$ , $p < 0.01$ |      |       |                              |
| <b>Country = Italy</b>                                       |      |       |                              |
| Spada et al, 2018                                            | 869  | 10011 | 0.0868 [0.0814; 0.0925] 0.4% |
| Gessoni et al, 1996                                          | 49   | 1889  | 0.0259 [0.0193; 0.0341] 0.4% |
| Ricco et al, 2016                                            | 9    | 199   | 0.0452 [0.0209; 0.0841] 0.3% |
| Puttini et al, 2015                                          | 12   | 132   | 0.0909 [0.0479; 0.1534] 0.3% |
| Pavia et al, 1998                                            | 3    | 360   | 0.0083 [0.0017; 0.0242] 0.3% |
| Zuin et al, 2016                                             | 380  | 3546  | 0.1072 [0.0972; 0.1178] 0.4% |
| Scotto et al, 2012                                           | 2    | 151   | 0.0132 [0.0016; 0.0470] 0.3% |
| Sabato et al, 2017                                           | 4    | 253   | 0.0158 [0.0043; 0.0400] 0.3% |
| Lucarelli et al, 2016                                        | 153  | 313   | 0.4888 [0.4322; 0.5457] 0.3% |
| Marcantonio et al, 2018                                      | 10   | 198   | 0.0505 [0.0245; 0.0909] 0.3% |
| Lanini et al, 2015                                           | 60   | 1116  | 0.0538 [0.0413; 0.0687] 0.4% |
| Rapicetta et al, 1999                                        | 113  | 973   | 0.1161 [0.0967; 0.1380] 0.3% |
| Tabili et al, 2013                                           | 23   | 103   | 0.2233 [0.1471; 0.3160] 0.3% |
| Alecci et al, 1997                                           | 3    | 244   | 0.0123 [0.0025; 0.0355] 0.3% |
| Random effects model                                         |      | 19488 | 0.0728 [0.0454; 0.1060] 4.9% |
| Heterogeneity: $I^2 = 98\%$ , $\tau^2 = 0.0116$ , $p < 0.01$ |      |       |                              |
| <b>Country = Japan</b>                                       |      |       |                              |
| Takahashi et al, 2010                                        | 1167 | 22027 | 0.0530 [0.0501; 0.0560] 0.4% |
| Takeda et al, 2010                                           | 431  | 12600 | 0.0342 [0.0311; 0.0375] 0.4% |
| Sakata et al, 2008                                           | 45   | 1389  | 0.0324 [0.0237; 0.0431] 0.4% |
| Toyoda et al, 2008                                           | 60   | 592   | 0.1014 [0.0782; 0.1285] 0.3% |
| Fukuda et al, 2007                                           | 168  | 3185  | 0.0527 [0.0452; 0.0611] 0.4% |
| Ding et al, 2003                                             | 15   | 533   | 0.0281 [0.0158; 0.0460] 0.3% |
| Mitsui et al, 2005                                           | 6    | 266   | 0.0226 [0.0083; 0.0484] 0.3% |
| Goto et al, 2006                                             | 9    | 344   | 0.0262 [0.0120; 0.0491] 0.3% |
| Random effects model                                         |      | 40936 | 0.0426 [0.0327; 0.0537] 2.8% |
| Heterogeneity: $I^2 = 94\%$ , $\tau^2 = 0.0011$ , $p < 0.01$ |      |       |                              |
| <b>Country = Jordan</b>                                      |      |       |                              |
| Mohammad et al, 2017                                         | 139  | 450   | 0.3089 [0.2665; 0.3538] 0.3% |
| Random effects model                                         |      | 450   | 0.3089 [0.2671; 0.3523] 0.3% |
| Heterogeneity: not applicable                                |      |       |                              |
| <b>Country = Kazakhstan</b>                                  |      |       |                              |
| Cainelli et al, 2018                                         | 11   | 199   | 0.0553 [0.0279; 0.0968] 0.3% |
| Random effects model                                         |      | 199   | 0.0553 [0.0279; 0.0912] 0.3% |
| Heterogeneity: not applicable                                |      |       |                              |
| <b>Country = Korea</b>                                       |      |       |                              |
| Ahn et al, 2005                                              | 138  | 1030  | 0.1340 [0.1138; 0.1563] 0.3% |
| Yoon et al, 2014                                             | 144  | 2450  | 0.0588 [0.0498; 0.0688] 0.4% |
| Yun et al, 2011                                              | 46   | 489   | 0.0941 [0.0697; 0.1235] 0.3% |
| Random effects model                                         |      | 3969  | 0.0930 [0.0487; 0.1496] 1.0% |
| Heterogeneity: $I^2 = 96\%$ , $\tau^2 = 0.0057$ , $p < 0.01$ |      |       |                              |
| <b>Country = Laos</b>                                        |      |       |                              |
| Khounvisith et al, 2018                                      | 38   | 210   | 0.1810 [0.1313; 0.2398] 0.3% |
| Random effects model                                         |      | 210   | 0.1810 [0.1320; 0.2358] 0.3% |
| Heterogeneity: not applicable                                |      |       |                              |
| <b>Country = Malawi</b>                                      |      |       |                              |
| Taha et al, 2015                                             | 80   | 397   | 0.2015 [0.1631; 0.2444] 0.3% |
| Random effects model                                         |      | 397   | 0.2015 [0.1636; 0.2423] 0.3% |
| Heterogeneity: not applicable                                |      |       |                              |
| <b>Country = Mexico</b>                                      |      |       |                              |
| Esquivel et al, 2014                                         | 100  | 273   | 0.3663 [0.3090; 0.4265] 0.3% |
| Munoz et al, 1999                                            | 374  | 3549  | 0.1054 [0.0955; 0.1160] 0.4% |
| Héctor et al, 2017                                           | 1    | 127   | 0.0079 [0.0002; 0.0431] 0.3% |
| Cosme et al, 2014                                            | 25   | 439   | 0.0569 [0.0372; 0.0829] 0.3% |
| Esquivel et al, 2015                                         | 10   | 150   | 0.0667 [0.0324; 0.1192] 0.3% |
| Esquivel et al, 2015                                         | 25   | 439   | 0.0569 [0.0372; 0.0829] 0.3% |
| Random effects model                                         |      | 4977  | 0.0897 [0.0375; 0.1614] 2.1% |
| Heterogeneity: $I^2 = 97\%$ , $\tau^2 = 0.0177$ , $p < 0.01$ |      |       |                              |
| <b>Country = Moldova</b>                                     |      |       |                              |
| Drobeniuc et al, 2001                                        | 63   | 255   | 0.2471 [0.1954; 0.3047] 0.3% |
| Random effects model                                         |      | 255   | 0.2471 [0.1962; 0.3018] 0.3% |
| Heterogeneity: not applicable                                |      |       |                              |
| <b>Country = Mongolia</b>                                    |      |       |                              |
| Takahashi et al, 2004                                        | 28   | 249   | 0.1124 [0.0760; 0.1584] 0.3% |
| Davaalkham et al, 2009                                       | 3    | 520   | 0.0058 [0.0012; 0.0168] 0.3% |
| Bira et al, 2007                                             | 5    | 717   | 0.0070 [0.0023; 0.0162] 0.3% |
| Random effects model                                         |      | 1486  | 0.0270 [0.0006; 0.0908] 1.0% |
| Heterogeneity: $I^2 = 98\%$ , $\tau^2 = 0.0149$ , $p < 0.01$ |      |       |                              |

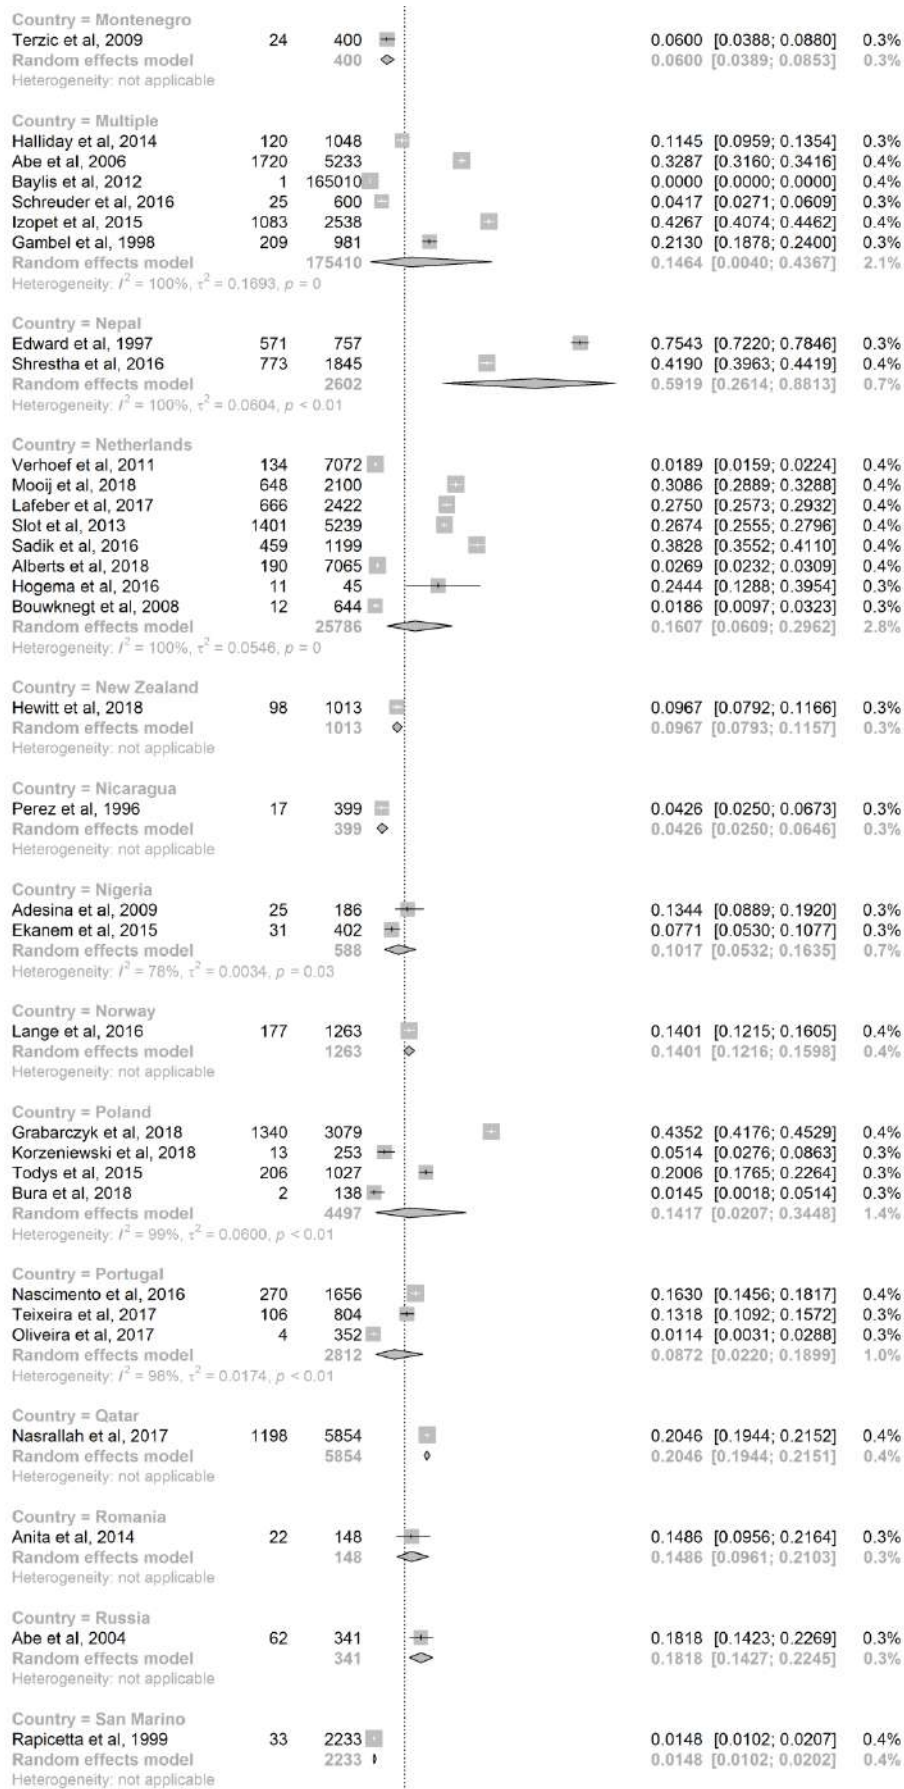

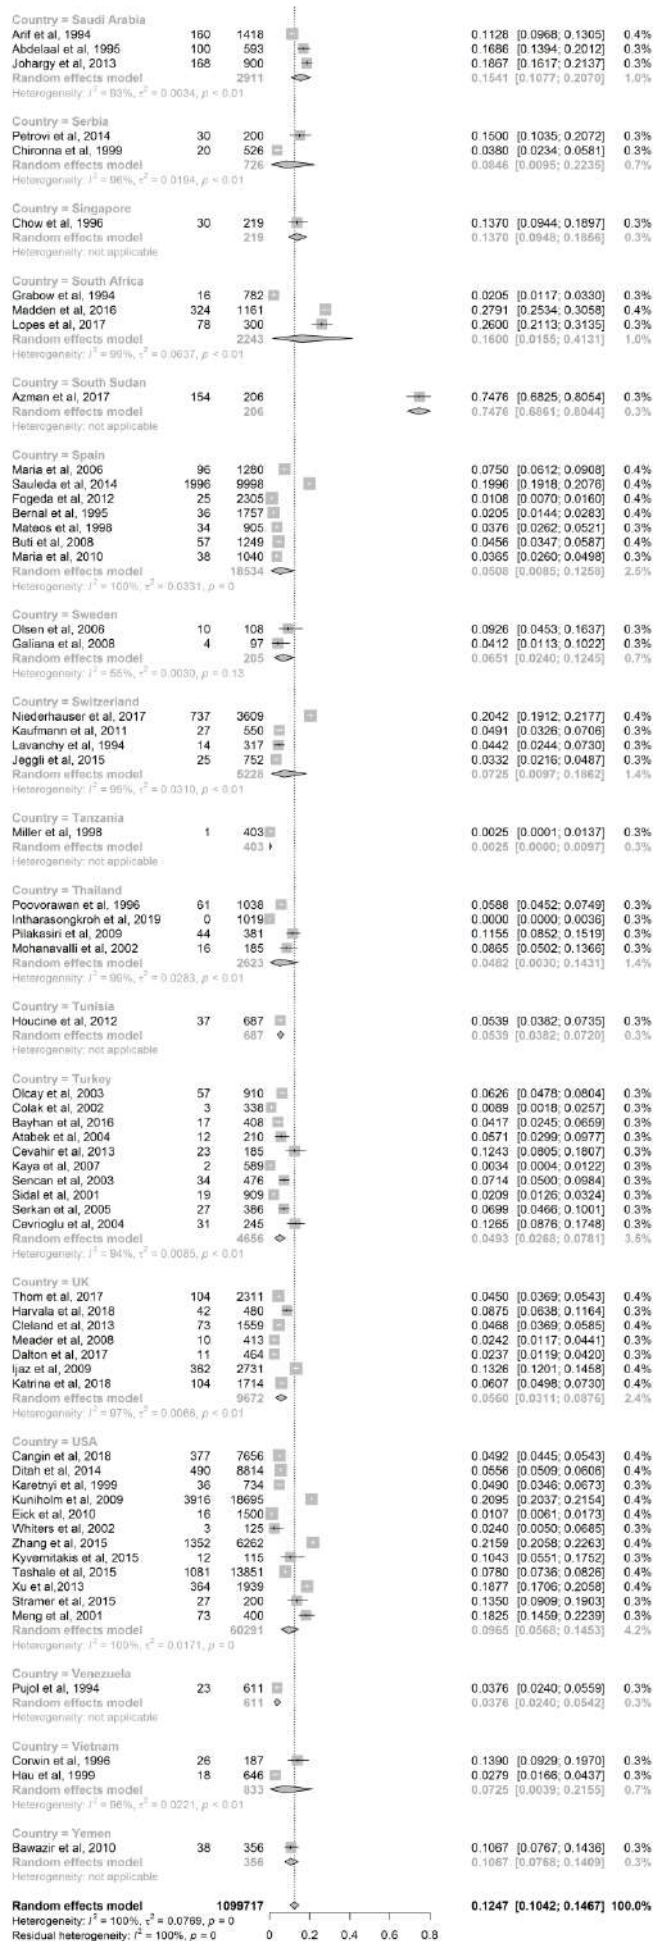



**Figure S2. Forest plot of estimated pooled anti-HEV IgM seroprevalence among general population based on different countries.**

Note: country named multiple means people in the study are from more than one country.

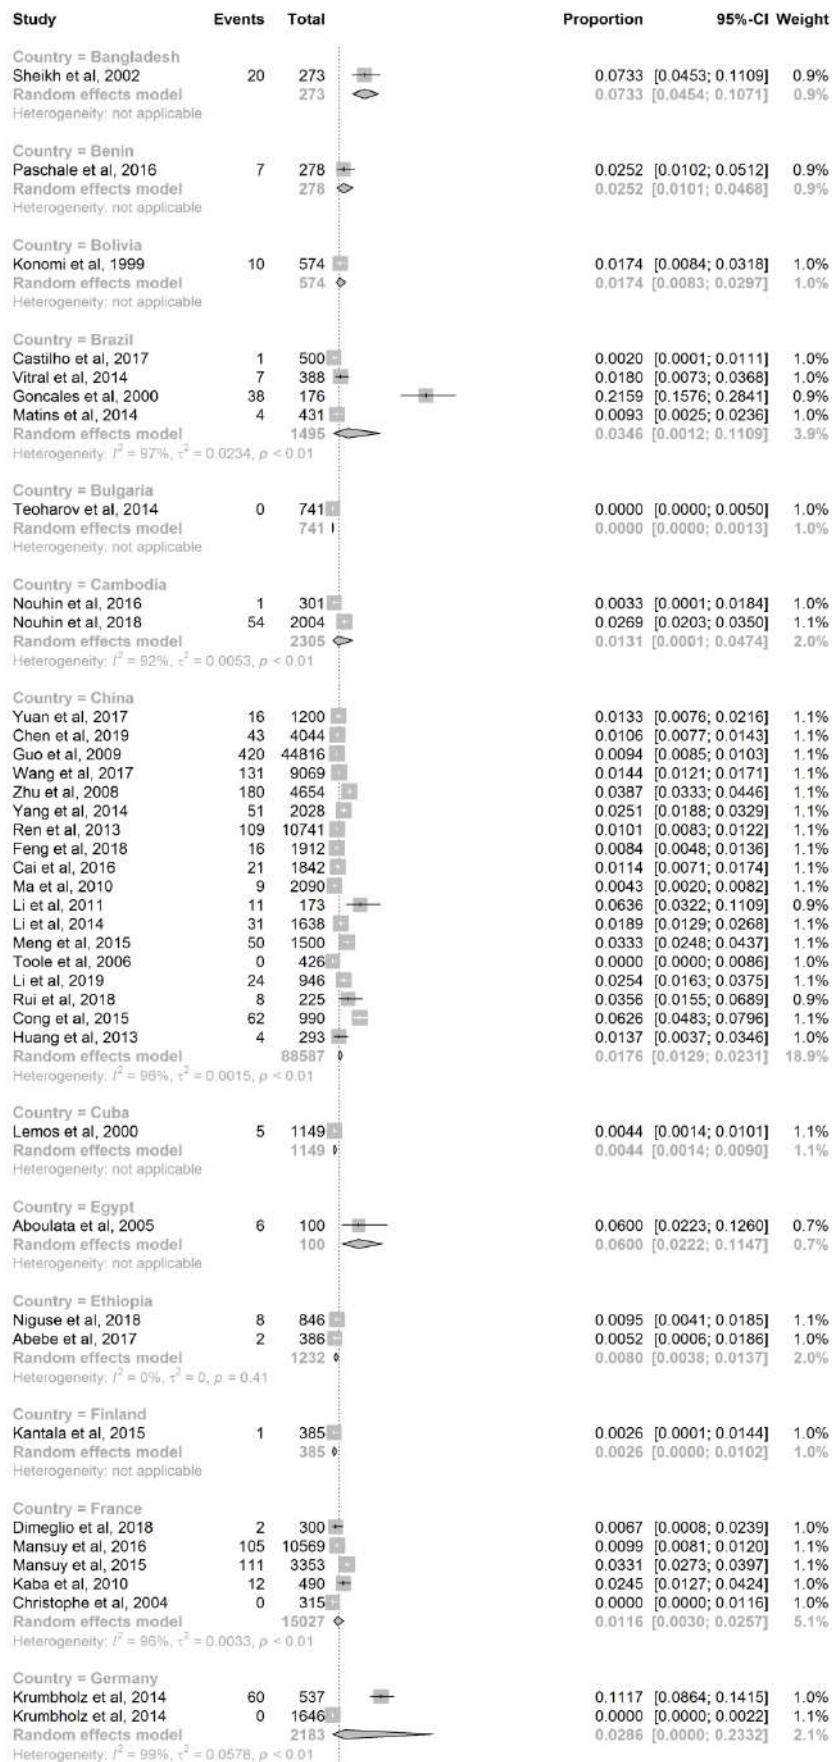



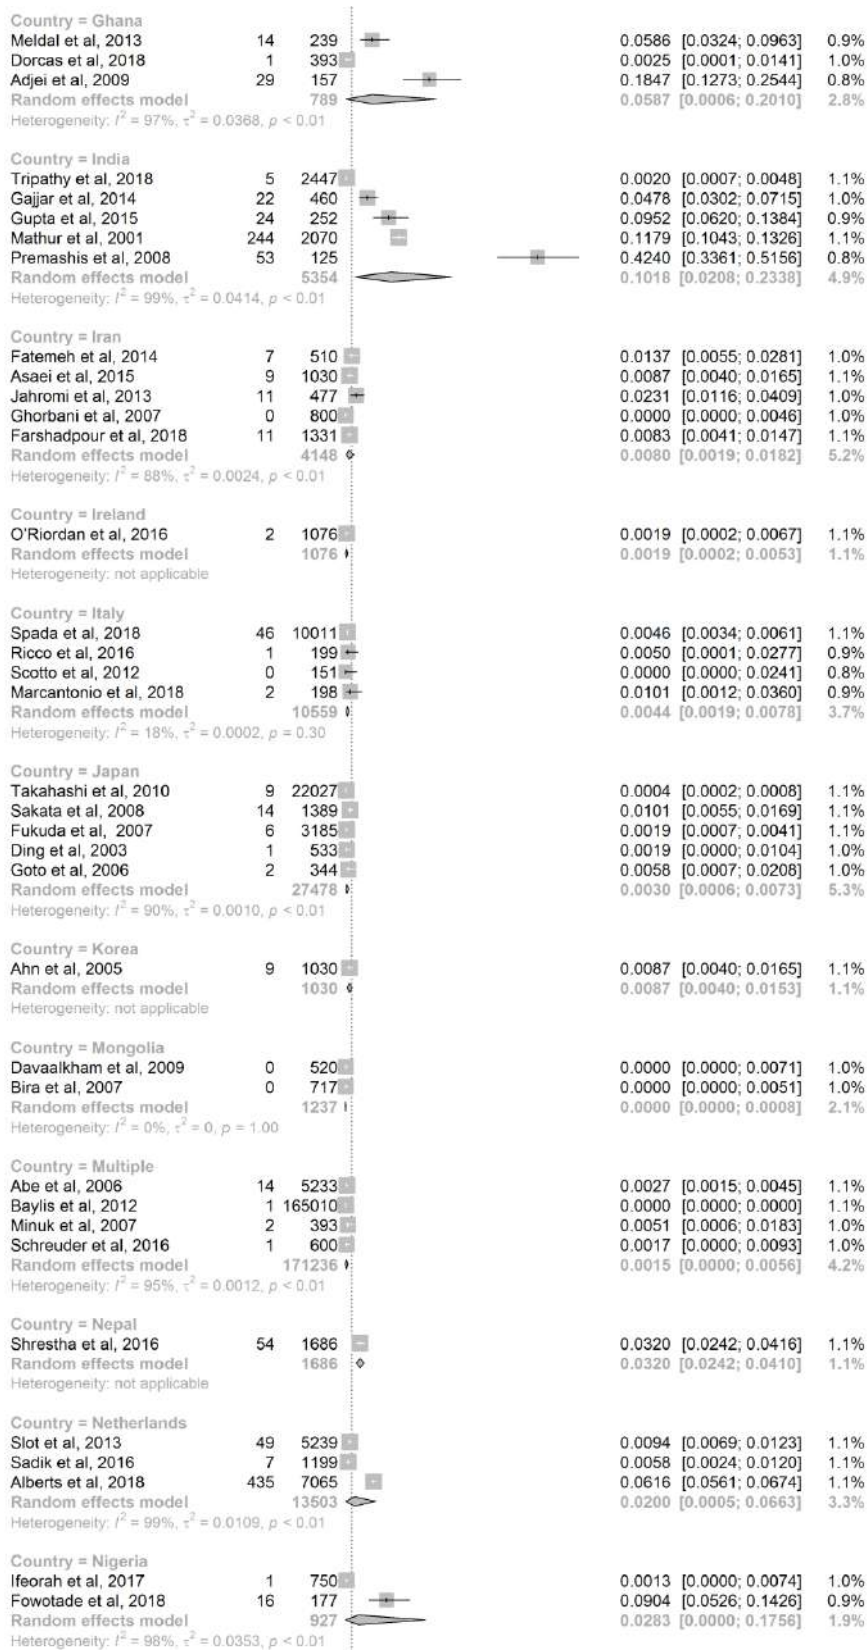

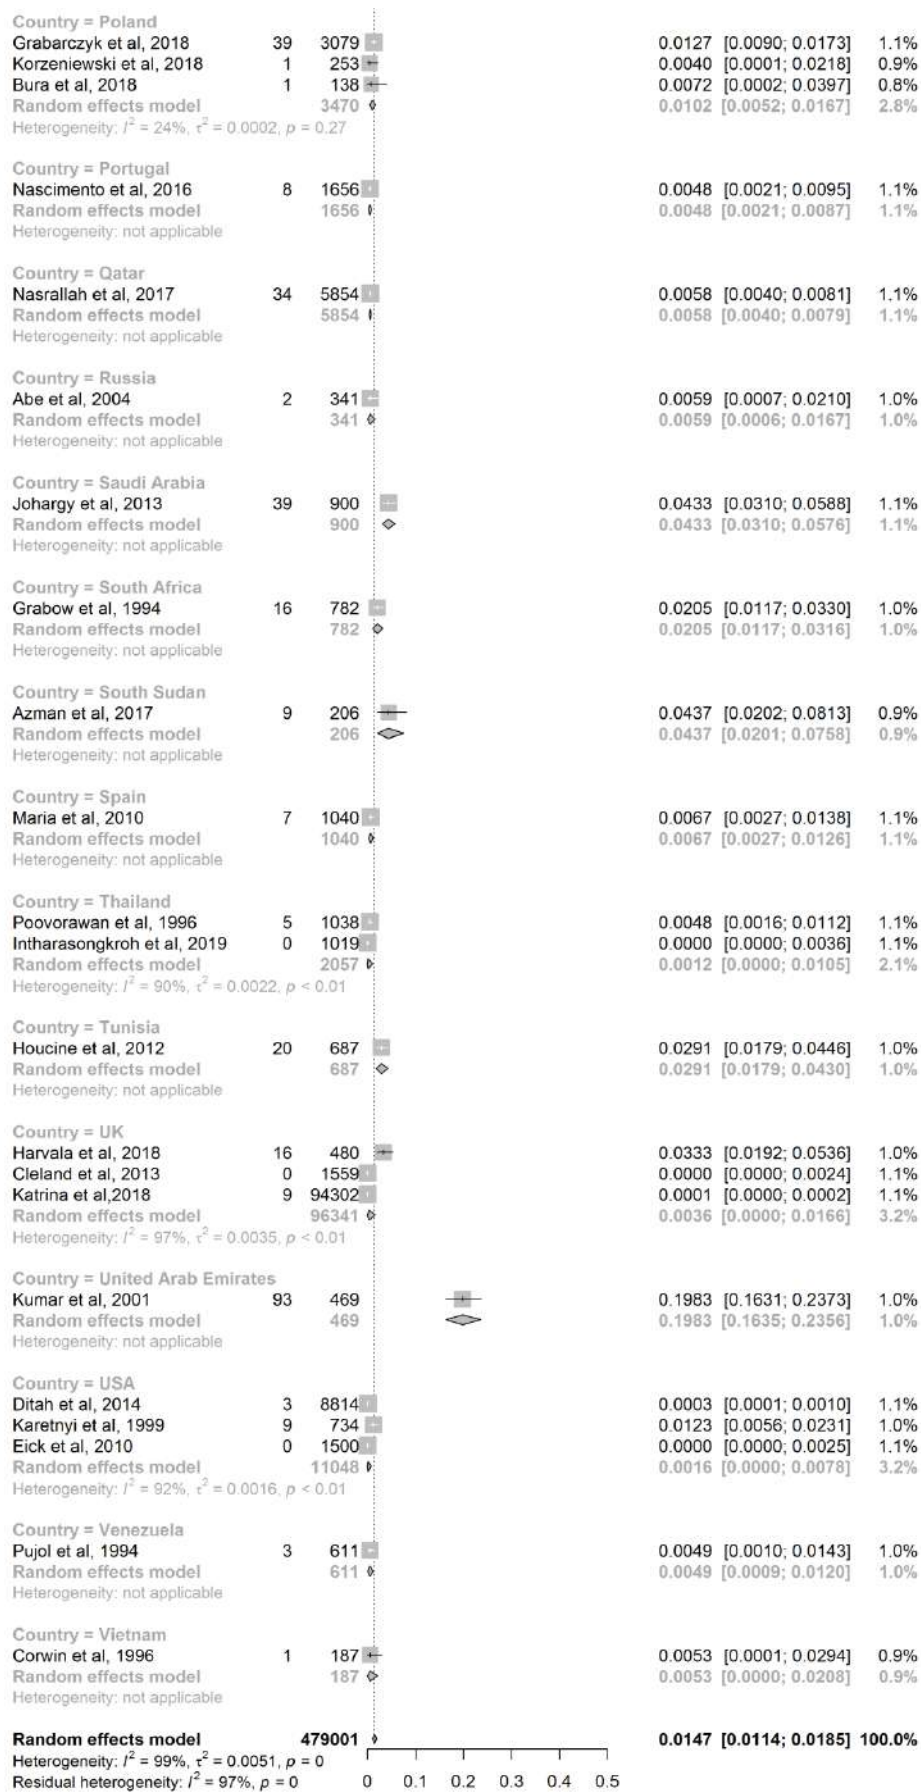

**Figure S3. Forest plot of estimated pooled HEV RNA positive rate among general population based on different countries.**

Note: country named multiple means people in the study are from more than one country.

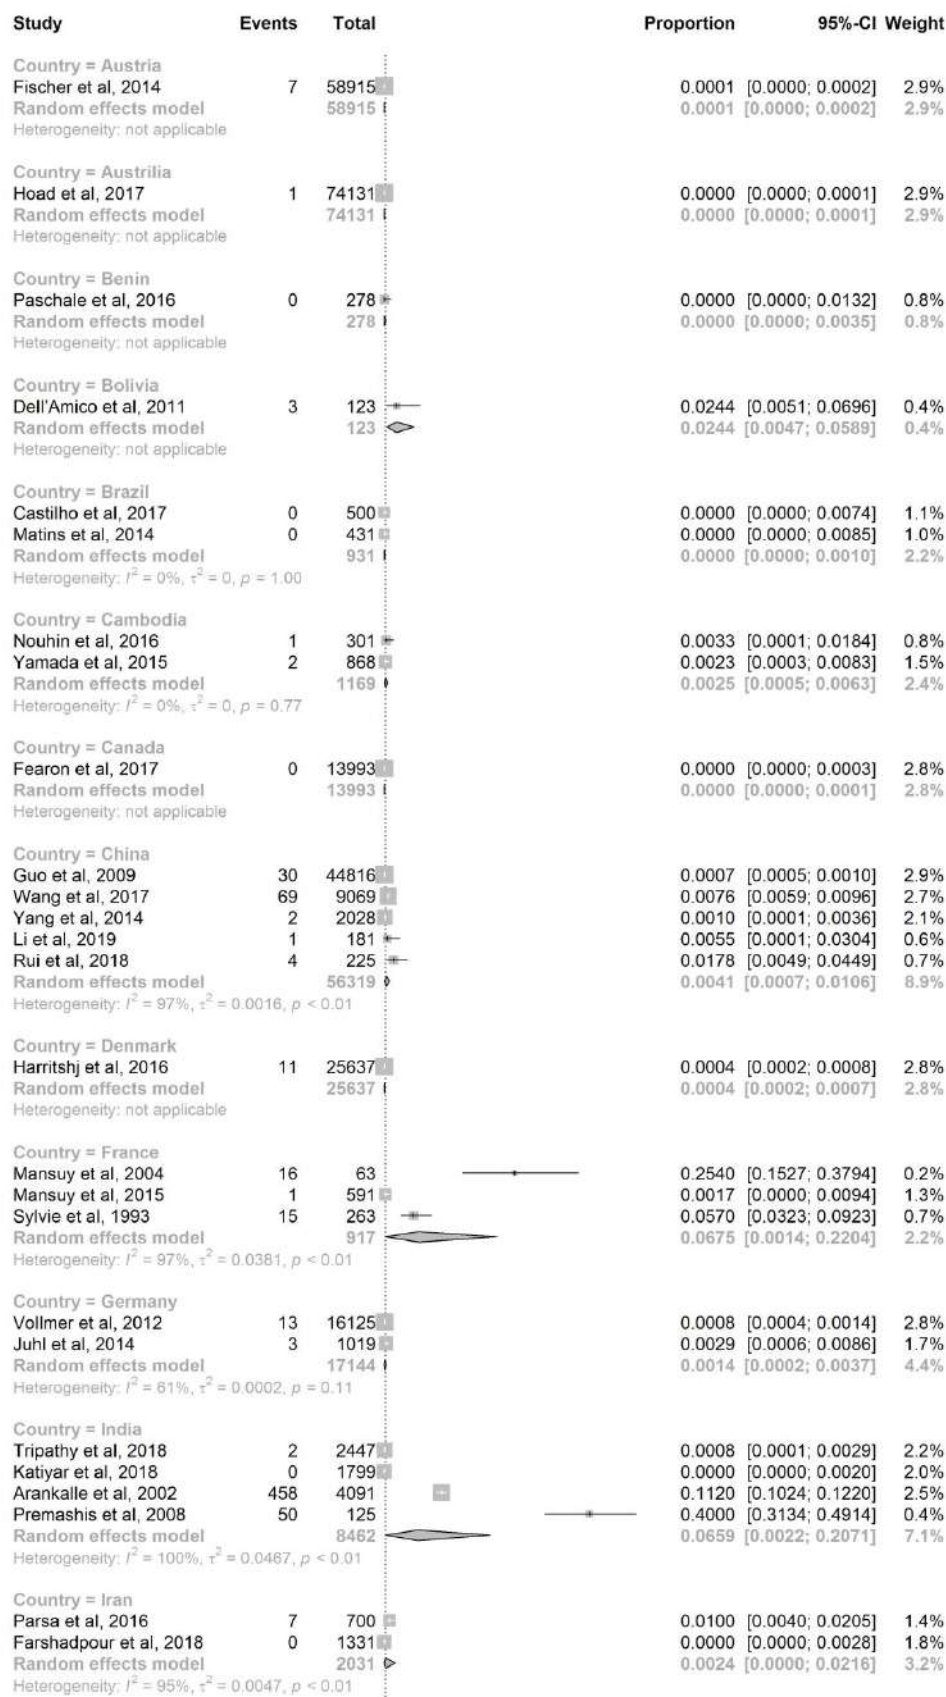

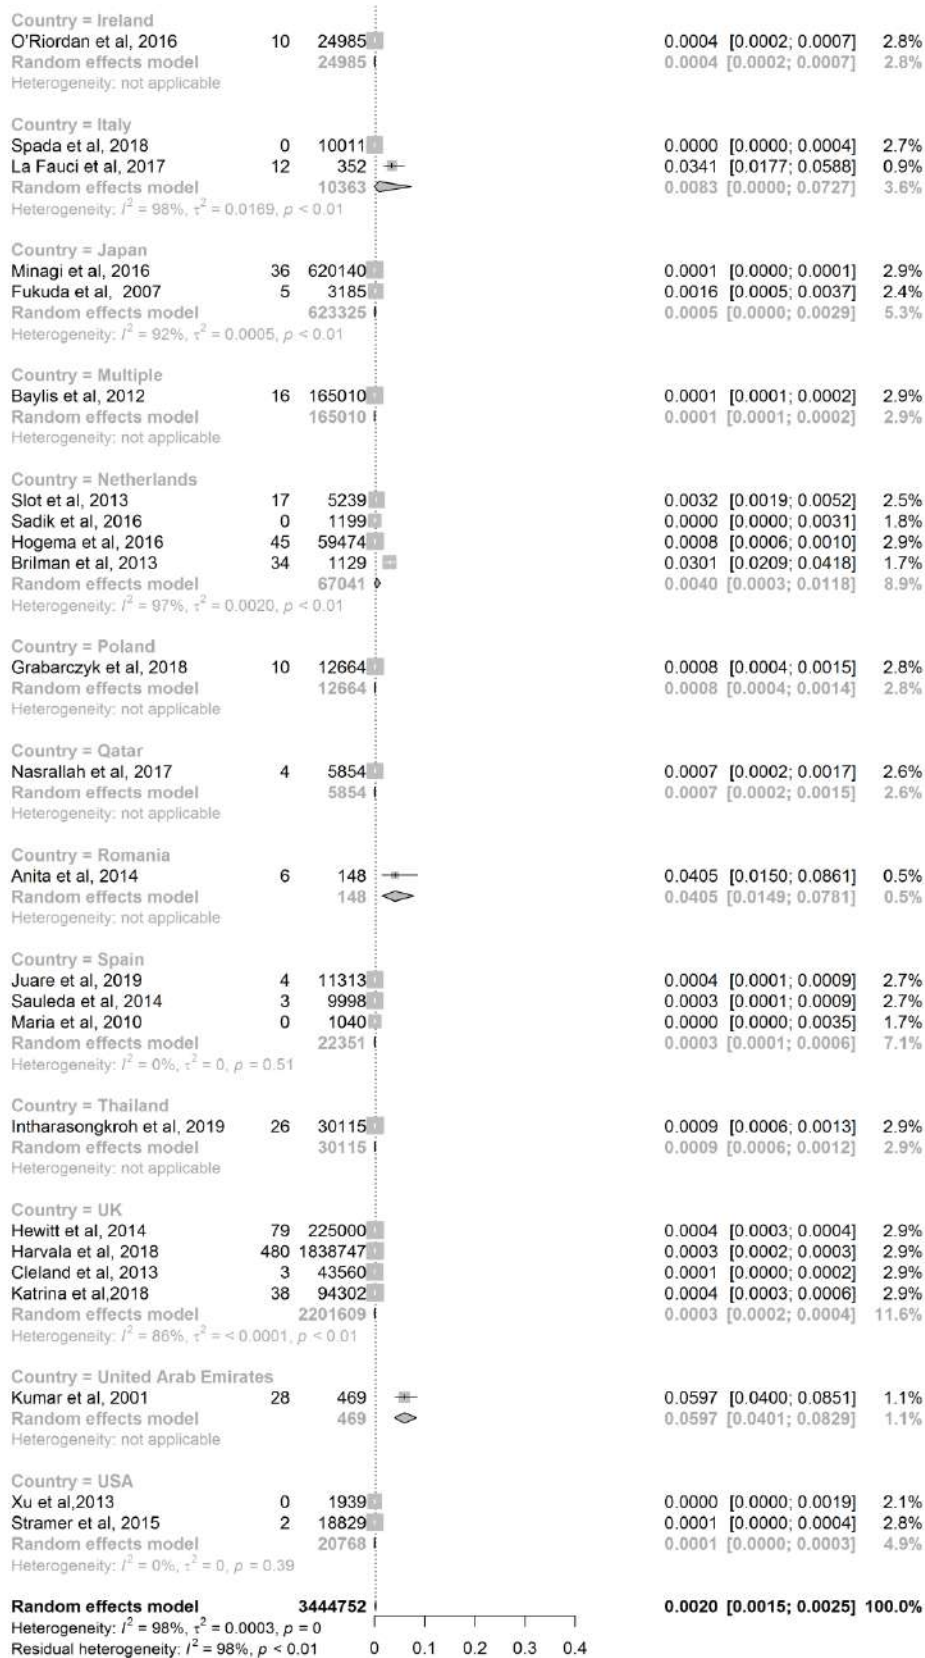



**Figure S4. Forest plot of estimated anti-HEV IgG seroprevalence among general population based on different continents.**

Note: continent named multiple means people in the study are from more than one country and cannot be included into one continent.

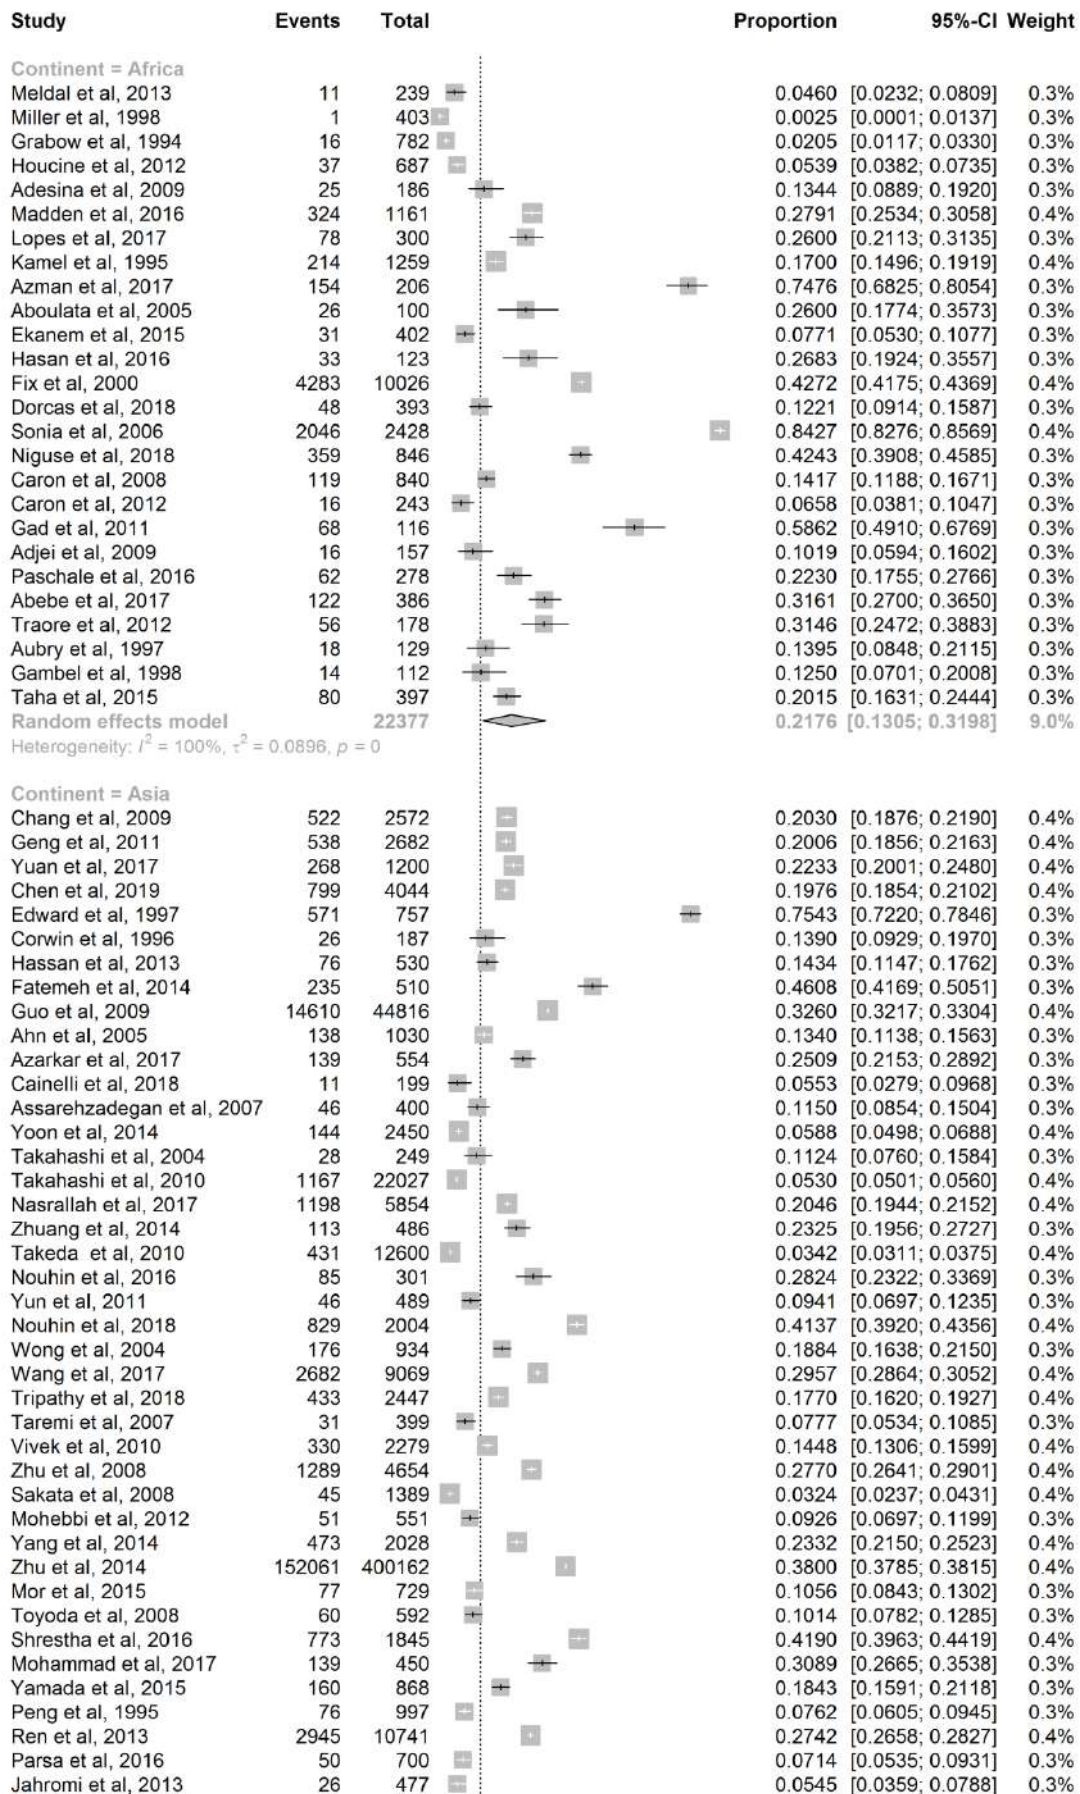

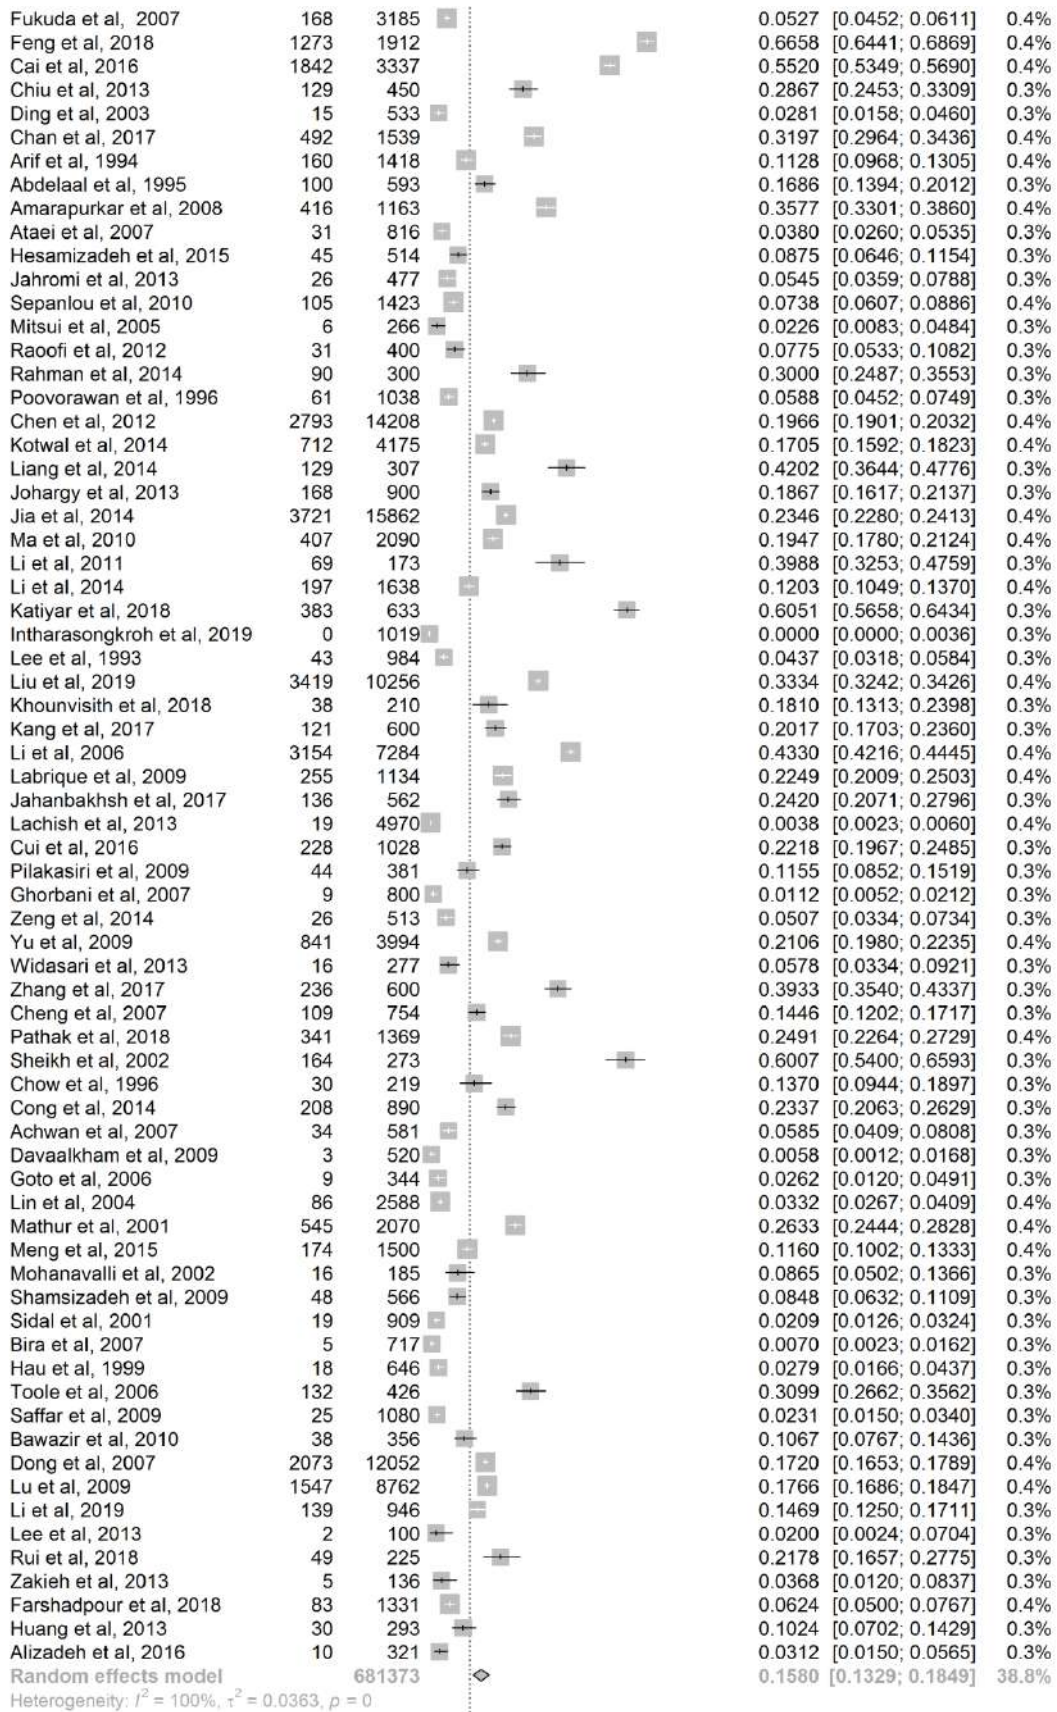



Continent = Europe

|                          |      |       |  |                         |      |
|--------------------------|------|-------|--|-------------------------|------|
| Maria et al, 2006        | 96   | 1280  |  | 0.0750 [0.0612; 0.0908] | 0.4% |
| Boutrouille et al, 2007  | 64   | 1998  |  | 0.0320 [0.0248; 0.0407] | 0.4% |
| Christensen et al, 2018  | 293  | 906   |  | 0.3234 [0.2930; 0.3549] | 0.3% |
| O'Riordan et al, 2016    | 57   | 1076  |  | 0.0530 [0.0404; 0.0681] | 0.3% |
| Spada et al, 2018        | 869  | 10011 |  | 0.0868 [0.0814; 0.0925] | 0.4% |
| Nascimento et al, 2016   | 270  | 1656  |  | 0.1630 [0.1456; 0.1817] | 0.4% |
| Verhoef et al, 2011      | 134  | 7072  |  | 0.0189 [0.0159; 0.0224] | 0.4% |
| Mooij et al, 2018        | 648  | 2100  |  | 0.3086 [0.2889; 0.3288] | 0.4% |
| Lafeber et al, 2017      | 666  | 2422  |  | 0.2750 [0.2573; 0.2932] | 0.4% |
| Olcay et al, 2003        | 57   | 910   |  | 0.0626 [0.0478; 0.0804] | 0.3% |
| Rapicetta et al, 1999    | 33   | 2233  |  | 0.0148 [0.0102; 0.0207] | 0.4% |
| Slot et al, 2013         | 1401 | 5239  |  | 0.2674 [0.2555; 0.2796] | 0.4% |
| Straková et al, 2016     | 13   | 230   |  | 0.0565 [0.0304; 0.0947] | 0.3% |
| Wenzel et al, 2014       | 929  | 2184  |  | 0.4254 [0.4045; 0.4464] | 0.4% |
| Petrovi et al, 2014      | 30   | 200   |  | 0.1500 [0.1035; 0.2072] | 0.3% |
| Sadik et al, 2016        | 459  | 1199  |  | 0.3828 [0.3552; 0.4110] | 0.4% |
| Thom et al, 2017         | 104  | 2311  |  | 0.0450 [0.0369; 0.0543] | 0.4% |
| Sauleda et al, 2014      | 1996 | 9998  |  | 0.1996 [0.1918; 0.2076] | 0.4% |
| Pittaras et al, 2014     | 25   | 265   |  | 0.0943 [0.0620; 0.1361] | 0.3% |
| Niederhauser et al, 2017 | 737  | 3609  |  | 0.2042 [0.1912; 0.2177] | 0.4% |
| Teoharov et al, 2014     | 67   | 741   |  | 0.0904 [0.0708; 0.1134] | 0.3% |
| Alberts et al, 2018      | 190  | 7065  |  | 0.0269 [0.0232; 0.0309] | 0.4% |
| Grabarczyk et al, 2018   | 1340 | 3079  |  | 0.4352 [0.4176; 0.4529] | 0.4% |
| Gessoni et al, 1996      | 49   | 1889  |  | 0.0259 [0.0193; 0.0341] | 0.4% |
| Fogeda et al, 2012       | 25   | 2305  |  | 0.0108 [0.0070; 0.0160] | 0.4% |
| Fischer et al, 2014      | 163  | 1203  |  | 0.1355 [0.1166; 0.1561] | 0.4% |
| Harvala et al, 2018      | 42   | 480   |  | 0.0875 [0.0638; 0.1164] | 0.3% |
| Cleland et al, 2013      | 73   | 1559  |  | 0.0468 [0.0369; 0.0585] | 0.4% |
| Dimiglio et al, 2018     | 23   | 300   |  | 0.0767 [0.0492; 0.1128] | 0.3% |
| Anita et al, 2014        | 22   | 148   |  | 0.1486 [0.0956; 0.2164] | 0.3% |
| Hogema et al, 2016       | 11   | 45    |  | 0.2444 [0.1288; 0.3954] | 0.3% |
| Hickey et al, 2016       | 16   | 198   |  | 0.0808 [0.0469; 0.1279] | 0.3% |
| Bernal et al, 1995       | 36   | 1757  |  | 0.0205 [0.0144; 0.0283] | 0.4% |
| Ricco et al, 2016        | 9    | 199   |  | 0.0452 [0.0209; 0.0841] | 0.3% |
| Puttini et al, 2015      | 12   | 132   |  | 0.0909 [0.0479; 0.1534] | 0.3% |
| Pavia et al, 1998        | 3    | 360   |  | 0.0083 [0.0017; 0.0242] | 0.3% |
| Zuin et al, 2016         | 380  | 3546  |  | 0.1072 [0.0972; 0.1178] | 0.4% |
| Scotto et al, 2012       | 2    | 151   |  | 0.0132 [0.0016; 0.0470] | 0.3% |
| Sabato et al, 2017       | 4    | 253   |  | 0.0158 [0.0043; 0.0400] | 0.3% |
| Love et al, 2018         | 6    | 291   |  | 0.0206 [0.0076; 0.0443] | 0.3% |
| Mansuy et al, 2016       | 2371 | 10569 |  | 0.2243 [0.2164; 0.2324] | 0.4% |
| Karetny et al, 1995      | 37   | 1416  |  | 0.0261 [0.0185; 0.0358] | 0.4% |
| Lucarelli et al, 2016    | 153  | 313   |  | 0.4888 [0.4322; 0.5457] | 0.3% |
| Lange et al, 2016        | 177  | 1263  |  | 0.1401 [0.1215; 0.1605] | 0.4% |
| Mateos et al, 1998       | 34   | 905   |  | 0.0376 [0.0262; 0.0521] | 0.3% |
| Marcantonio et al, 2018  | 10   | 198   |  | 0.0505 [0.0245; 0.0909] | 0.3% |
| Lanini et al, 2015       | 60   | 1116  |  | 0.0538 [0.0413; 0.0687] | 0.4% |
| Kaufmann et al, 2011     | 27   | 550   |  | 0.0491 [0.0326; 0.0706] | 0.3% |
| Mansuy et al, 2004       | 46   | 431   |  | 0.1067 [0.0792; 0.1398] | 0.3% |
| Mansuy et al, 2015       | 1310 | 3353  |  | 0.3907 [0.3741; 0.4074] | 0.4% |
| Juhl et al, 2017         | 70   | 449   |  | 0.1559 [0.1236; 0.1928] | 0.3% |
| Juhl et al, 2014         | 69   | 1019  |  | 0.0677 [0.0531; 0.0849] | 0.3% |
| Nagler et al, 2014       | 143  | 997   |  | 0.1434 [0.1222; 0.1667] | 0.3% |
| Langer et al, 1997       | 3    | 553   |  | 0.0054 [0.0011; 0.0158] | 0.3% |
| Lavanchy et al, 1994     | 14   | 317   |  | 0.0442 [0.0244; 0.0730] | 0.3% |
| Mahrt et al, 2018        | 679  | 3000  |  | 0.2263 [0.2115; 0.2417] | 0.4% |
| Krumbholz et al, 2011    | 18   | 116   |  | 0.1552 [0.0946; 0.2341] | 0.3% |
| Krumbholz et al, 2014    | 65   | 537   |  | 0.1210 [0.0947; 0.1517] | 0.3% |
| Jeggli et al, 2015       | 25   | 752   |  | 0.0332 [0.0216; 0.0487] | 0.3% |
| Kantala et al, 2015      | 37   | 385   |  | 0.0961 [0.0686; 0.1300] | 0.3% |
| Korzeniewski et al, 2018 | 13   | 253   |  | 0.0514 [0.0276; 0.0863] | 0.3% |
| Jablonka et al, 2017     | 122  | 604   |  | 0.2020 [0.1707; 0.2363] | 0.3% |
| Kaba et al, 2010         | 57   | 490   |  | 0.1163 [0.0893; 0.1481] | 0.3% |
| Chironna et al, 1999     | 20   | 526   |  | 0.0380 [0.0234; 0.0581] | 0.3% |
| Rapicetta et al, 1999    | 113  | 973   |  | 0.1161 [0.0967; 0.1380] | 0.3% |
| Schielke et al, 2015     | 26   | 126   |  | 0.2063 [0.1394; 0.2875] | 0.3% |
| Nöbling et al, 2002      | 20   | 511   |  | 0.0391 [0.0241; 0.0598] | 0.3% |
| Todys et al, 2015        | 206  | 1027  |  | 0.2006 [0.1765; 0.2264] | 0.3% |
| Meader et al, 2008       | 10   | 413   |  | 0.0242 [0.0117; 0.0441] | 0.3% |
| Tabili et al, 2013       | 23   | 103   |  | 0.2233 [0.1471; 0.3160] | 0.3% |
| Bura et al, 2018         | 2    | 138   |  | 0.0145 [0.0018; 0.0514] | 0.3% |
| Dremsek et al, 2012      | 132  | 853   |  | 0.1547 [0.1311; 0.1808] | 0.3% |
| Alecci et al, 1997       | 3    | 244   |  | 0.0123 [0.0025; 0.0355] | 0.3% |
| Chaussade et al, 2013    | 83   | 322   |  | 0.2578 [0.2109; 0.3092] | 0.3% |
| Teixeira et al, 2017     | 106  | 804   |  | 0.1318 [0.1092; 0.1572] | 0.3% |

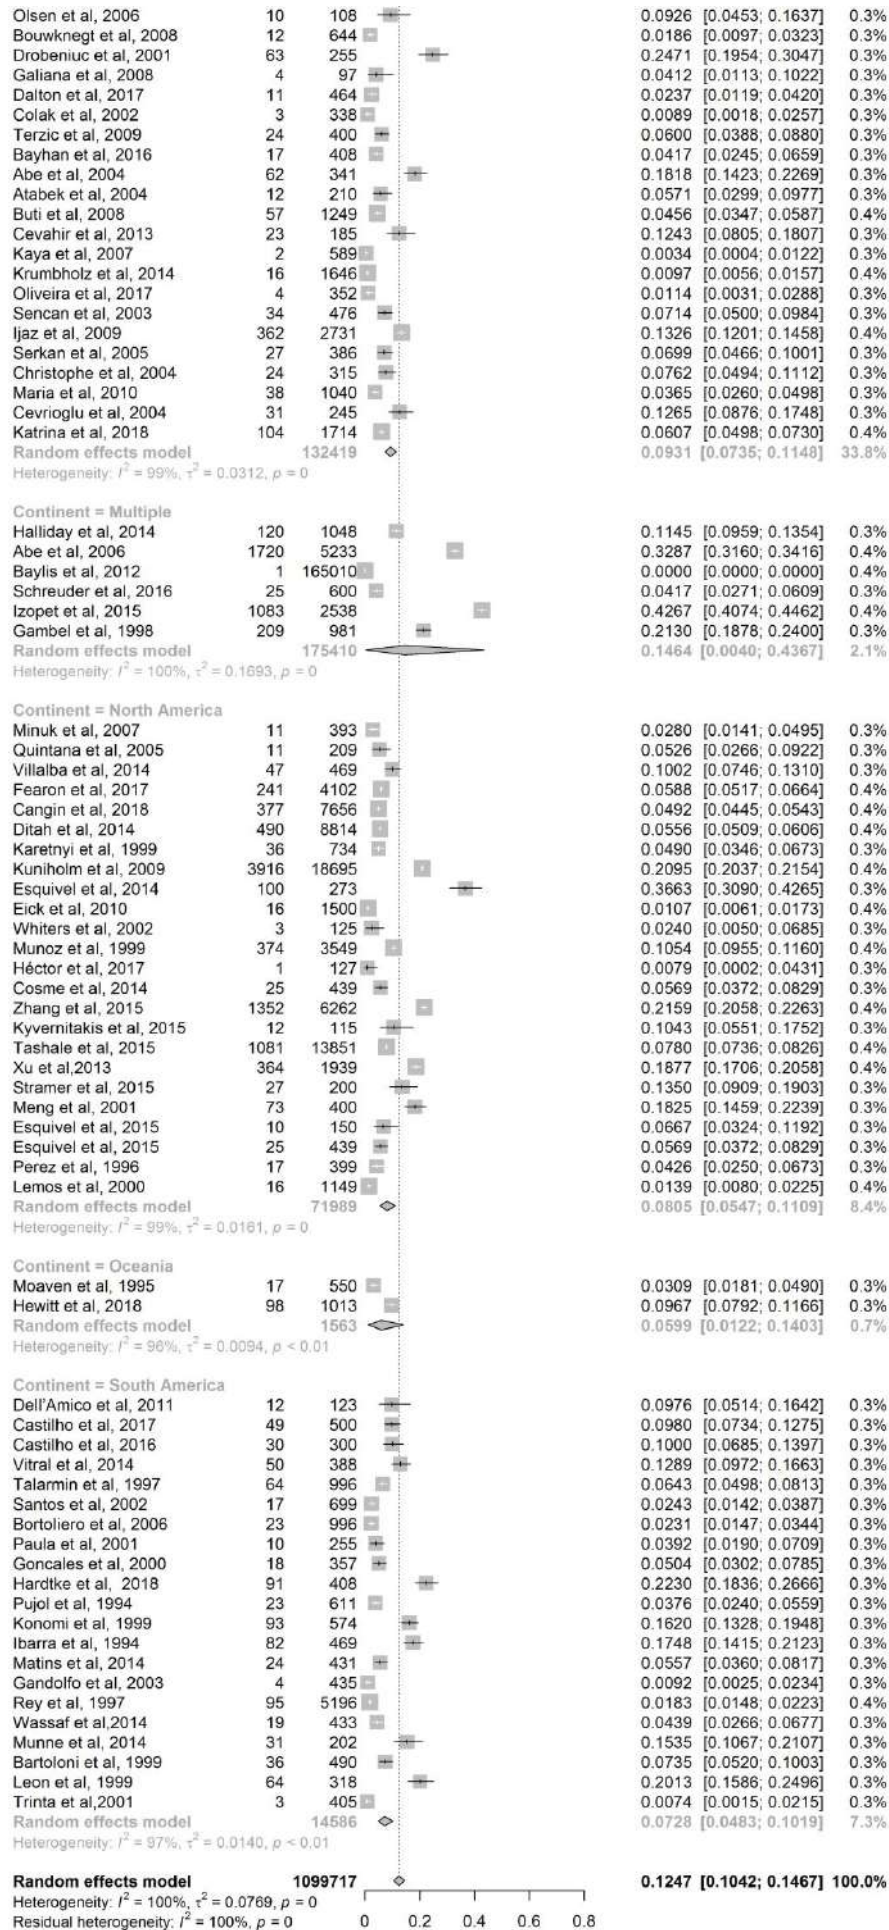



**Figure S5. Forest plot of estimated pooled anti-HEV IgM seroprevalence among general population based on different continents.**

Note: continent named multiple means people in the study are from more than one country and cannot be included into one continent.

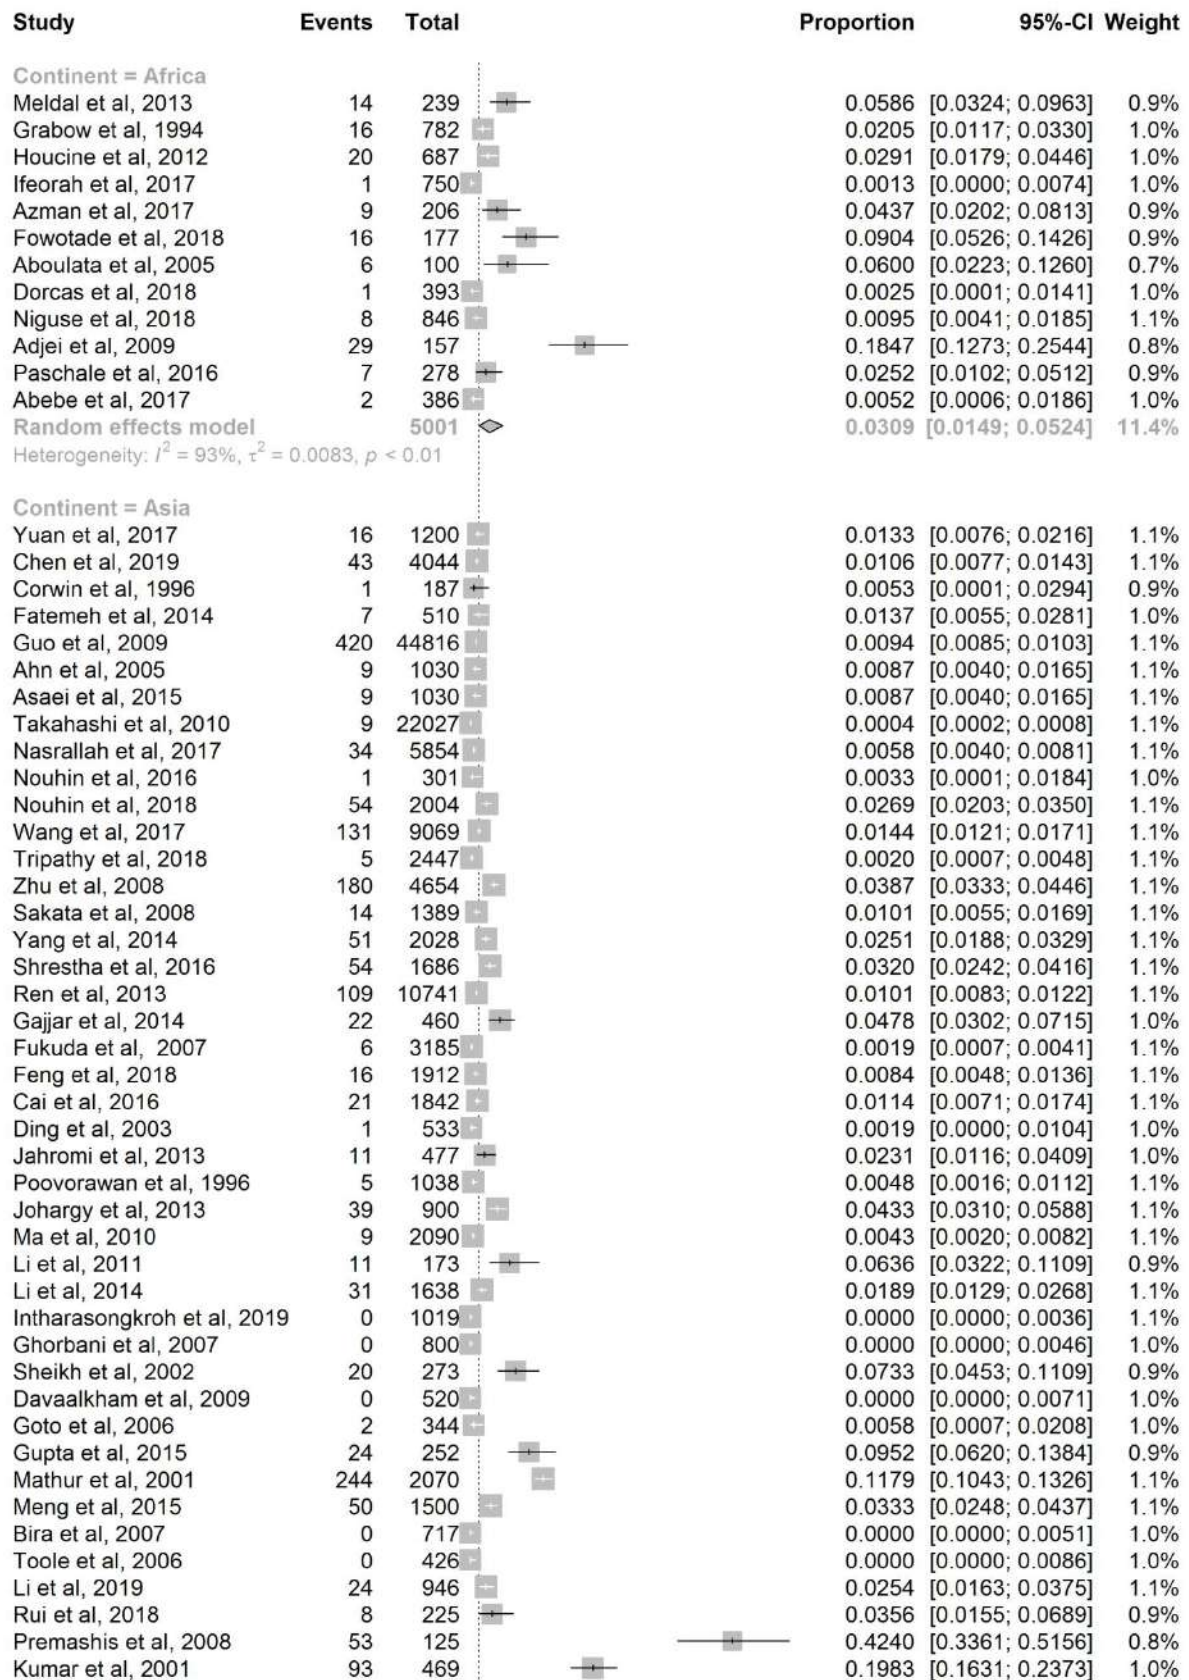

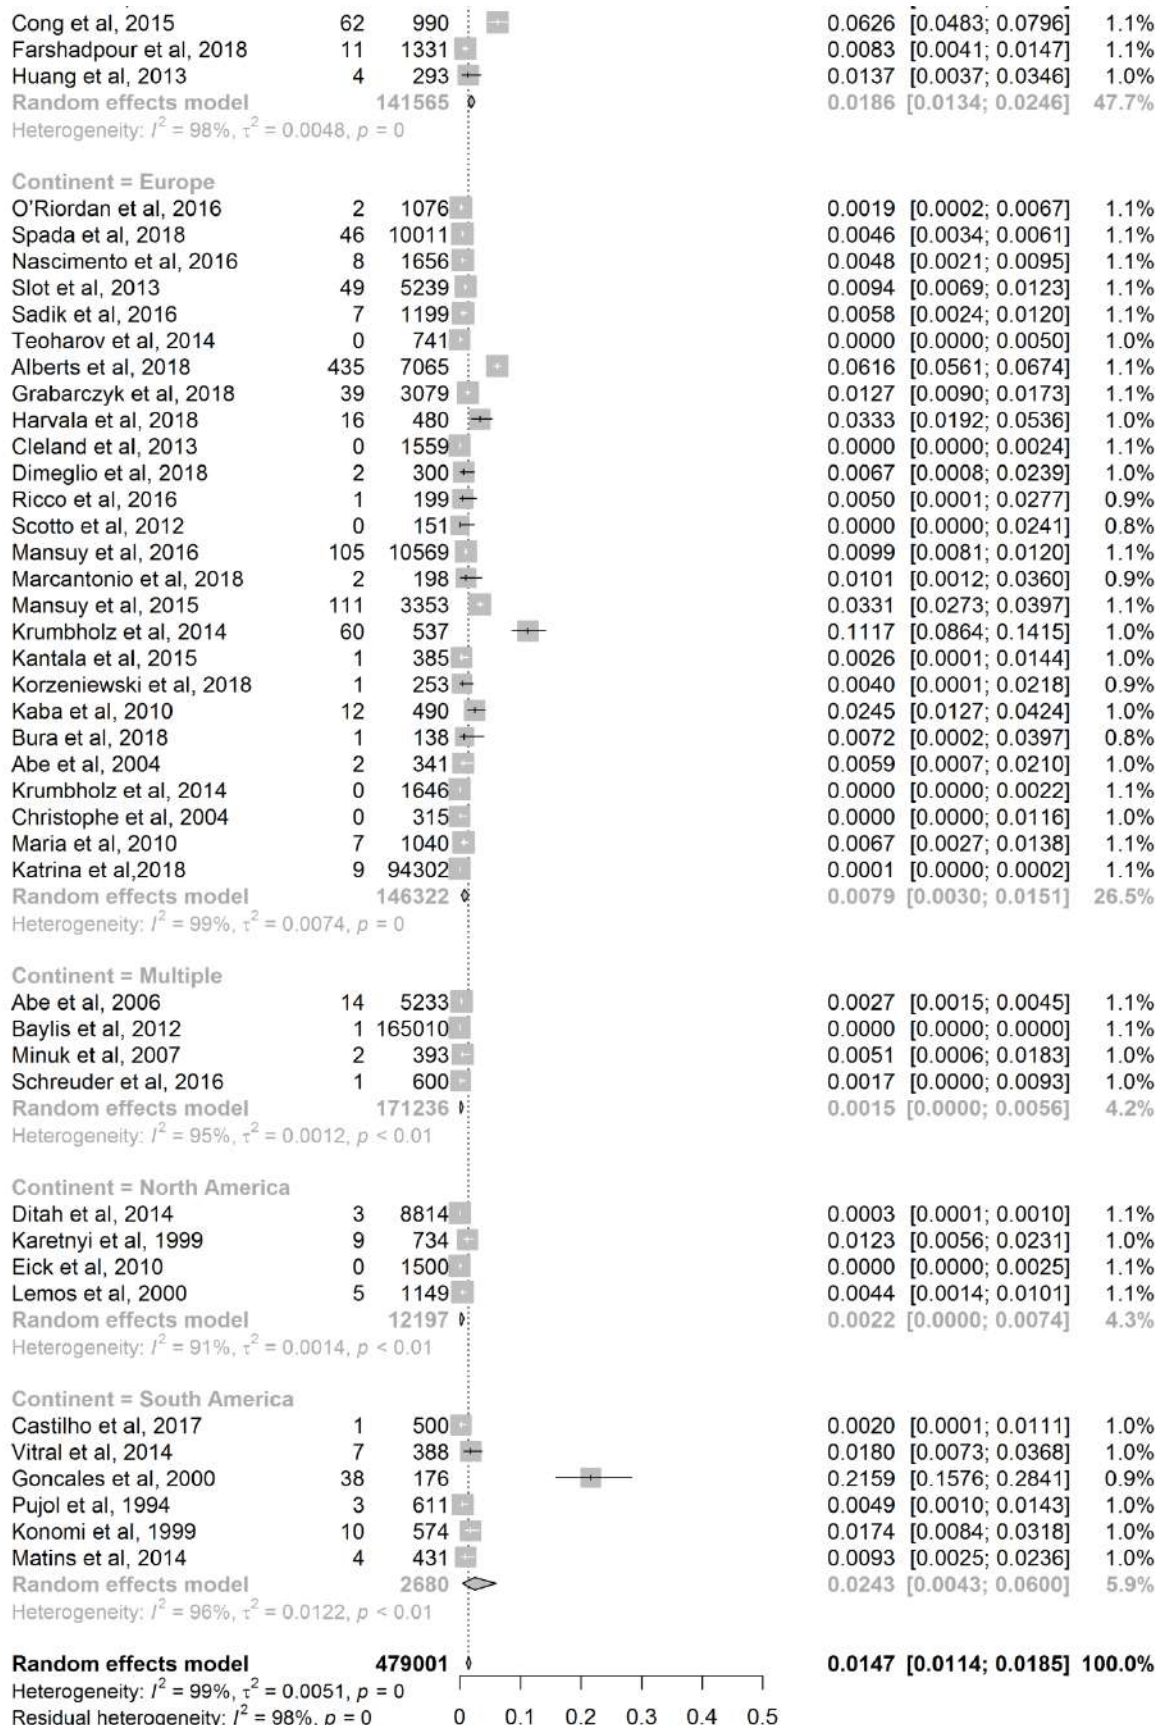



**Figure S6. Forest plot of estimated pooled HEV RNA positive rate among general population based on different continents.**

Note: continent named multiple means people in the study are from more than one country and cannot be included into one continent.

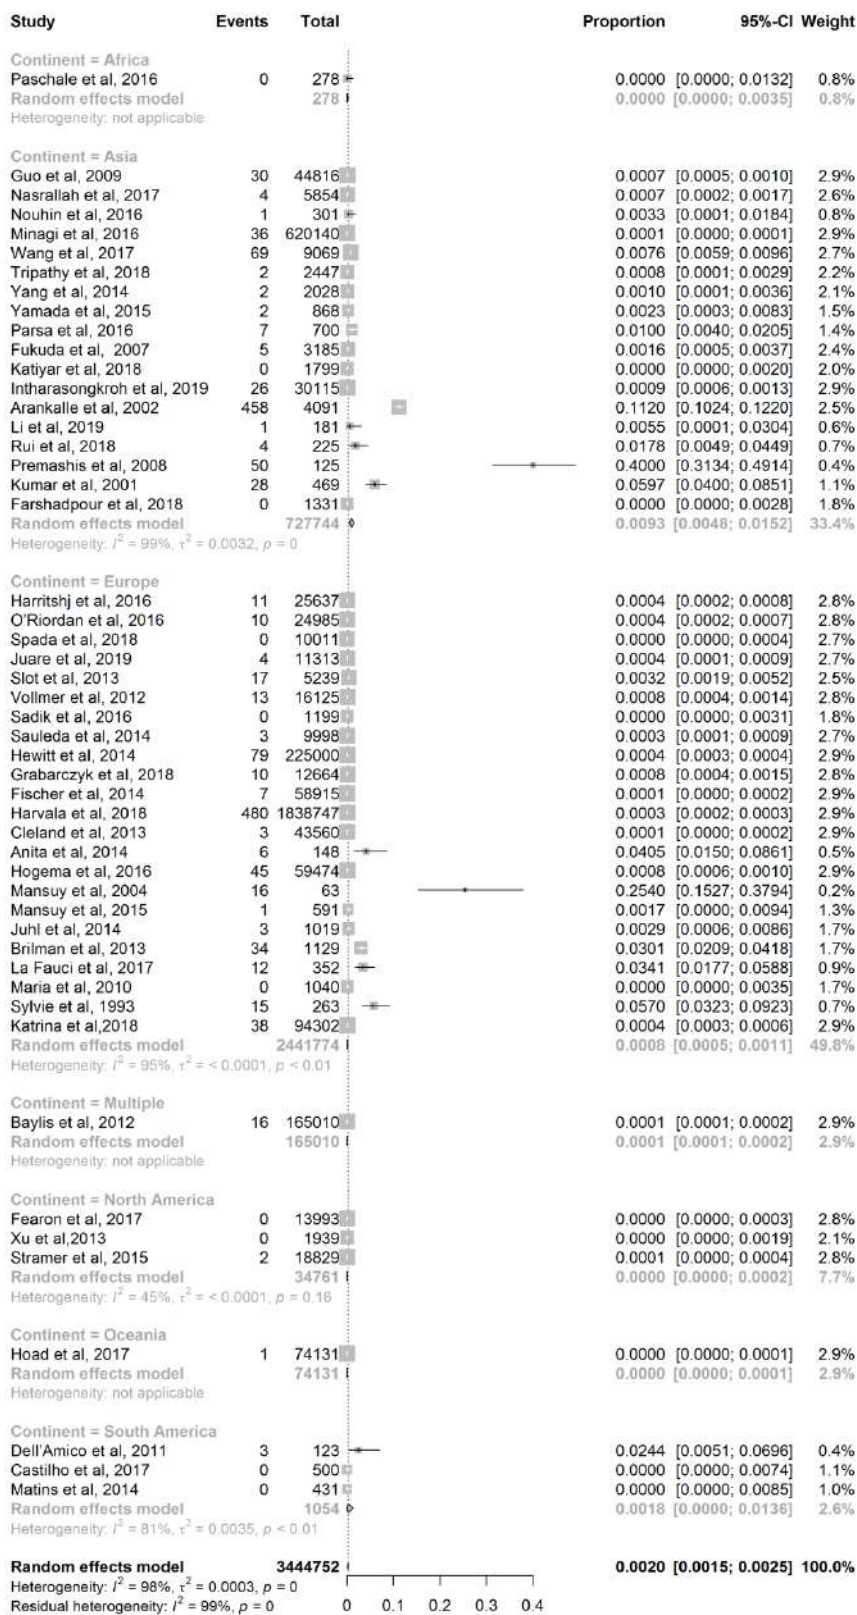

**Figure S7. Forest plot of estimated pooled anti-HEV IgG seroprevalence among general population with different ages.**

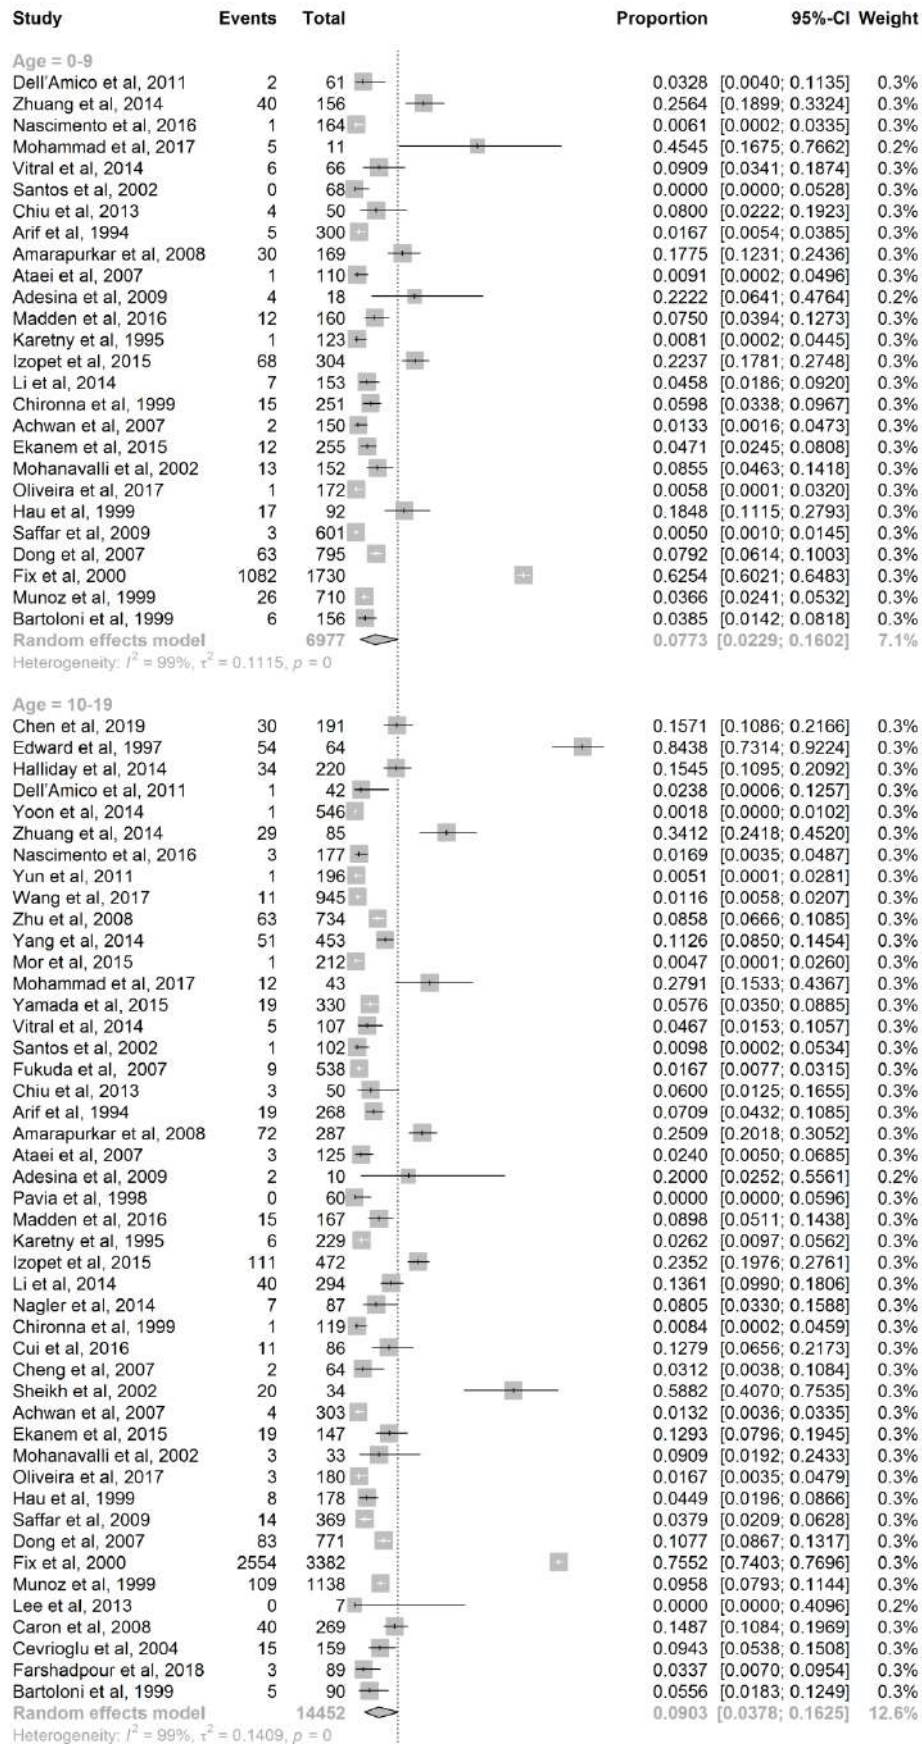



Age = 20-29

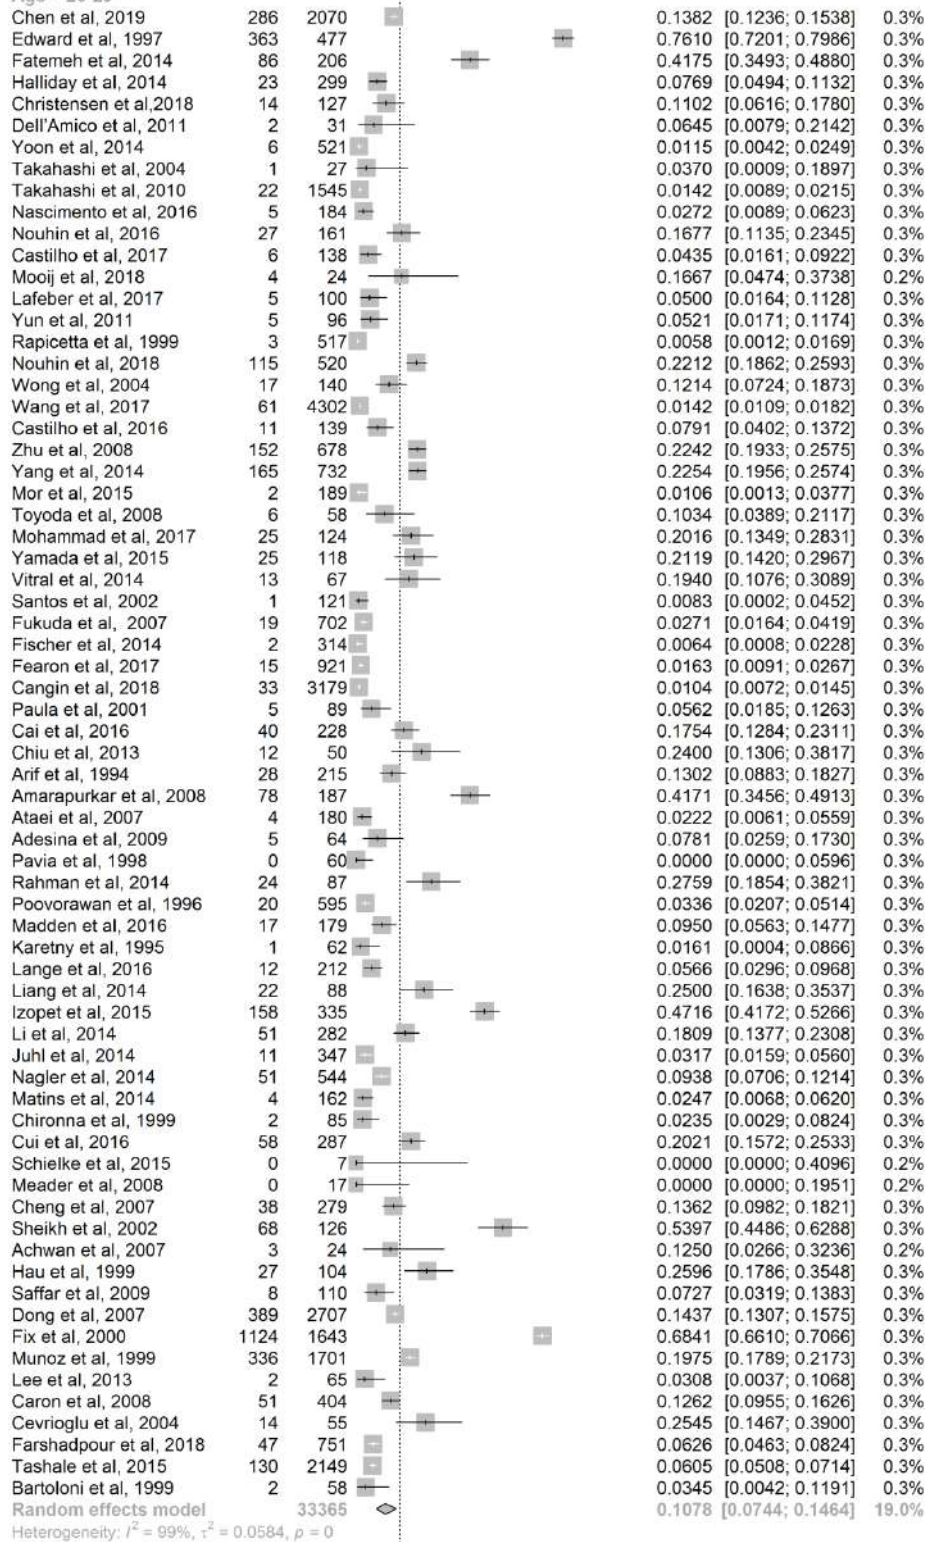

Age = 30-39

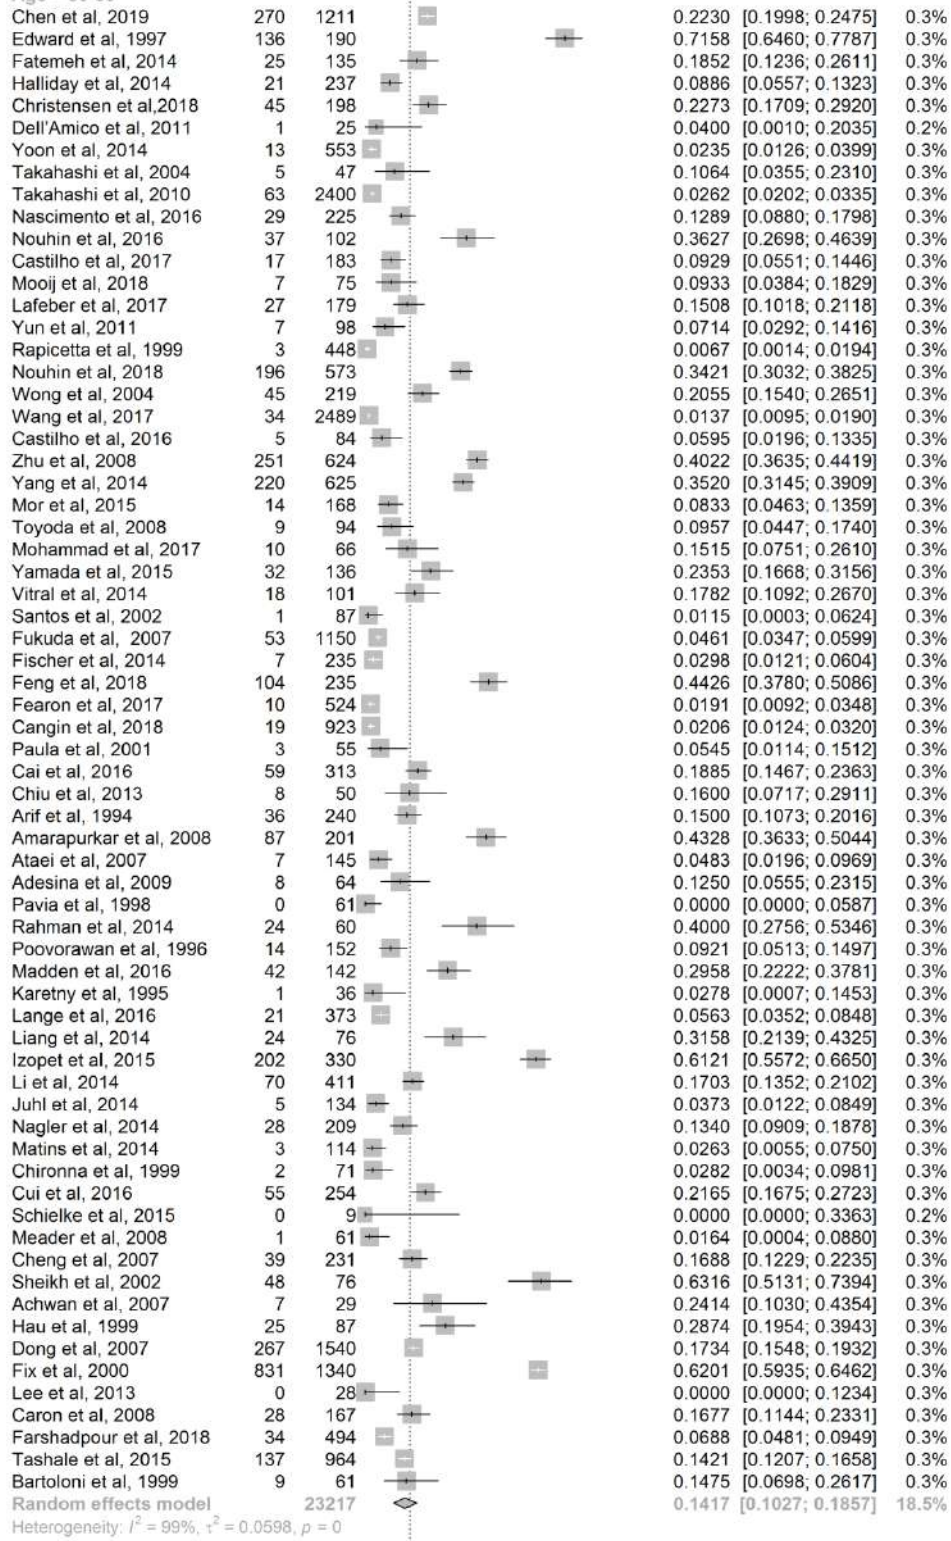



Age = 40-49

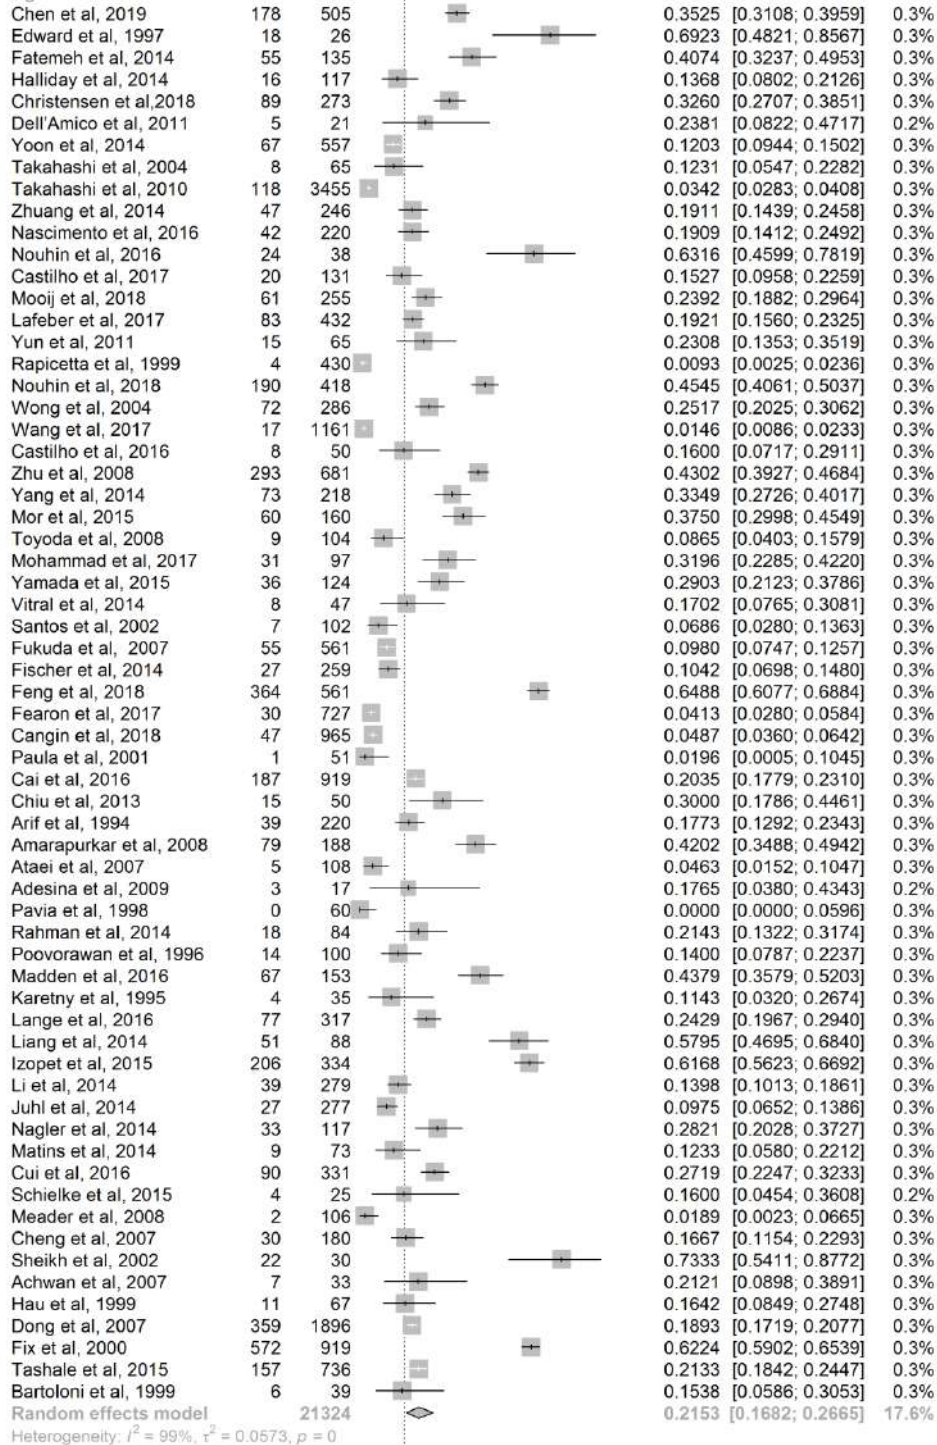

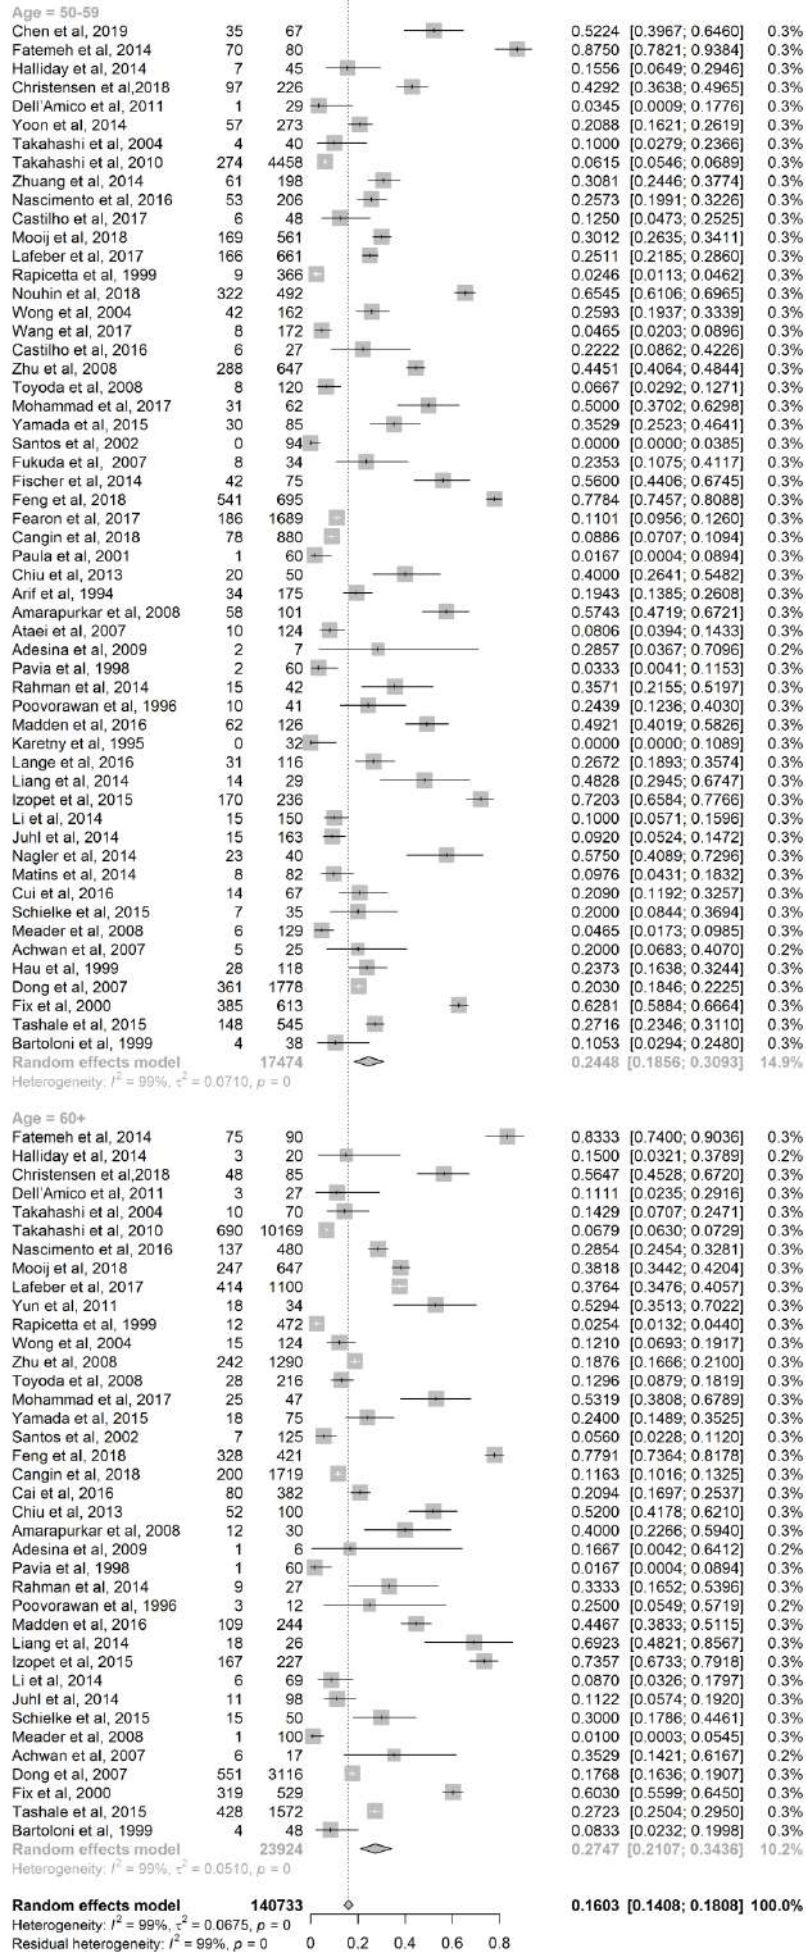



Figure S8. Anti-HEV IgG seroprevalence among different age range for general population from different continents

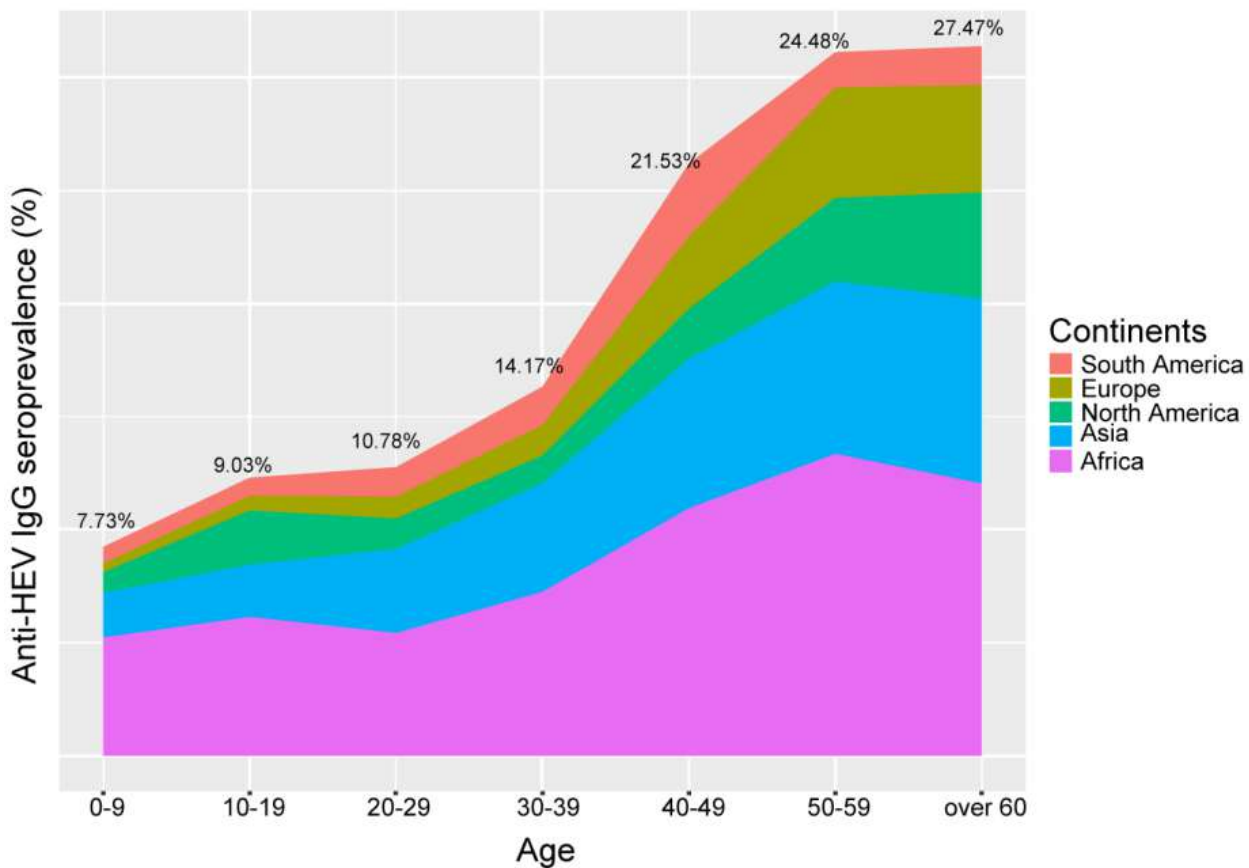

**Figure S9. Forest plot of estimated pooled anti-HEV IgG seroprevalence among general population with different genders.**

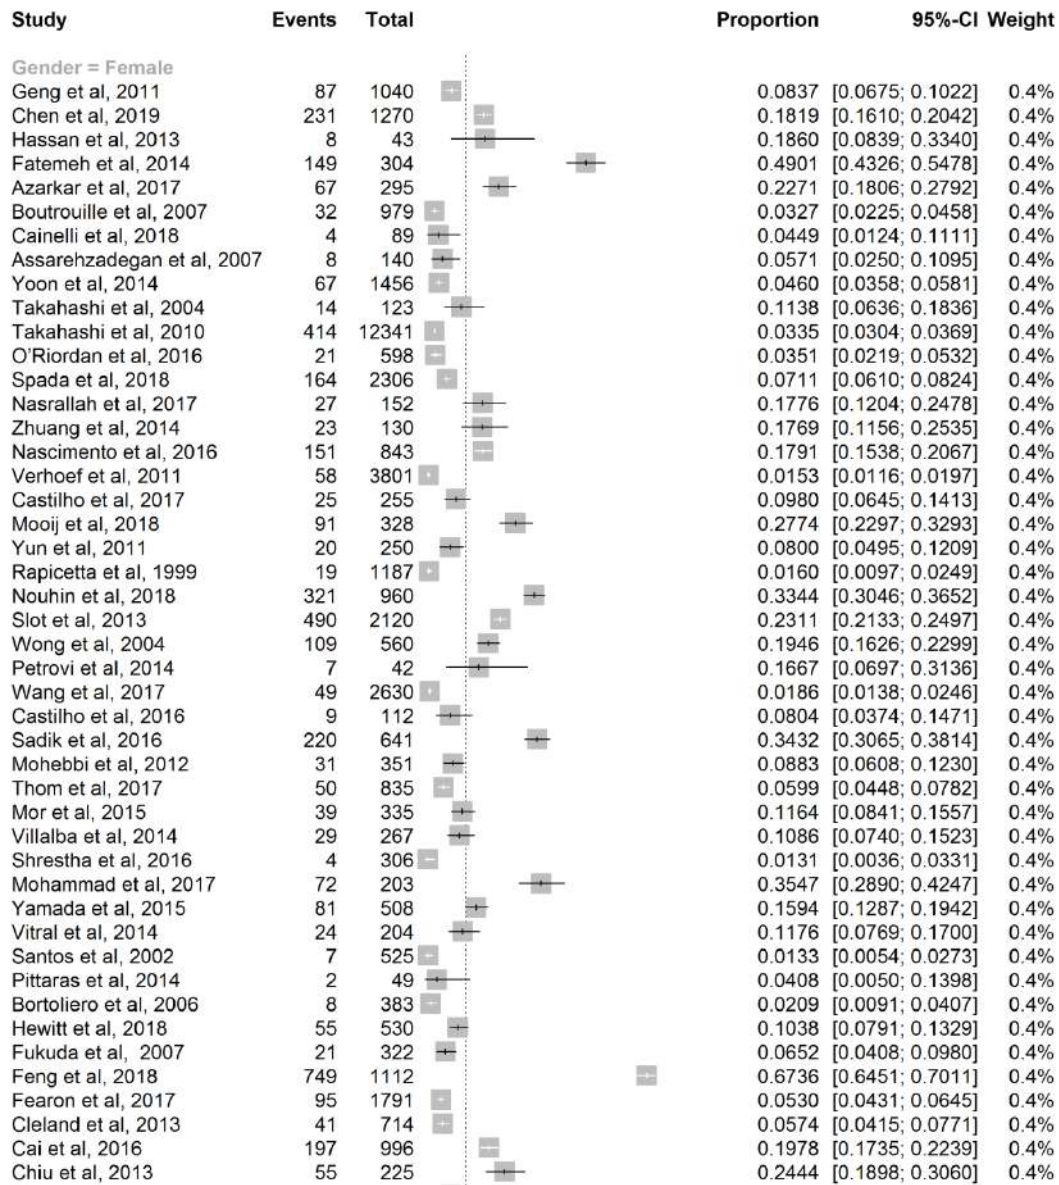

|                         |      |       |  |        |                  |      |
|-------------------------|------|-------|--|--------|------------------|------|
| Arif et al, 1994        | 55   | 663   |  | 0.0830 | [0.0631; 0.1066] | 0.4% |
| Anita et al, 2014       | 4    | 40    |  | 0.1000 | [0.0279; 0.2366] | 0.4% |
| Grabow et al, 1994      | 1    | 98    |  | 0.0102 | [0.0003; 0.0555] | 0.4% |
| Hardtke et al, 2018     | 91   | 408   |  | 0.2230 | [0.1836; 0.2666] | 0.4% |
| Ataei et al, 2007       | 18   | 428   |  | 0.0421 | [0.0251; 0.0657] | 0.4% |
| Hesamizadeh et al, 2015 | 2    | 21    |  | 0.0952 | [0.0117; 0.3038] | 0.3% |
| Hickey et al, 2016      | 6    | 96    |  | 0.0625 | [0.0233; 0.1311] | 0.4% |
| Houcine et al, 2012     | 4    | 126   |  | 0.0317 | [0.0087; 0.0793] | 0.4% |
| Jahromi et al, 2013     | 1    | 30    |  | 0.0333 | [0.0008; 0.1722] | 0.3% |
| Adesina et al, 2009     | 16   | 141   |  | 0.1135 | [0.0663; 0.1777] | 0.4% |
| Bernal et al, 1995      | 26   | 993   |  | 0.0262 | [0.0172; 0.0381] | 0.4% |
| Pavia et al, 1998       | 1    | 77    |  | 0.0130 | [0.0003; 0.0702] | 0.4% |
| Raofi et al, 2012       | 17   | 226   |  | 0.0752 | [0.0444; 0.1177] | 0.4% |
| Rahman et al, 2014      | 42   | 150   |  | 0.2800 | [0.2098; 0.3591] | 0.4% |
| Chen et al, 2012        | 1179 | 5014  |  | 0.2351 | [0.2235; 0.2471] | 0.4% |
| Madden et al, 2016      | 163  | 620   |  | 0.2629 | [0.2286; 0.2994] | 0.4% |
| Mansuy et al, 2016      | 964  | 4946  |  | 0.1949 | [0.1839; 0.2062] | 0.4% |
| Karetny et al, 1995     | 8    | 361   |  | 0.0222 | [0.0096; 0.0432] | 0.4% |
| Lucarelli et al, 2016   | 24   | 61    |  | 0.3934 | [0.2707; 0.5269] | 0.4% |
| Lange et al, 2016       | 75   | 577   |  | 0.1300 | [0.1036; 0.1602] | 0.4% |
| Liang et al, 2014       | 49   | 124   |  | 0.3952 | [0.3086; 0.4869] | 0.4% |
| Marcantonio et al, 2018 | 2    | 45    |  | 0.0444 | [0.0054; 0.1515] | 0.4% |
| Lanini et al, 2015      | 18   | 414   |  | 0.0435 | [0.0260; 0.0678] | 0.4% |
| Jia et al, 2014         | 1751 | 7870  |  | 0.2225 | [0.2133; 0.2318] | 0.4% |
| Kaufmann et al, 2011    | 9    | 218   |  | 0.0413 | [0.0190; 0.0769] | 0.4% |
| Li et al, 2014          | 77   | 702   |  | 0.1097 | [0.0875; 0.1352] | 0.4% |
| Juhl et al, 2014        | 26   | 428   |  | 0.0607 | [0.0401; 0.0877] | 0.4% |
| Nagler et al, 2014      | 3    | 17    |  | 0.1765 | [0.0380; 0.4343] | 0.3% |
| Liu et al, 2019         | 2285 | 6903  |  | 0.3310 | [0.3199; 0.3423] | 0.4% |
| Mahrt et al, 2018       | 312  | 1500  |  | 0.2080 | [0.1877; 0.2294] | 0.4% |
| Kuniholm et al, 2009    | 2065 | 10124 |  | 0.2040 | [0.1962; 0.2120] | 0.4% |
| Krumbholz et al, 2011   | 21   | 90    |  | 0.2333 | [0.1506; 0.3343] | 0.4% |
| Jeggli et al, 2015      | 1    | 349   |  | 0.0029 | [0.0001; 0.0159] | 0.4% |
| Kang et al, 2017        | 227  | 411   |  | 0.5523 | [0.5028; 0.6011] | 0.4% |
| Matins et al, 2014      | 12   | 269   |  | 0.0446 | [0.0233; 0.0766] | 0.4% |
| Jahanbakhsh et al, 2017 | 124  | 484   |  | 0.2562 | [0.2179; 0.2975] | 0.4% |
| Rapicetta et al, 1999   | 14   | 126   |  | 0.1111 | [0.0621; 0.1794] | 0.4% |
| Esquivel et al, 2014    | 70   | 204   |  | 0.3431 | [0.2783; 0.4127] | 0.4% |
| Cui et al, 2016         | 111  | 521   |  | 0.2131 | [0.1786; 0.2508] | 0.4% |
| Schielke et al, 2015    | 2    | 8     |  | 0.2500 | [0.0319; 0.6509] | 0.2% |
| Meader et al, 2008      | 1    | 117   |  | 0.0085 | [0.0002; 0.0467] | 0.4% |
| Whiters et al, 2002     | 5    | 89    |  | 0.0562 | [0.0185; 0.1263] | 0.4% |
| Widasari et al, 2013    | 19   | 208   |  | 0.0913 | [0.0559; 0.1390] | 0.4% |
| Galiana et al, 2008     | 2    | 97    |  | 0.0206 | [0.0025; 0.0725] | 0.4% |
| Cheng et al, 2007       | 84   | 510   |  | 0.1647 | [0.1336; 0.1998] | 0.4% |
| Cong et al, 2014        | 98   | 476   |  | 0.2059 | [0.1704; 0.2450] | 0.4% |
| Bayhan et al, 2016      | 8    | 179   |  | 0.0447 | [0.0195; 0.0862] | 0.4% |
| Achwan et al, 2007      | 21   | 322   |  | 0.0652 | [0.0408; 0.0980] | 0.4% |
| Buti et al, 2008        | 35   | 607   |  | 0.0577 | [0.0405; 0.0793] | 0.4% |
| Davaalkham et al, 2009  | 1    | 223   |  | 0.0045 | [0.0001; 0.0247] | 0.4% |
| Ekanem et al, 2015      | 17   | 205   |  | 0.0829 | [0.0491; 0.1295] | 0.4% |
| Meng et al, 2015        | 103  | 784   |  | 0.1314 | [0.1085; 0.1571] | 0.4% |



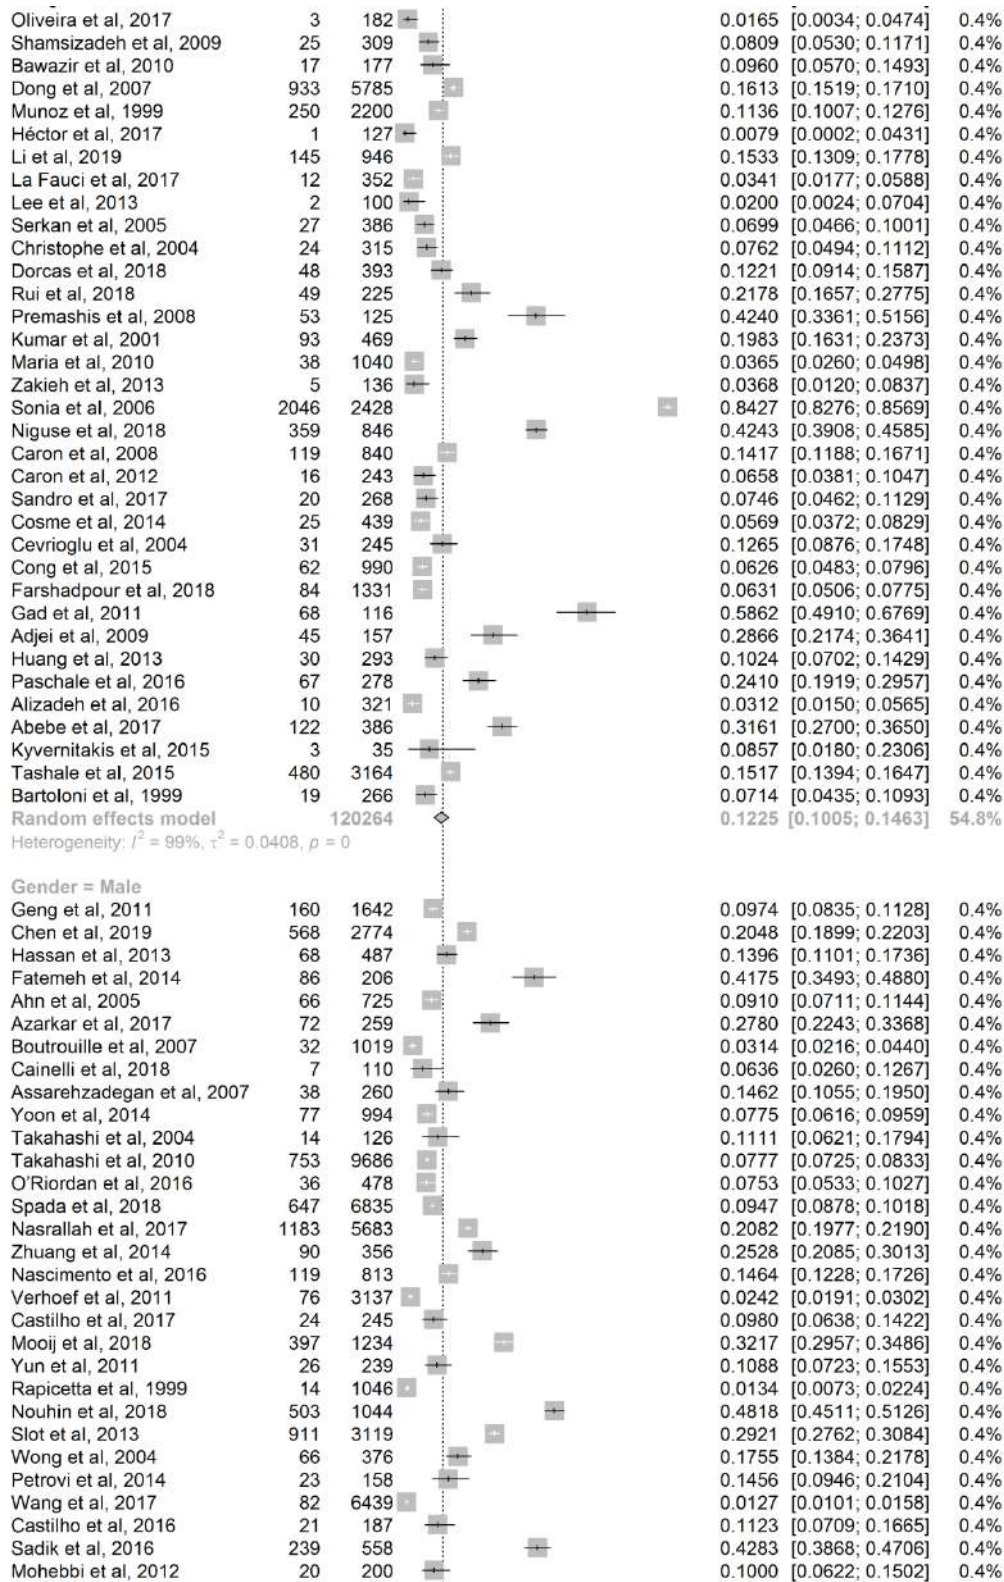

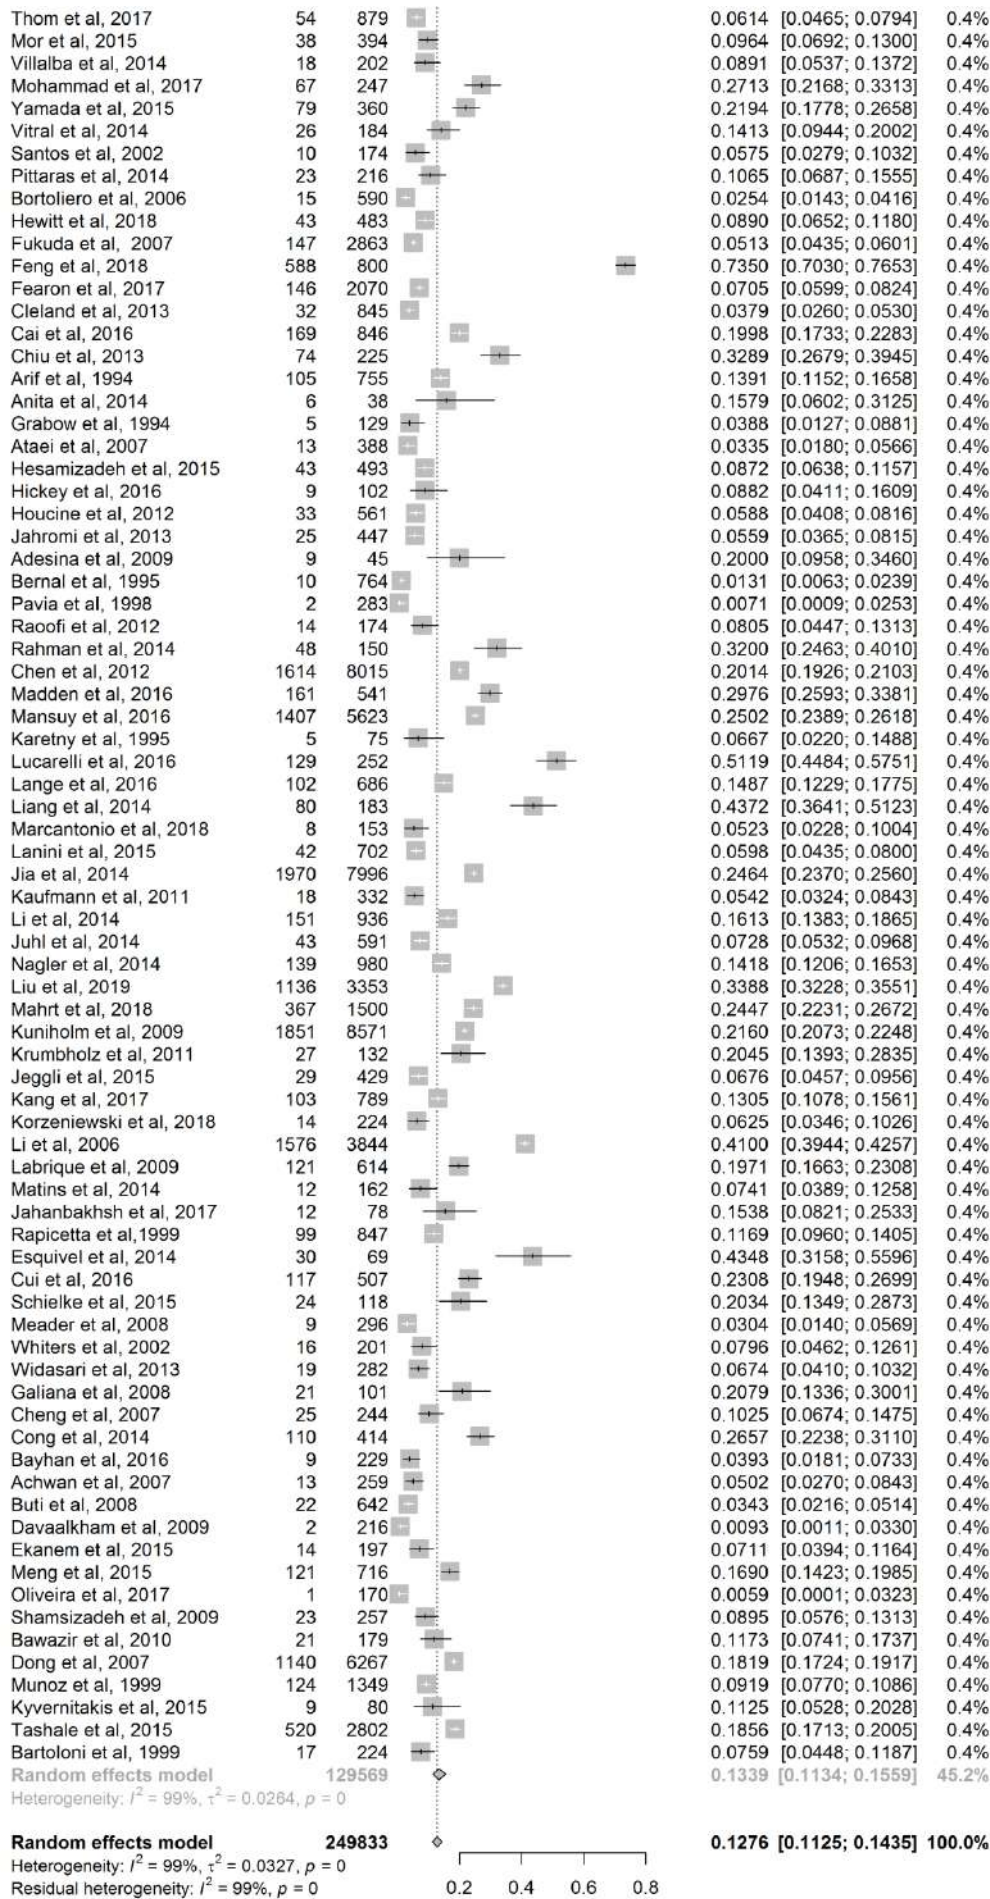



**Figure S10. Forest plot of estimated pooled anti-HEV IgG seroprevalence among general population based on high income countries, upper-middle income countries, lower middle income countries, and low income countries.**

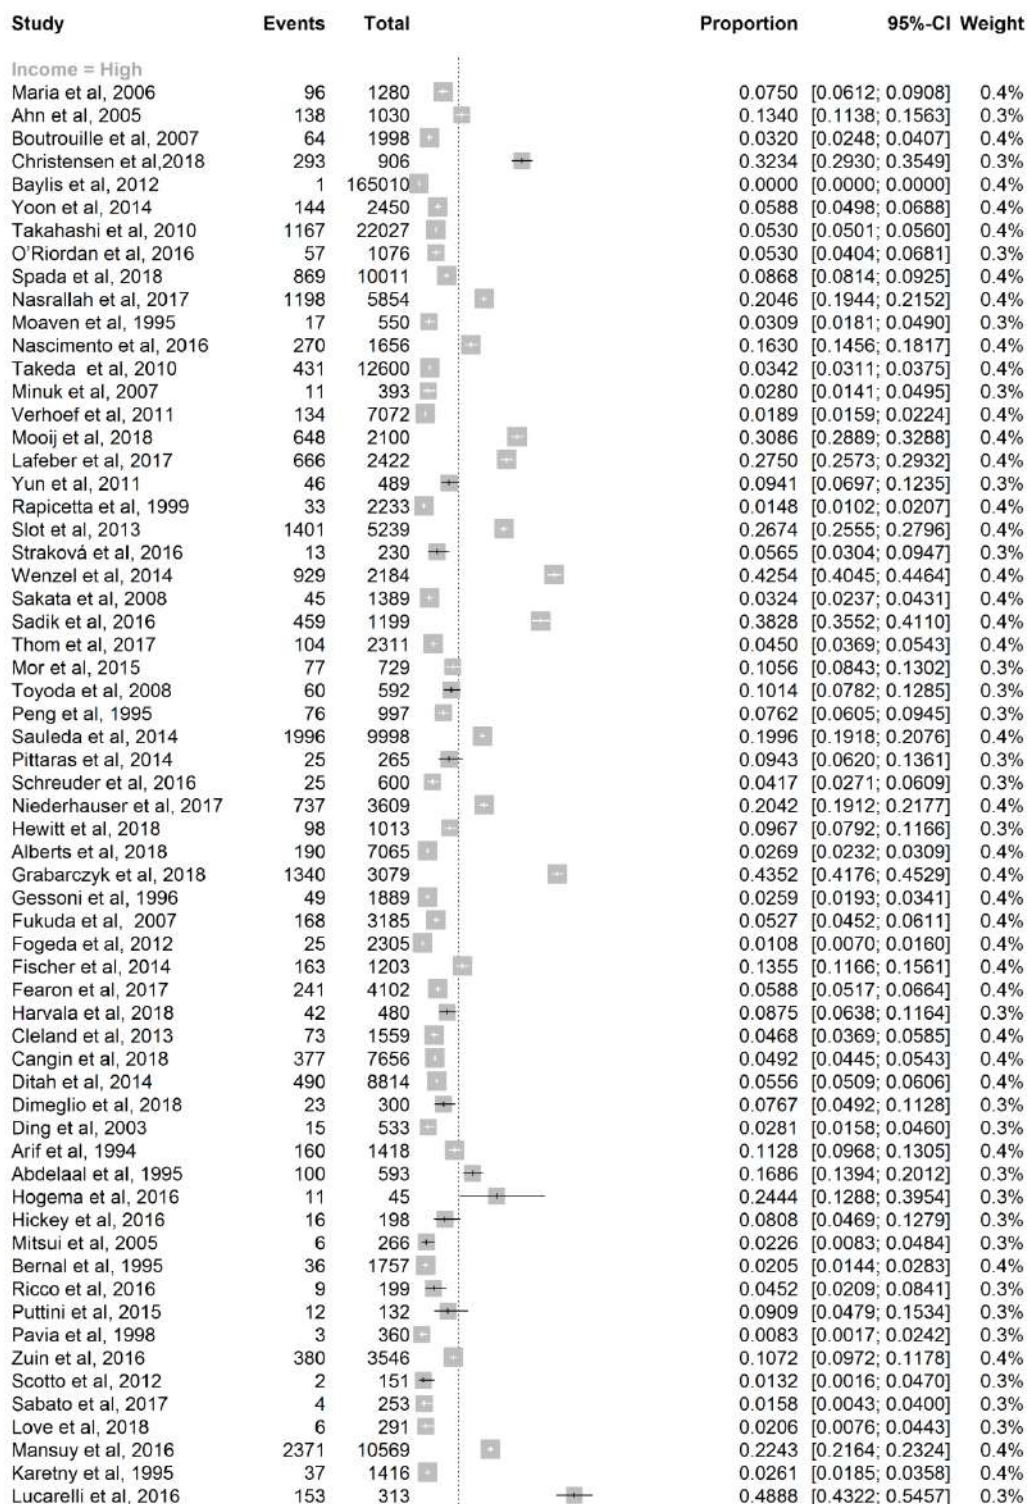

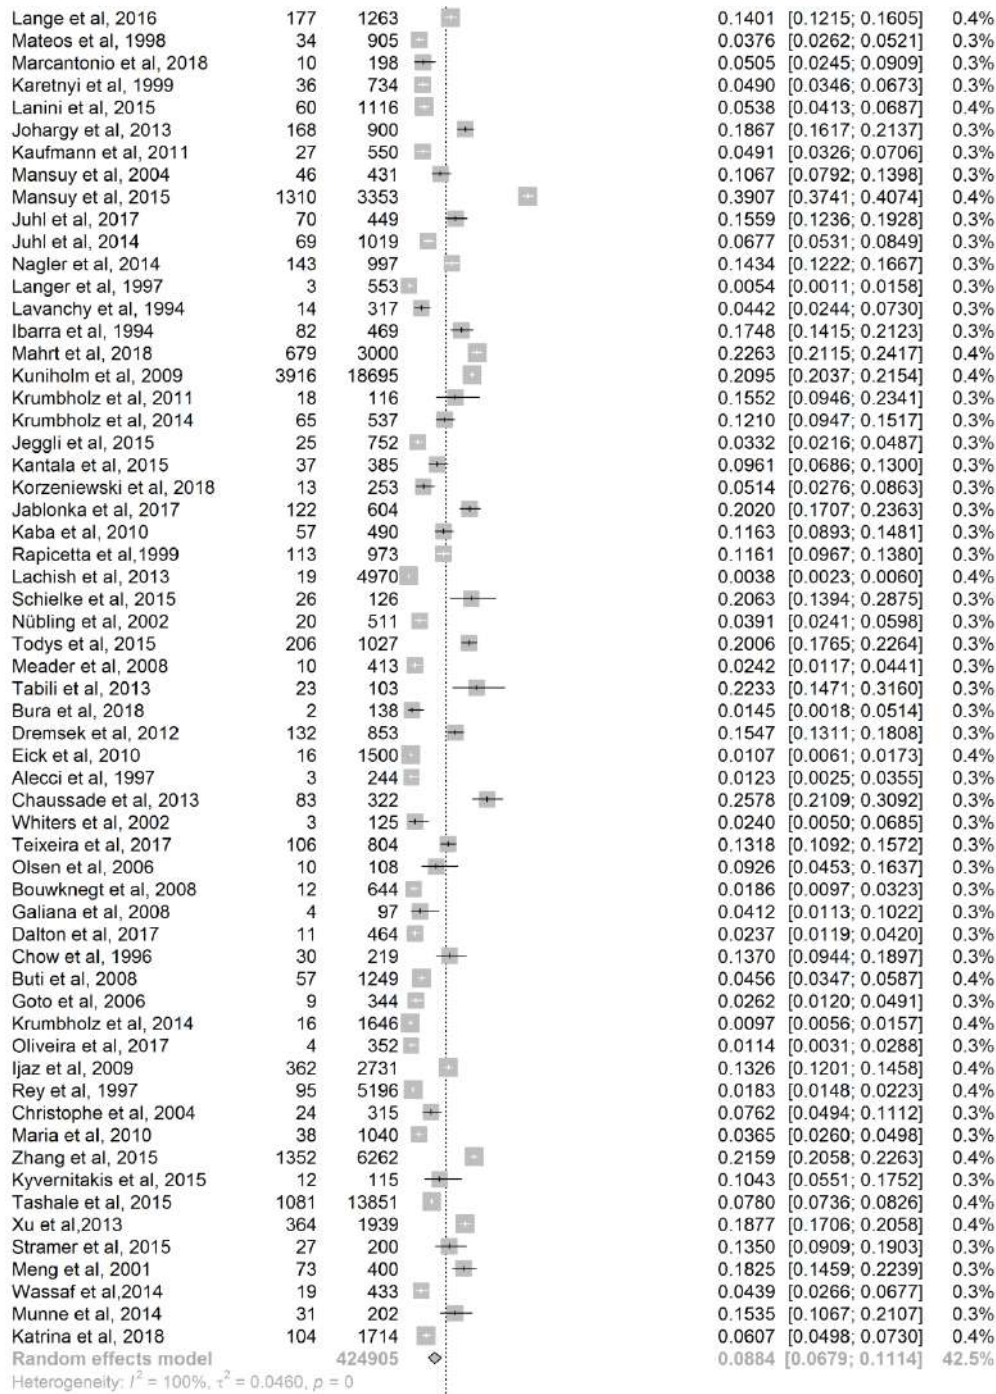



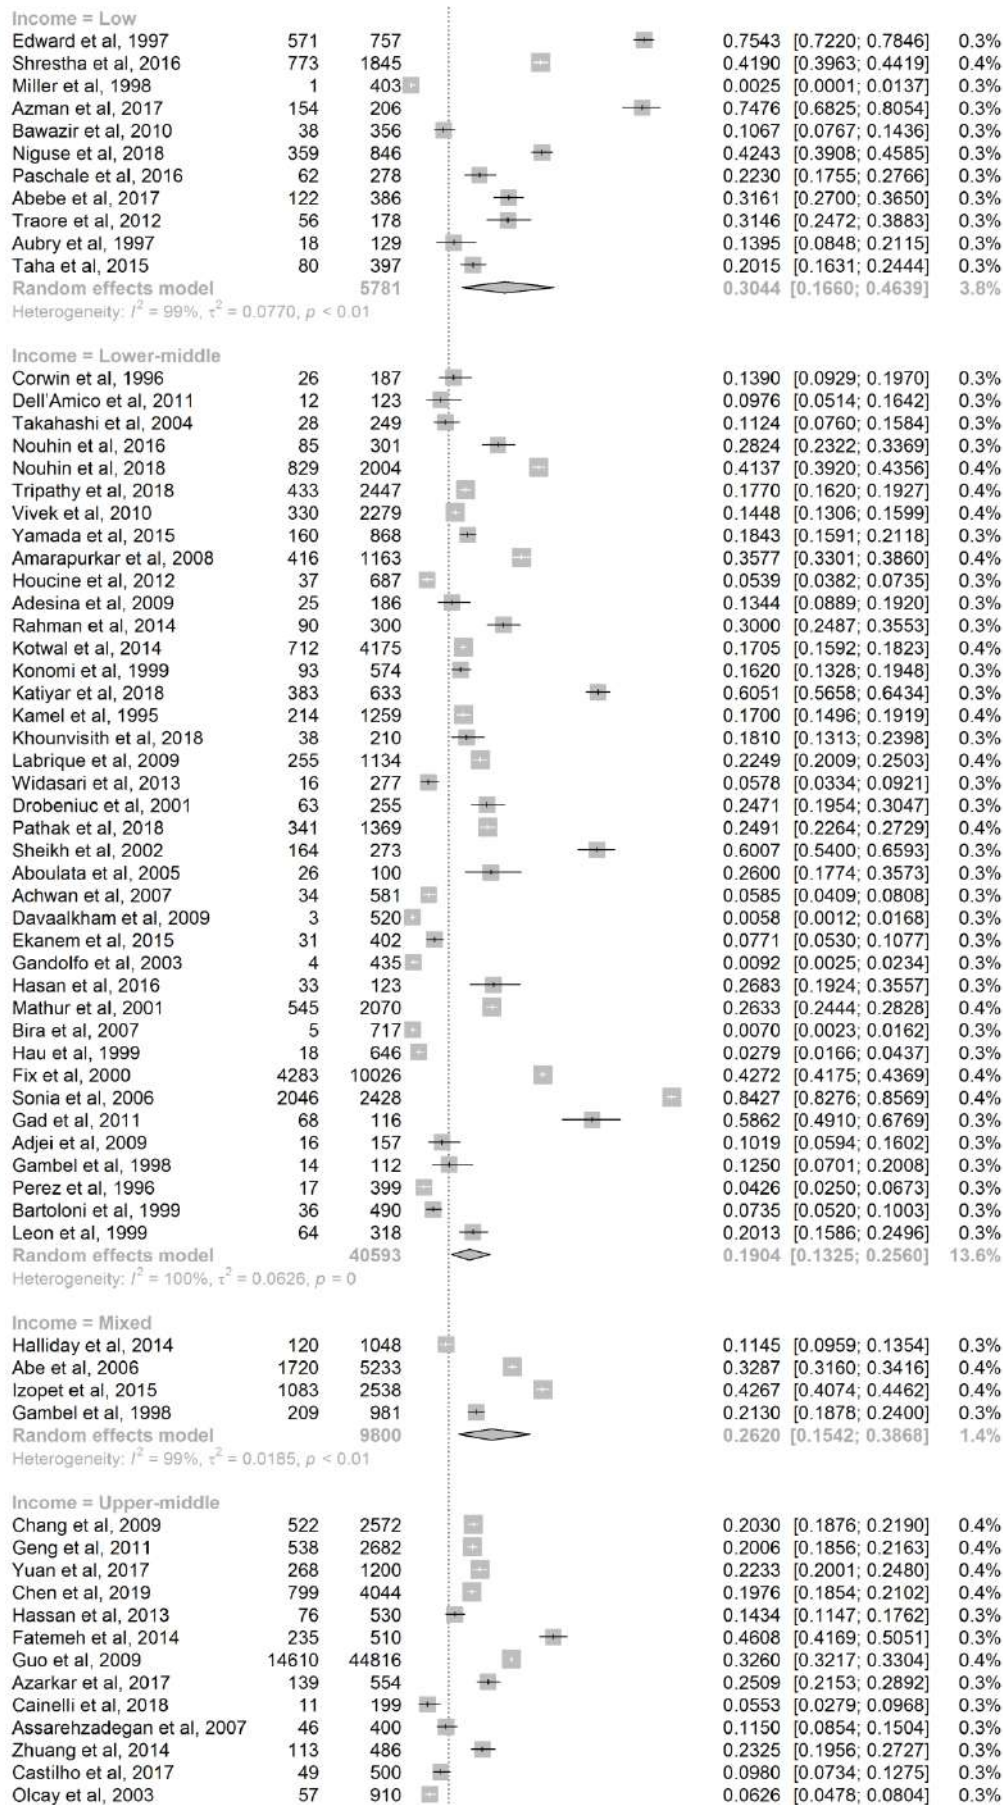



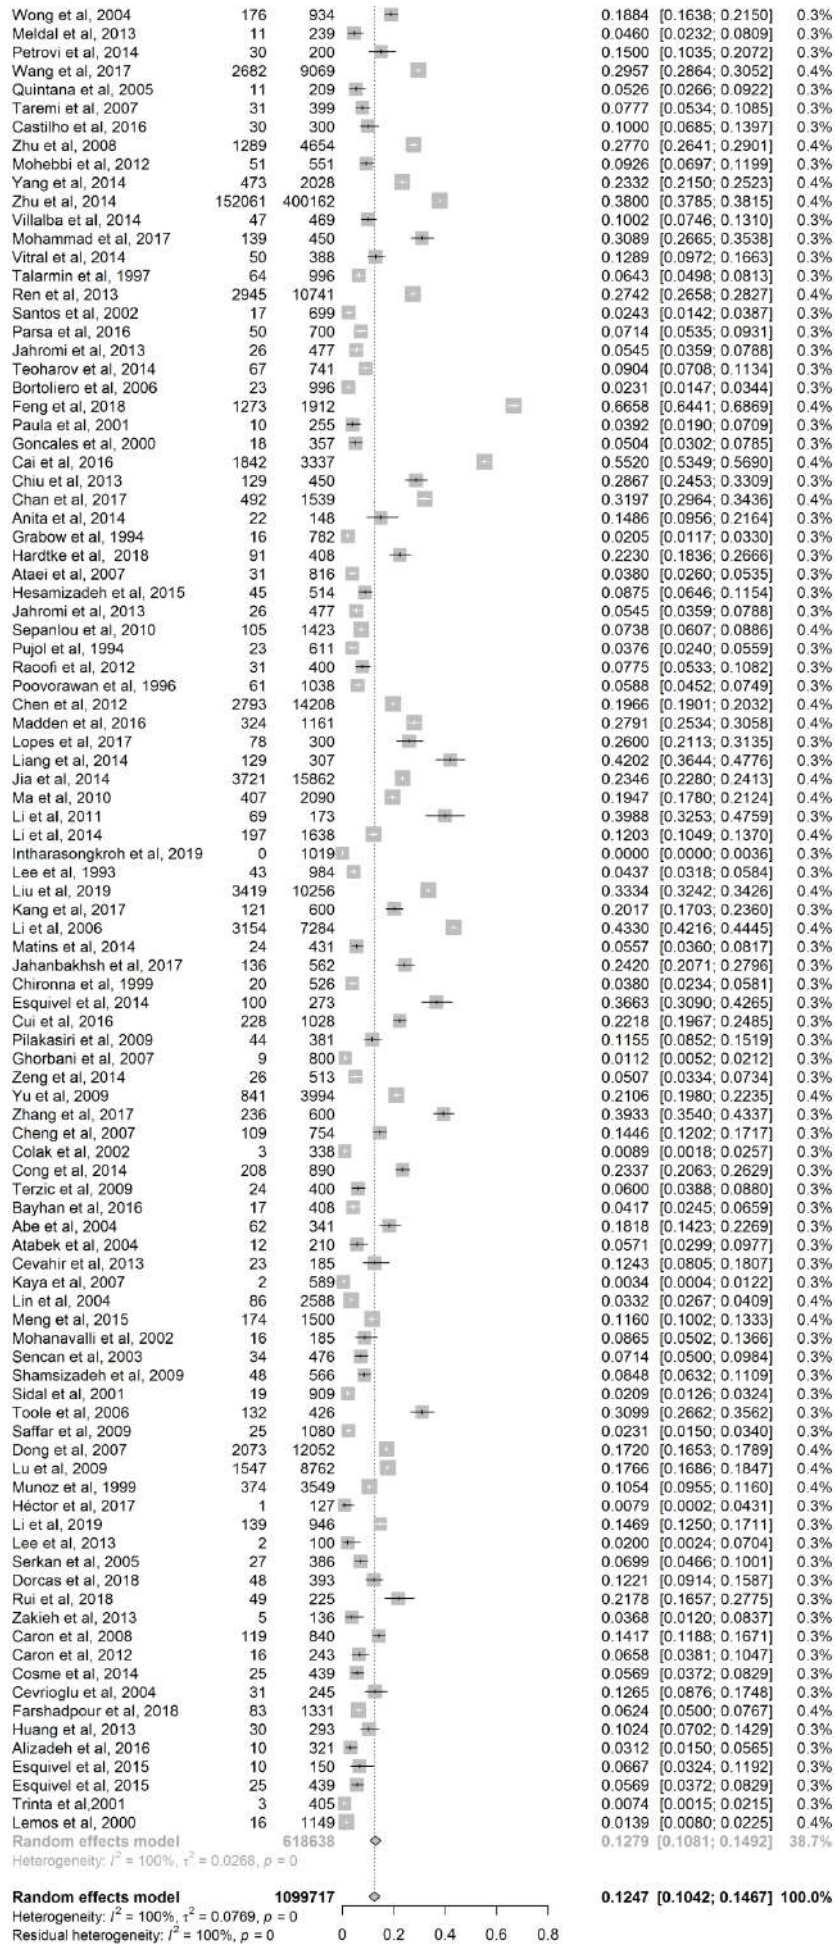

**Figure S11. Forest plot of estimated pooled anti-HEV IgG seroprevalence among general population based on developed countries and developing countries.**

Note: subgroup named mixed means study contained people from several different countries and thus cannot be divided into developed country or developing country.

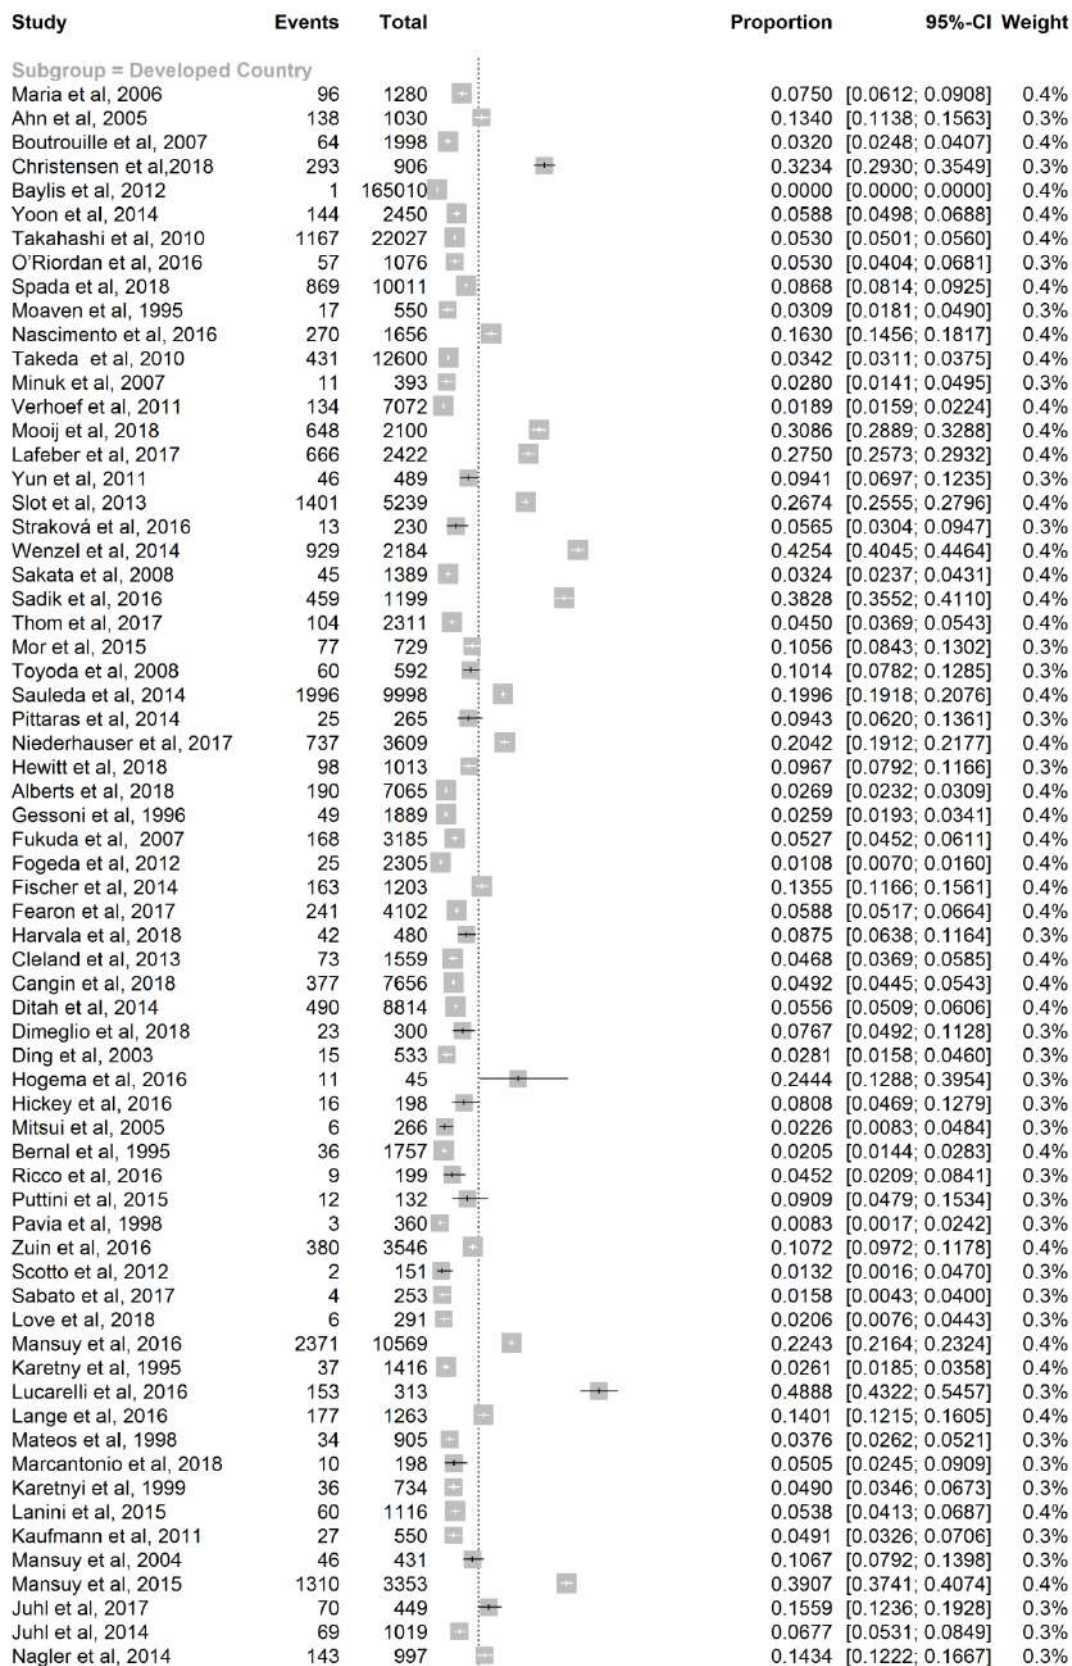



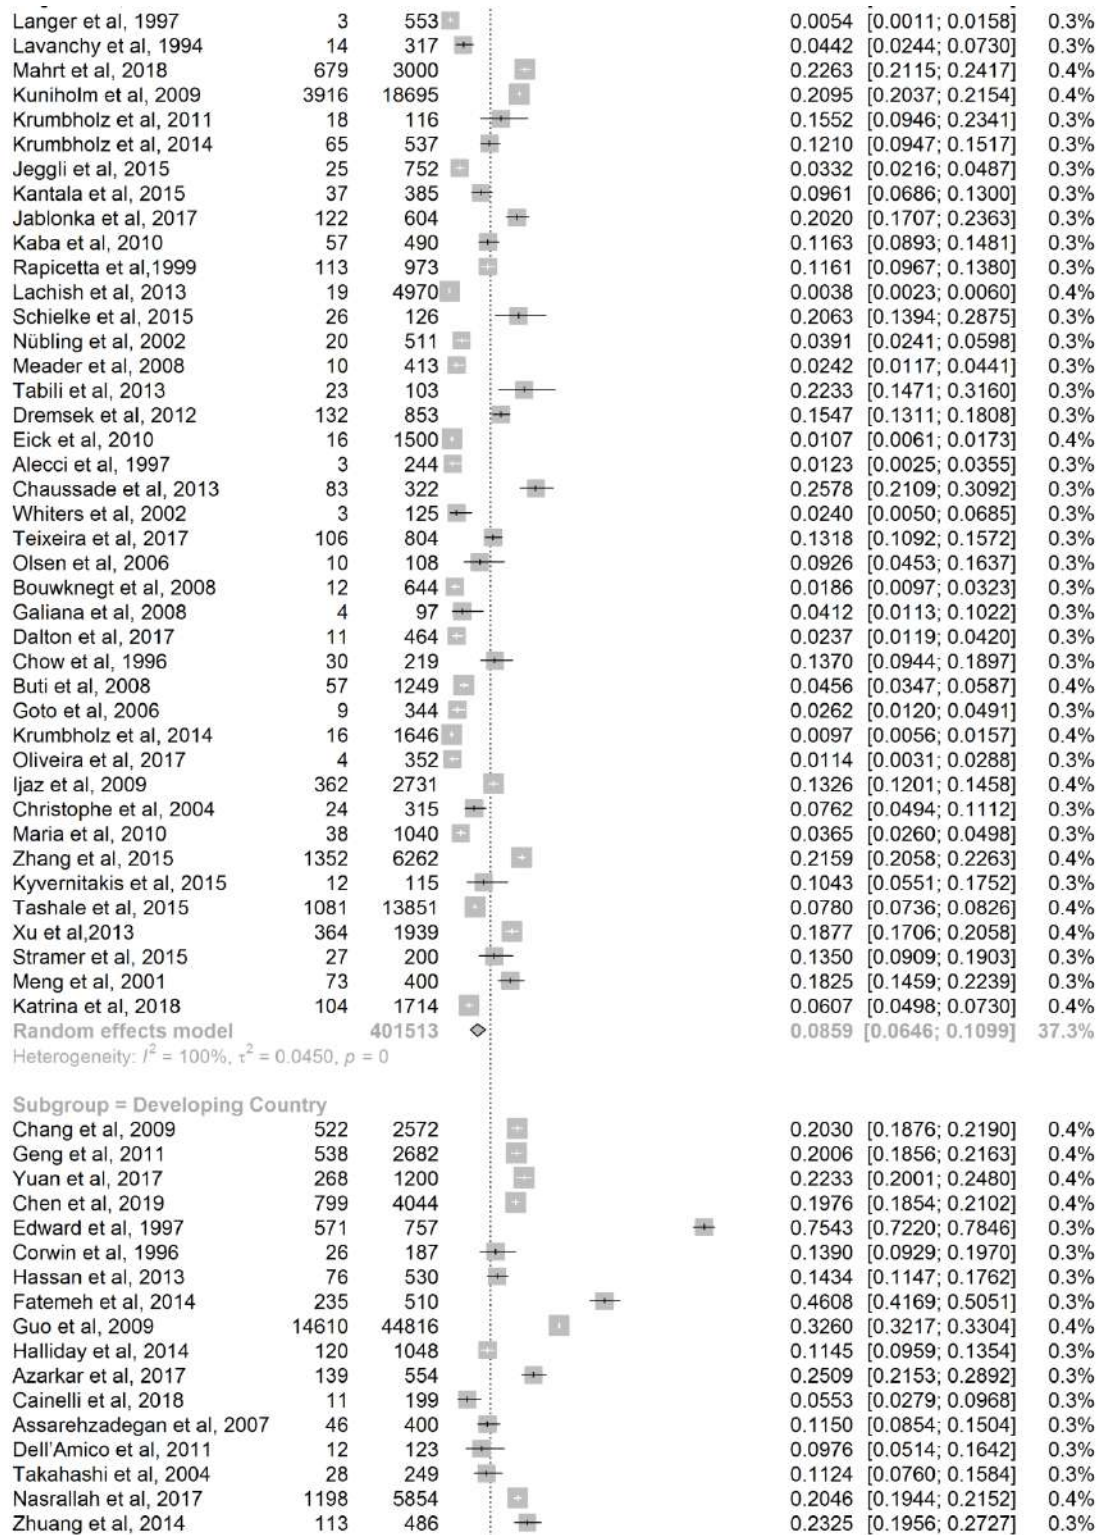

|                             |        |        |  |        |                  |      |
|-----------------------------|--------|--------|--|--------|------------------|------|
| Nouhin et al, 2016          | 85     | 301    |  | 0.2824 | [0.2322; 0.3369] | 0.3% |
| Castilho et al, 2017        | 49     | 500    |  | 0.0980 | [0.0734; 0.1275] | 0.3% |
| Olcay et al, 2003           | 57     | 910    |  | 0.0626 | [0.0478; 0.0804] | 0.3% |
| Rapicetta et al, 1999       | 33     | 2233   |  | 0.0148 | [0.0102; 0.0207] | 0.4% |
| Nouhin et al, 2018          | 829    | 2004   |  | 0.4137 | [0.3920; 0.4356] | 0.4% |
| Wong et al, 2004            | 176    | 934    |  | 0.1884 | [0.1638; 0.2150] | 0.3% |
| Meldal et al, 2013          | 11     | 239    |  | 0.0460 | [0.0232; 0.0809] | 0.3% |
| Petrovi et al, 2014         | 30     | 200    |  | 0.1500 | [0.1035; 0.2072] | 0.3% |
| Wang et al, 2017            | 2682   | 9069   |  | 0.2957 | [0.2864; 0.3052] | 0.4% |
| Tripathy et al, 2018        | 433    | 2447   |  | 0.1770 | [0.1620; 0.1927] | 0.4% |
| Quintana et al, 2005        | 11     | 209    |  | 0.0526 | [0.0266; 0.0922] | 0.3% |
| Taremi et al, 2007          | 31     | 399    |  | 0.0777 | [0.0534; 0.1085] | 0.3% |
| Castilho et al, 2016        | 30     | 300    |  | 0.1000 | [0.0685; 0.1397] | 0.3% |
| Vivek et al, 2010           | 330    | 2279   |  | 0.1448 | [0.1306; 0.1599] | 0.4% |
| Zhu et al, 2008             | 1289   | 4654   |  | 0.2770 | [0.2641; 0.2901] | 0.4% |
| Mohebbi et al, 2012         | 51     | 551    |  | 0.0926 | [0.0697; 0.1199] | 0.3% |
| Yang et al, 2014            | 473    | 2028   |  | 0.2332 | [0.2150; 0.2523] | 0.4% |
| Zhu et al, 2014             | 152061 | 400162 |  | 0.3800 | [0.3785; 0.3815] | 0.4% |
| Villalba et al, 2014        | 47     | 469    |  | 0.1002 | [0.0746; 0.1310] | 0.3% |
| Shrestha et al, 2016        | 773    | 1845   |  | 0.4190 | [0.3963; 0.4419] | 0.4% |
| Mohammad et al, 2017        | 139    | 450    |  | 0.3089 | [0.2665; 0.3538] | 0.3% |
| Yamada et al, 2015          | 160    | 868    |  | 0.1843 | [0.1591; 0.2118] | 0.3% |
| Vitral et al, 2014          | 50     | 388    |  | 0.1289 | [0.0972; 0.1663] | 0.3% |
| Peng et al, 1995            | 76     | 997    |  | 0.0762 | [0.0605; 0.0945] | 0.3% |
| Talarmin et al, 1997        | 64     | 996    |  | 0.0643 | [0.0498; 0.0813] | 0.3% |
| Ren et al, 2013             | 2945   | 10741  |  | 0.2742 | [0.2658; 0.2827] | 0.4% |
| Santos et al, 2002          | 17     | 699    |  | 0.0243 | [0.0142; 0.0387] | 0.3% |
| Miller et al, 1998          | 1      | 403    |  | 0.0025 | [0.0001; 0.0137] | 0.3% |
| Parsa et al, 2016           | 50     | 700    |  | 0.0714 | [0.0535; 0.0931] | 0.3% |
| Schreuder et al, 2016       | 25     | 600    |  | 0.0417 | [0.0271; 0.0609] | 0.3% |
| Jahromi et al, 2013         | 26     | 477    |  | 0.0545 | [0.0359; 0.0788] | 0.3% |
| Teoharov et al, 2014        | 67     | 741    |  | 0.0904 | [0.0708; 0.1134] | 0.3% |
| Bortoliero et al, 2006      | 23     | 996    |  | 0.0231 | [0.0147; 0.0344] | 0.3% |
| Grabarczyk et al, 2018      | 1340   | 3079   |  | 0.4352 | [0.4176; 0.4529] | 0.4% |
| Feng et al, 2018            | 1273   | 1912   |  | 0.6658 | [0.6441; 0.6869] | 0.4% |
| Paula et al, 2001           | 10     | 255    |  | 0.0392 | [0.0190; 0.0709] | 0.3% |
| Goncales et al, 2000        | 18     | 357    |  | 0.0504 | [0.0302; 0.0785] | 0.3% |
| Cai et al, 2016             | 1842   | 3337   |  | 0.5520 | [0.5349; 0.5690] | 0.4% |
| Chiu et al, 2013            | 129    | 450    |  | 0.2867 | [0.2453; 0.3309] | 0.3% |
| Chan et al, 2017            | 492    | 1539   |  | 0.3197 | [0.2964; 0.3436] | 0.4% |
| Arif et al, 1994            | 160    | 1418   |  | 0.1128 | [0.0968; 0.1305] | 0.4% |
| Abdelaal et al, 1995        | 100    | 593    |  | 0.1686 | [0.1394; 0.2012] | 0.3% |
| Amarapurkar et al, 2008     | 416    | 1163   |  | 0.3577 | [0.3301; 0.3860] | 0.4% |
| Anita et al, 2014           | 22     | 148    |  | 0.1486 | [0.0956; 0.2164] | 0.3% |
| Grabow et al, 1994          | 16     | 782    |  | 0.0205 | [0.0117; 0.0330] | 0.3% |
| Hardtke et al, 2018         | 91     | 408    |  | 0.2230 | [0.1836; 0.2666] | 0.3% |
| Ataei et al, 2007           | 31     | 816    |  | 0.0380 | [0.0260; 0.0535] | 0.3% |
| Hesamizadeh et al, 2015     | 45     | 514    |  | 0.0875 | [0.0646; 0.1154] | 0.3% |
| Houcine et al, 2012         | 37     | 687    |  | 0.0539 | [0.0382; 0.0735] | 0.3% |
| Jahromi et al, 2013         | 26     | 477    |  | 0.0545 | [0.0359; 0.0788] | 0.3% |
| Sepanlou et al, 2010        | 105    | 1423   |  | 0.0738 | [0.0607; 0.0886] | 0.4% |
| Adesina et al, 2009         | 25     | 186    |  | 0.1344 | [0.0889; 0.1920] | 0.3% |
| Pujol et al, 1994           | 23     | 611    |  | 0.0376 | [0.0240; 0.0559] | 0.3% |
| Raofi et al, 2012           | 31     | 400    |  | 0.0775 | [0.0533; 0.1082] | 0.3% |
| Rahman et al, 2014          | 90     | 300    |  | 0.3000 | [0.2487; 0.3553] | 0.3% |
| Poororawan et al, 1996      | 61     | 1038   |  | 0.0588 | [0.0452; 0.0749] | 0.3% |
| Chen et al, 2012            | 2793   | 14208  |  | 0.1966 | [0.1901; 0.2032] | 0.4% |
| Madden et al, 2016          | 324    | 1161   |  | 0.2791 | [0.2534; 0.3058] | 0.4% |
| Lopes et al, 2017           | 78     | 300    |  | 0.2600 | [0.2113; 0.3135] | 0.3% |
| Kotwal et al, 2014          | 712    | 4175   |  | 0.1705 | [0.1592; 0.1823] | 0.4% |
| Liang et al, 2014           | 129    | 307    |  | 0.4202 | [0.3644; 0.4776] | 0.3% |
| Johargy et al, 2013         | 168    | 900    |  | 0.1867 | [0.1617; 0.2137] | 0.3% |
| Jia et al, 2014             | 3721   | 15862  |  | 0.2346 | [0.2280; 0.2413] | 0.4% |
| Ma et al, 2010              | 407    | 2090   |  | 0.1947 | [0.1780; 0.2124] | 0.4% |
| Li et al, 2011              | 69     | 173    |  | 0.3988 | [0.3253; 0.4759] | 0.3% |
| Konomi et al, 1999          | 93     | 574    |  | 0.1620 | [0.1328; 0.1948] | 0.3% |
| Li et al, 2014              | 197    | 1638   |  | 0.1203 | [0.1049; 0.1370] | 0.4% |
| Katiyar et al, 2018         | 383    | 633    |  | 0.6051 | [0.5658; 0.6434] | 0.3% |
| Intharasongkroh et al, 2019 | 0      | 1019   |  | 0.0000 | [0.0000; 0.0036] | 0.3% |
| Kamel et al, 1995           | 214    | 1259   |  | 0.1700 | [0.1496; 0.1919] | 0.4% |
| Lee et al, 1993             | 43     | 984    |  | 0.0437 | [0.0318; 0.0584] | 0.3% |
| Ibarra et al, 1994          | 82     | 469    |  | 0.1748 | [0.1415; 0.2123] | 0.3% |
| Liu et al, 2019             | 3419   | 10256  |  | 0.3334 | [0.3242; 0.3426] | 0.4% |
| Khounvisith et al, 2018     | 38     | 210    |  | 0.1810 | [0.1313; 0.2398] | 0.3% |



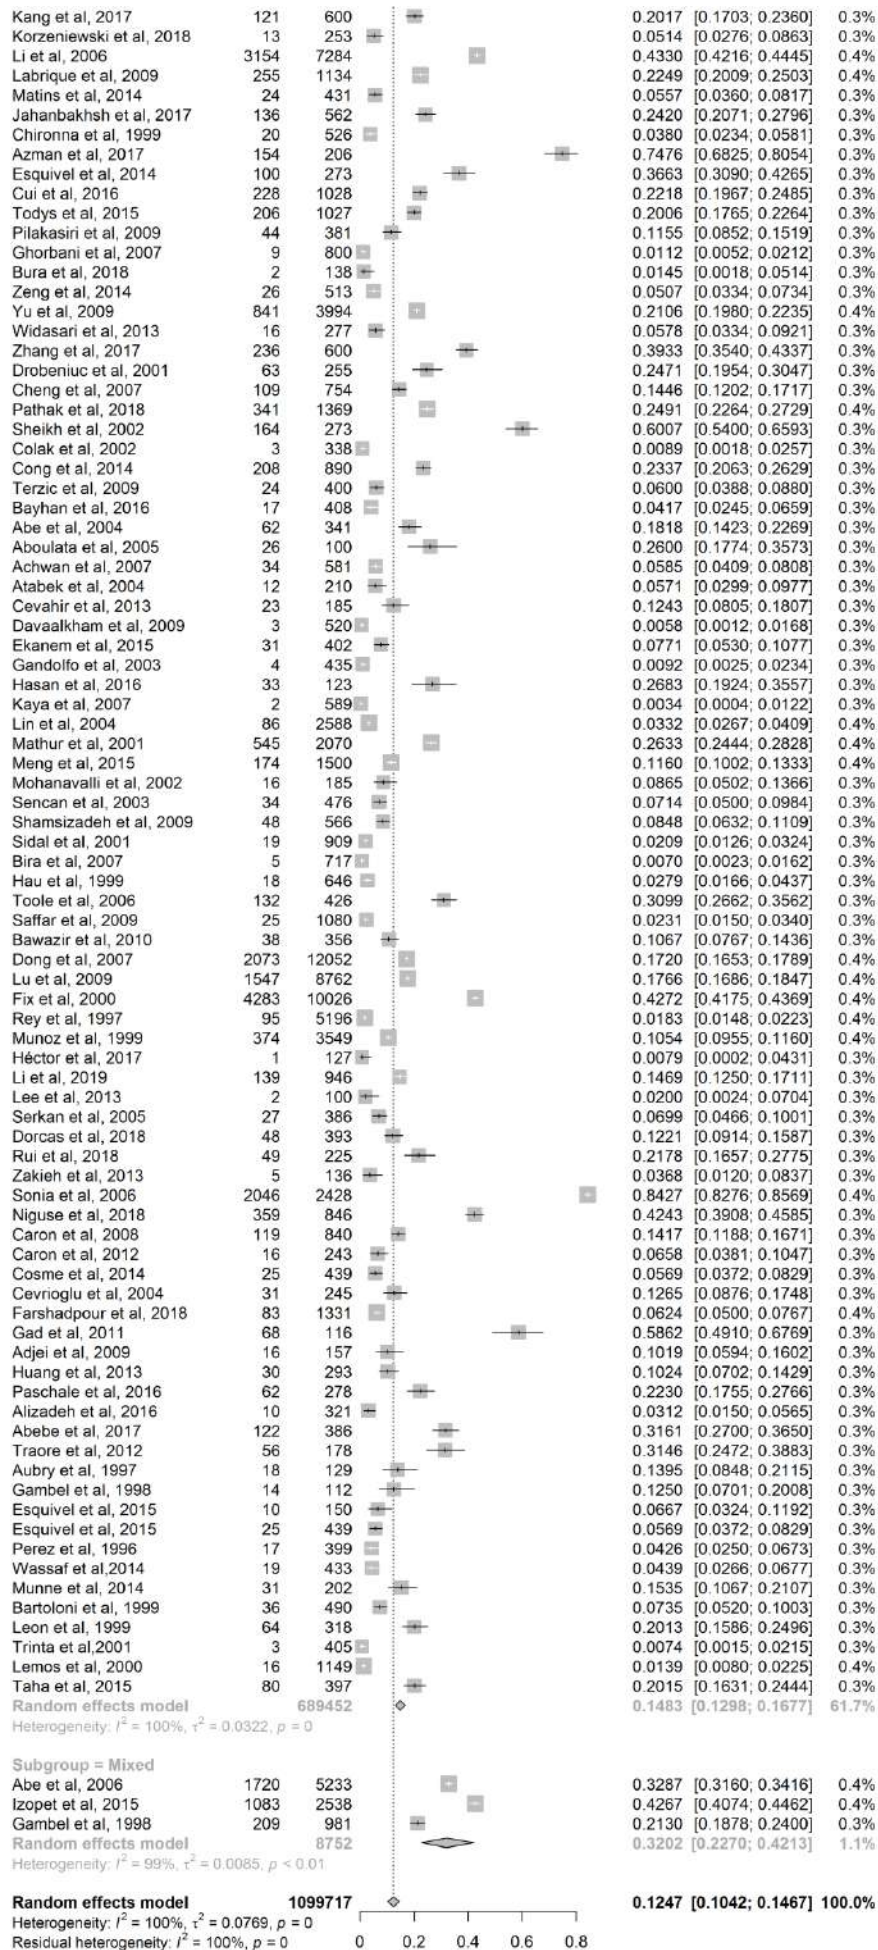



**Figure S12. Forest plot of estimated pooled anti-HEV IgG seroprevalence among general population based on time period of 1993-2006 and 2007-2019.**

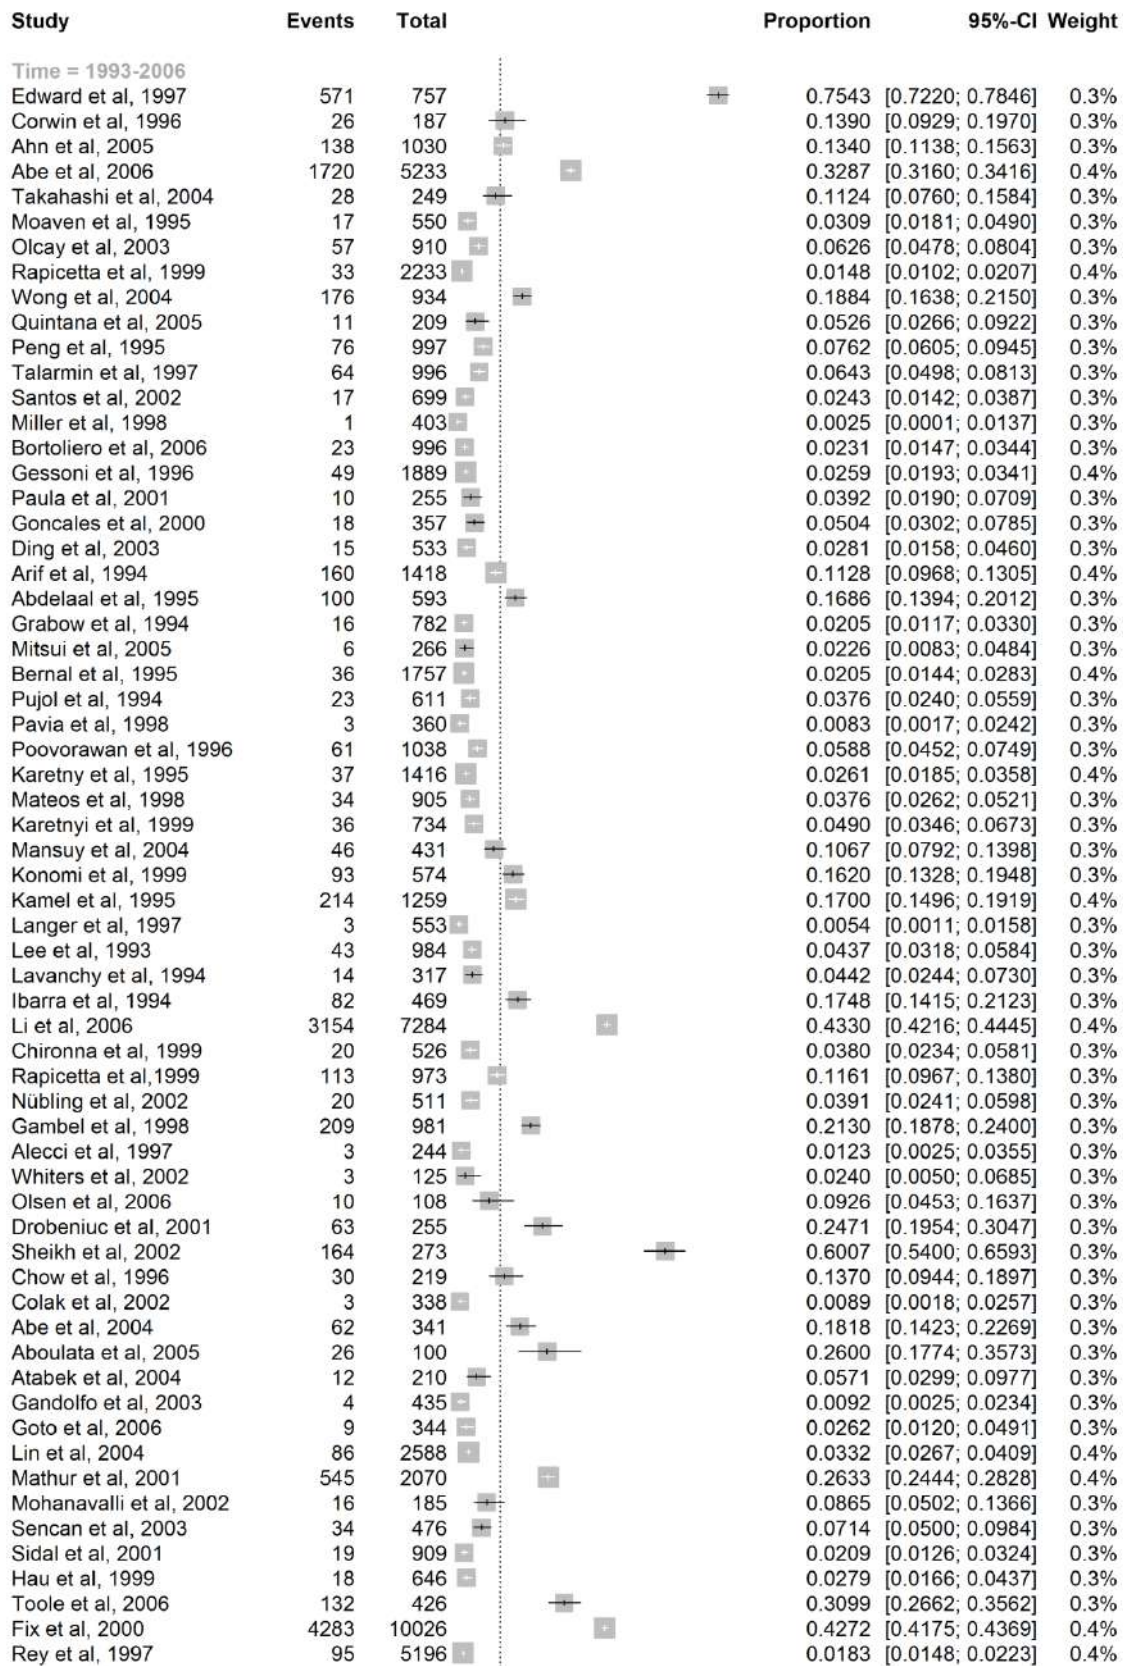

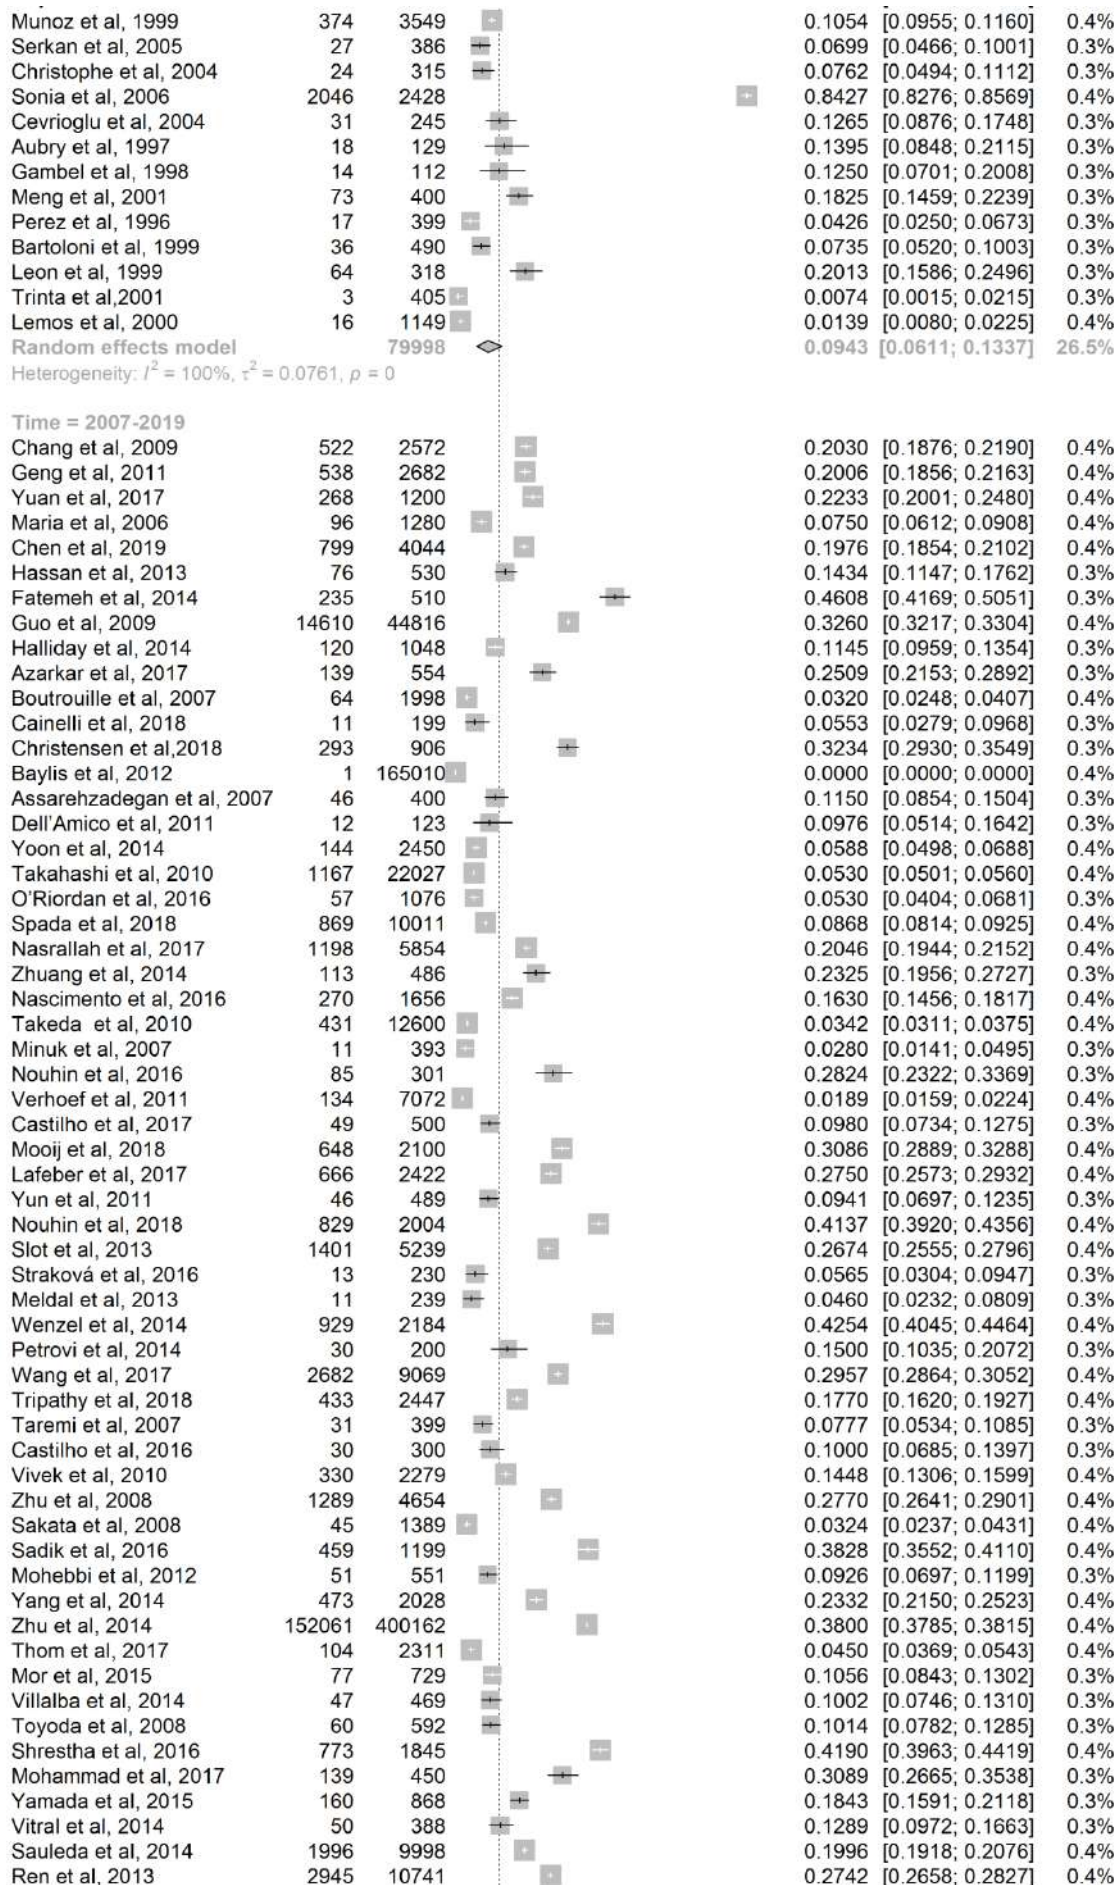



|                             |      |       |  |        |                  |      |
|-----------------------------|------|-------|--|--------|------------------|------|
| Parsa et al, 2016           | 50   | 700   |  | 0.0714 | [0.0535; 0.0931] | 0.3% |
| Pittaras et al, 2014        | 25   | 265   |  | 0.0943 | [0.0620; 0.1361] | 0.3% |
| Schreuder et al, 2016       | 25   | 600   |  | 0.0417 | [0.0271; 0.0609] | 0.3% |
| Jahromi et al, 2013         | 26   | 477   |  | 0.0545 | [0.0359; 0.0788] | 0.3% |
| Niederhauser et al, 2017    | 737  | 3609  |  | 0.2042 | [0.1912; 0.2177] | 0.4% |
| Teoharov et al, 2014        | 67   | 741   |  | 0.0904 | [0.0708; 0.1134] | 0.3% |
| Hewitt et al, 2018          | 98   | 1013  |  | 0.0967 | [0.0792; 0.1166] | 0.3% |
| Alberts et al, 2018         | 190  | 7065  |  | 0.0269 | [0.0232; 0.0309] | 0.4% |
| Grabarczyk et al, 2018      | 1340 | 3079  |  | 0.4352 | [0.4176; 0.4529] | 0.4% |
| Fukuda et al, 2007          | 168  | 3185  |  | 0.0527 | [0.0452; 0.0611] | 0.4% |
| Fogeda et al, 2012          | 25   | 2305  |  | 0.0108 | [0.0070; 0.0160] | 0.4% |
| Fischer et al, 2014         | 163  | 1203  |  | 0.1355 | [0.1166; 0.1561] | 0.4% |
| Feng et al, 2018            | 1273 | 1912  |  | 0.6658 | [0.6441; 0.6869] | 0.4% |
| Fearon et al, 2017          | 241  | 4102  |  | 0.0588 | [0.0517; 0.0664] | 0.4% |
| Harvala et al, 2018         | 42   | 480   |  | 0.0875 | [0.0638; 0.1164] | 0.3% |
| Cleland et al, 2013         | 73   | 1559  |  | 0.0468 | [0.0369; 0.0585] | 0.4% |
| Cangin et al, 2018          | 377  | 7656  |  | 0.0492 | [0.0445; 0.0543] | 0.4% |
| Ditah et al, 2014           | 490  | 8814  |  | 0.0556 | [0.0509; 0.0606] | 0.4% |
| Cai et al, 2016             | 1842 | 3337  |  | 0.5520 | [0.5349; 0.5690] | 0.4% |
| Chiu et al, 2013            | 129  | 450   |  | 0.2867 | [0.2453; 0.3309] | 0.3% |
| Dimeglio et al, 2018        | 23   | 300   |  | 0.0767 | [0.0492; 0.1128] | 0.3% |
| Chan et al, 2017            | 492  | 1539  |  | 0.3197 | [0.2964; 0.3436] | 0.4% |
| Amarapurkar et al, 2008     | 416  | 1163  |  | 0.3577 | [0.3301; 0.3860] | 0.4% |
| Anita et al, 2014           | 22   | 148   |  | 0.1486 | [0.0956; 0.2164] | 0.3% |
| Hardtke et al, 2018         | 91   | 408   |  | 0.2230 | [0.1836; 0.2666] | 0.3% |
| Ataei et al, 2007           | 31   | 816   |  | 0.0380 | [0.0260; 0.0535] | 0.3% |
| Hesamizadeh et al, 2015     | 45   | 514   |  | 0.0875 | [0.0646; 0.1154] | 0.3% |
| Hogema et al, 2016          | 11   | 45    |  | 0.2444 | [0.1288; 0.3954] | 0.3% |
| Hickey et al, 2016          | 16   | 198   |  | 0.0808 | [0.0469; 0.1279] | 0.3% |
| Houcine et al, 2012         | 37   | 687   |  | 0.0539 | [0.0382; 0.0735] | 0.3% |
| Jahromi et al, 2013         | 26   | 477   |  | 0.0545 | [0.0359; 0.0788] | 0.3% |
| Sepanlou et al, 2010        | 105  | 1423  |  | 0.0738 | [0.0607; 0.0886] | 0.4% |
| Adesina et al, 2009         | 25   | 186   |  | 0.1344 | [0.0889; 0.1920] | 0.3% |
| Ricco et al, 2016           | 9    | 199   |  | 0.0452 | [0.0209; 0.0841] | 0.3% |
| Puttini et al, 2015         | 12   | 132   |  | 0.0909 | [0.0479; 0.1534] | 0.3% |
| Zuin et al, 2016            | 380  | 3546  |  | 0.1072 | [0.0972; 0.1178] | 0.4% |
| Scottto et al, 2012         | 2    | 151   |  | 0.0132 | [0.0016; 0.0470] | 0.3% |
| Raooofi et al, 2012         | 31   | 400   |  | 0.0775 | [0.0533; 0.1082] | 0.3% |
| Rahman et al, 2014          | 90   | 300   |  | 0.3000 | [0.2487; 0.3553] | 0.3% |
| Sabato et al, 2017          | 4    | 253   |  | 0.0158 | [0.0043; 0.0400] | 0.3% |
| Chen et al, 2012            | 2793 | 14208 |  | 0.1966 | [0.1901; 0.2032] | 0.4% |
| Madden et al, 2016          | 324  | 1161  |  | 0.2791 | [0.2534; 0.3058] | 0.4% |
| Love et al, 2018            | 6    | 291   |  | 0.0206 | [0.0076; 0.0443] | 0.3% |
| Lopes et al, 2017           | 78   | 300   |  | 0.2600 | [0.2113; 0.3135] | 0.3% |
| Mansuy et al, 2016          | 2371 | 10569 |  | 0.2243 | [0.2164; 0.2324] | 0.4% |
| Lucarelli et al, 2016       | 153  | 313   |  | 0.4888 | [0.4322; 0.5457] | 0.3% |
| Lange et al, 2016           | 177  | 1263  |  | 0.1401 | [0.1215; 0.1605] | 0.4% |
| Kotwal et al, 2014          | 712  | 4175  |  | 0.1705 | [0.1592; 0.1823] | 0.4% |
| Liang et al, 2014           | 129  | 307   |  | 0.4202 | [0.3644; 0.4776] | 0.3% |
| Marcantonio et al, 2018     | 10   | 198   |  | 0.0505 | [0.0245; 0.0909] | 0.3% |
| Lanini et al, 2015          | 60   | 1116  |  | 0.0538 | [0.0413; 0.0687] | 0.4% |
| Johargy et al, 2013         | 168  | 900   |  | 0.1867 | [0.1617; 0.2137] | 0.3% |
| Jia et al, 2014             | 3721 | 15862 |  | 0.2346 | [0.2280; 0.2413] | 0.4% |
| Ma et al, 2010              | 407  | 2090  |  | 0.1947 | [0.1780; 0.2124] | 0.4% |
| Kaufmann et al, 2011        | 27   | 550   |  | 0.0491 | [0.0326; 0.0706] | 0.3% |
| Mansuy et al, 2015          | 1310 | 3353  |  | 0.3907 | [0.3741; 0.4074] | 0.4% |
| Izopet et al, 2015          | 1083 | 2538  |  | 0.4267 | [0.4074; 0.4462] | 0.4% |
| Li et al, 2011              | 69   | 173   |  | 0.3988 | [0.3253; 0.4759] | 0.3% |
| Li et al, 2014              | 197  | 1638  |  | 0.1203 | [0.1049; 0.1370] | 0.4% |
| Juhl et al, 2017            | 70   | 449   |  | 0.1559 | [0.1236; 0.1928] | 0.3% |
| Katiyar et al, 2018         | 383  | 633   |  | 0.6051 | [0.5658; 0.6434] | 0.3% |
| Intharasongkroh et al, 2019 | 0    | 1019  |  | 0.0000 | [0.0000; 0.0036] | 0.3% |
| Juhl et al, 2014            | 69   | 1019  |  | 0.0677 | [0.0531; 0.0849] | 0.3% |
| Nagler et al, 2014          | 143  | 997   |  | 0.1434 | [0.1222; 0.1667] | 0.3% |
| Liu et al, 2019             | 3419 | 10256 |  | 0.3334 | [0.3242; 0.3426] | 0.4% |
| Mahrt et al, 2018           | 679  | 3000  |  | 0.2263 | [0.2115; 0.2417] | 0.4% |
| Kuniholm et al, 2009        | 3916 | 18695 |  | 0.2095 | [0.2037; 0.2154] | 0.4% |
| Krumbholz et al, 2011       | 18   | 116   |  | 0.1552 | [0.0946; 0.2341] | 0.3% |
| Khounvisith et al, 2018     | 38   | 210   |  | 0.1810 | [0.1313; 0.2398] | 0.3% |



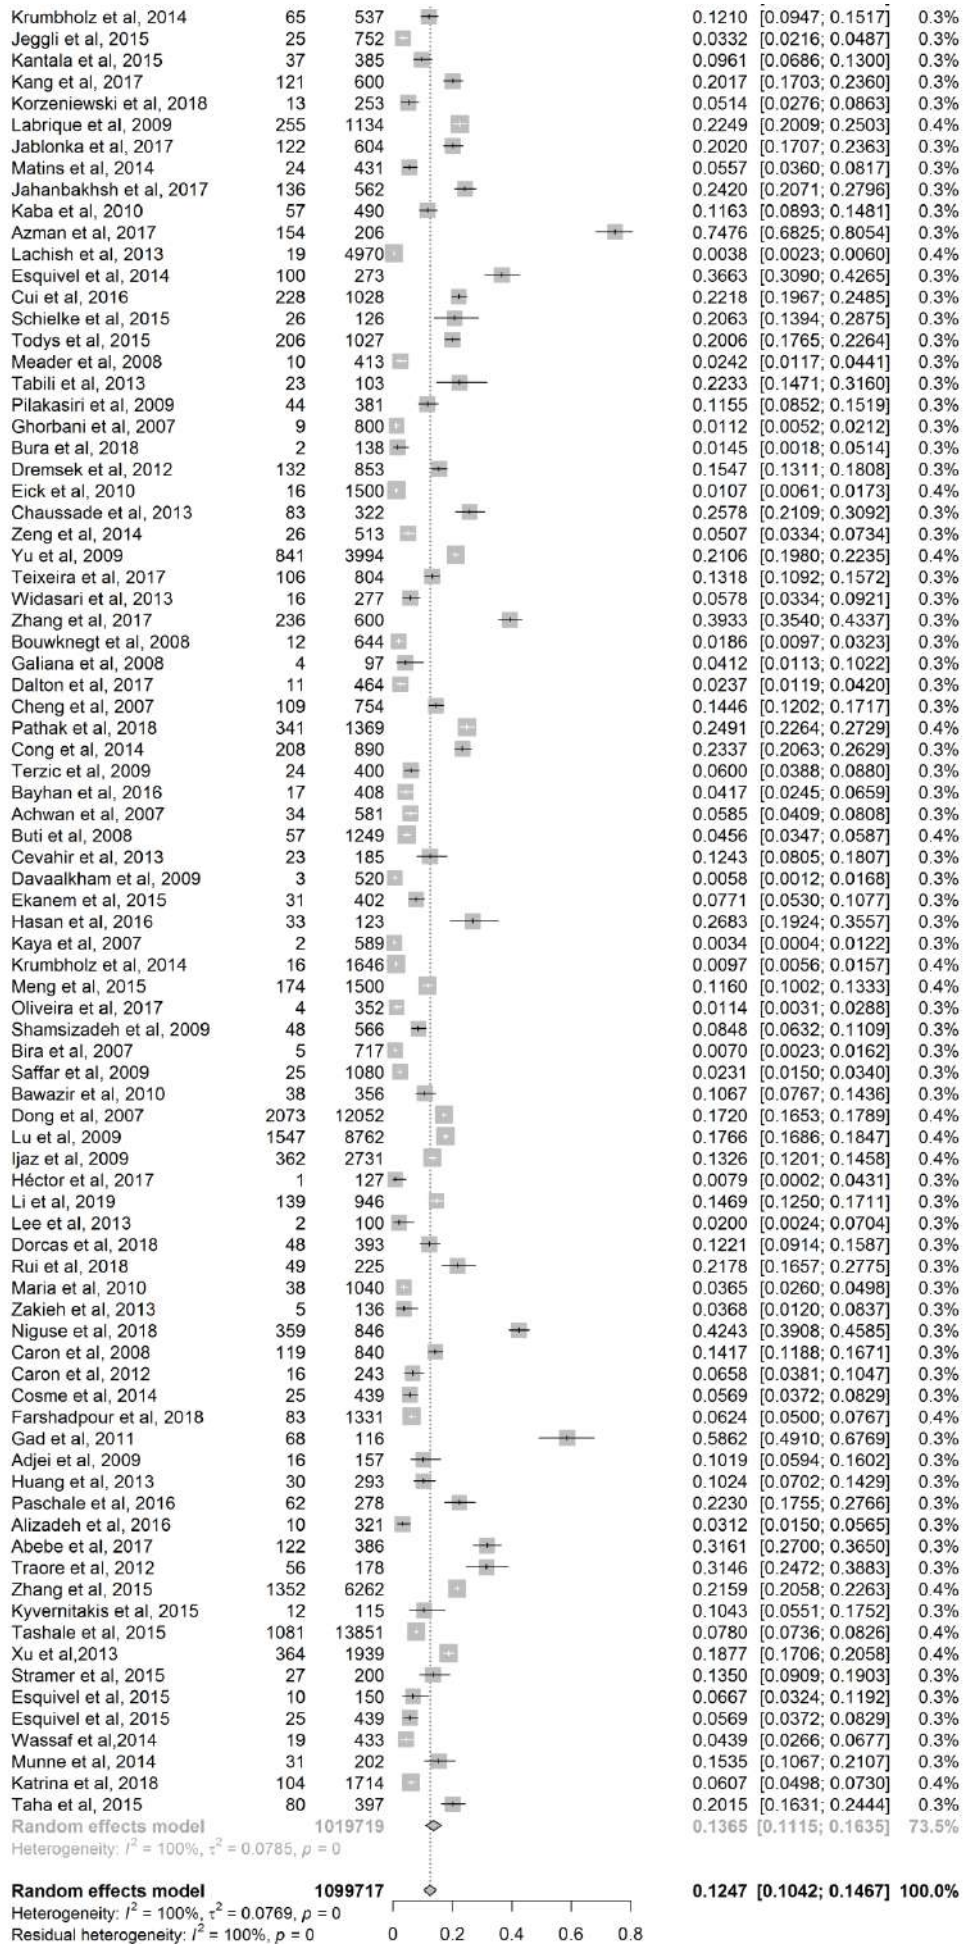

**Figure S13. Forest plot of estimated pooled anti-HEV IgG seroprevalence among swine-related occupational population based on different countries.**

Note: country named multiple means people in the study are from more than one country.

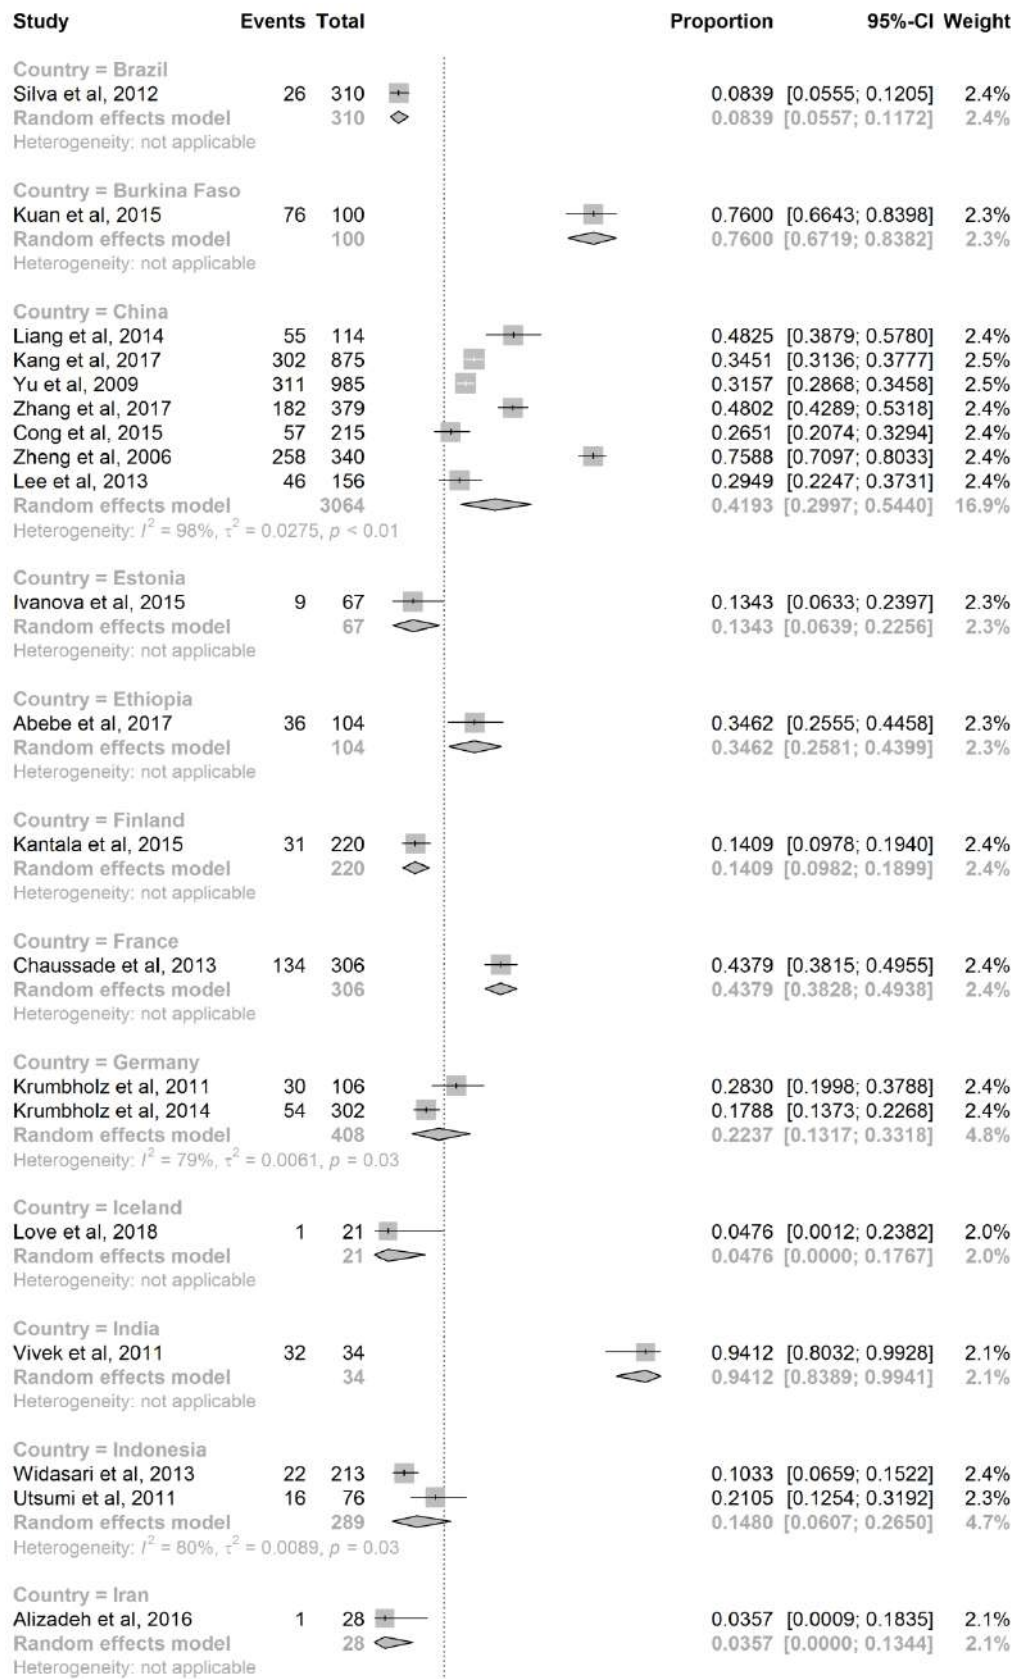

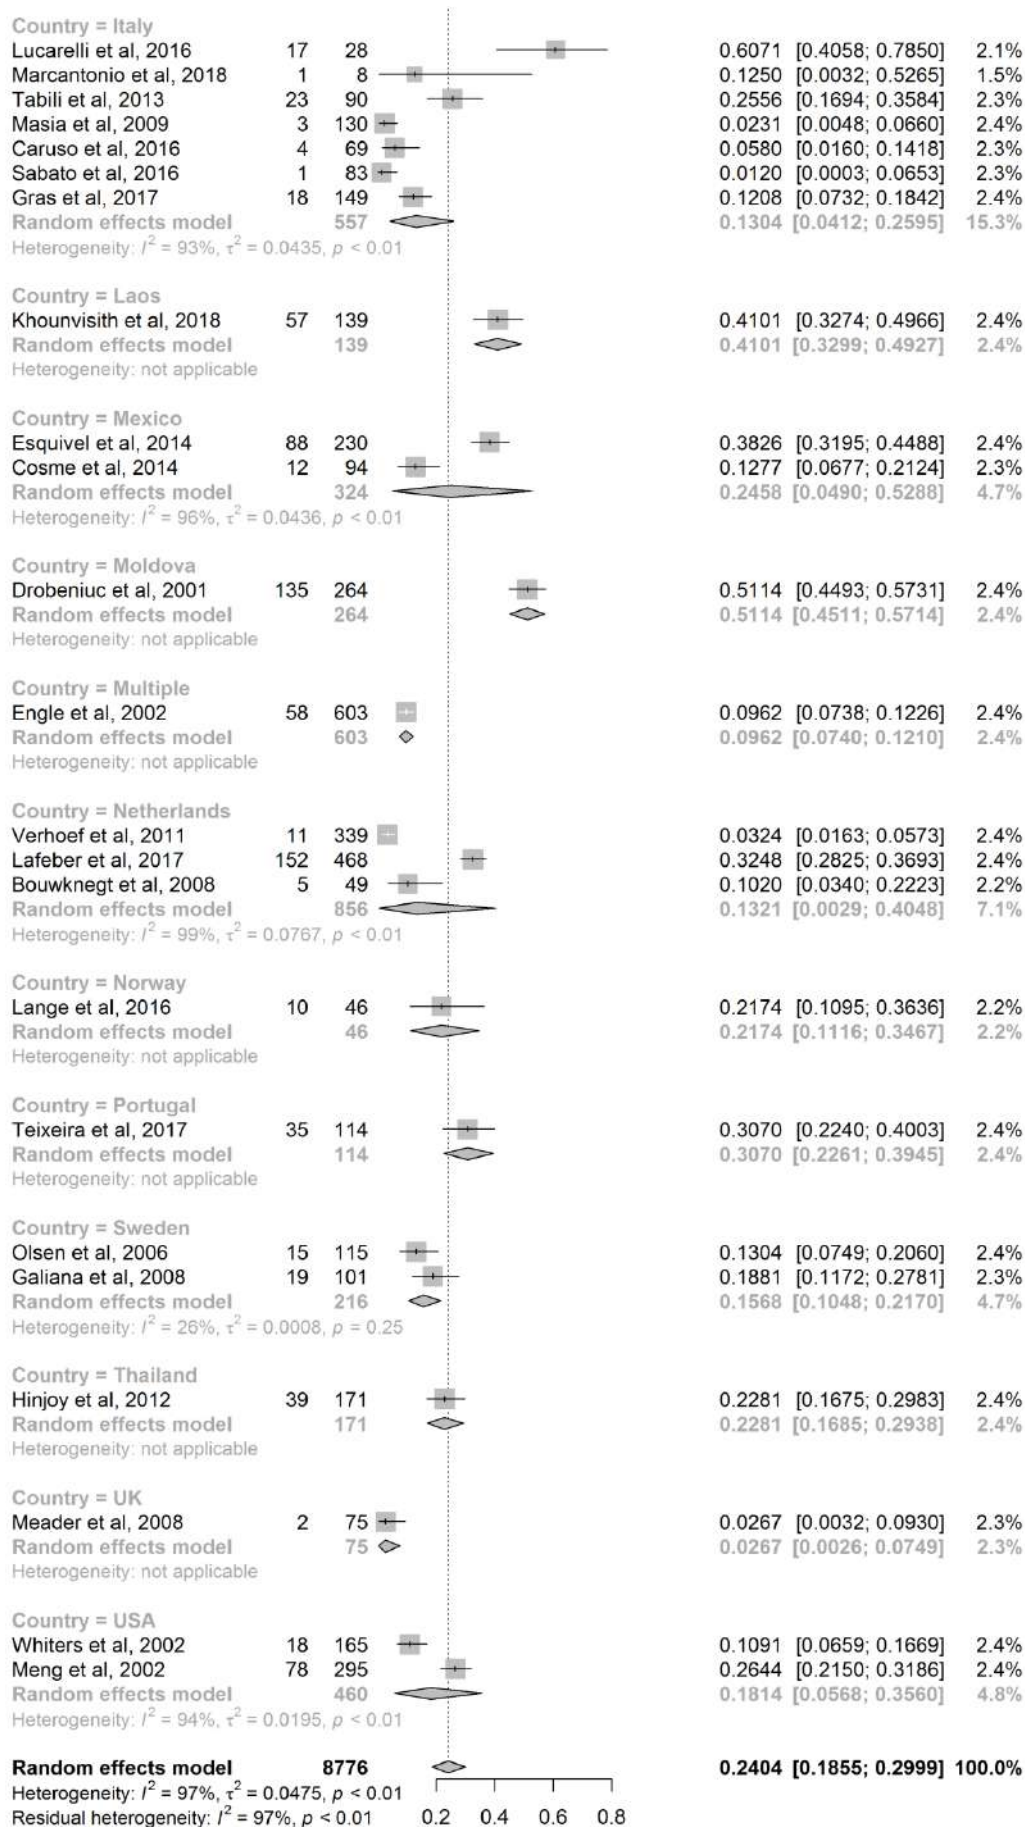



Figure S14. Forest plot of estimated pooled anti-HEV IgG seroprevalence among special population.

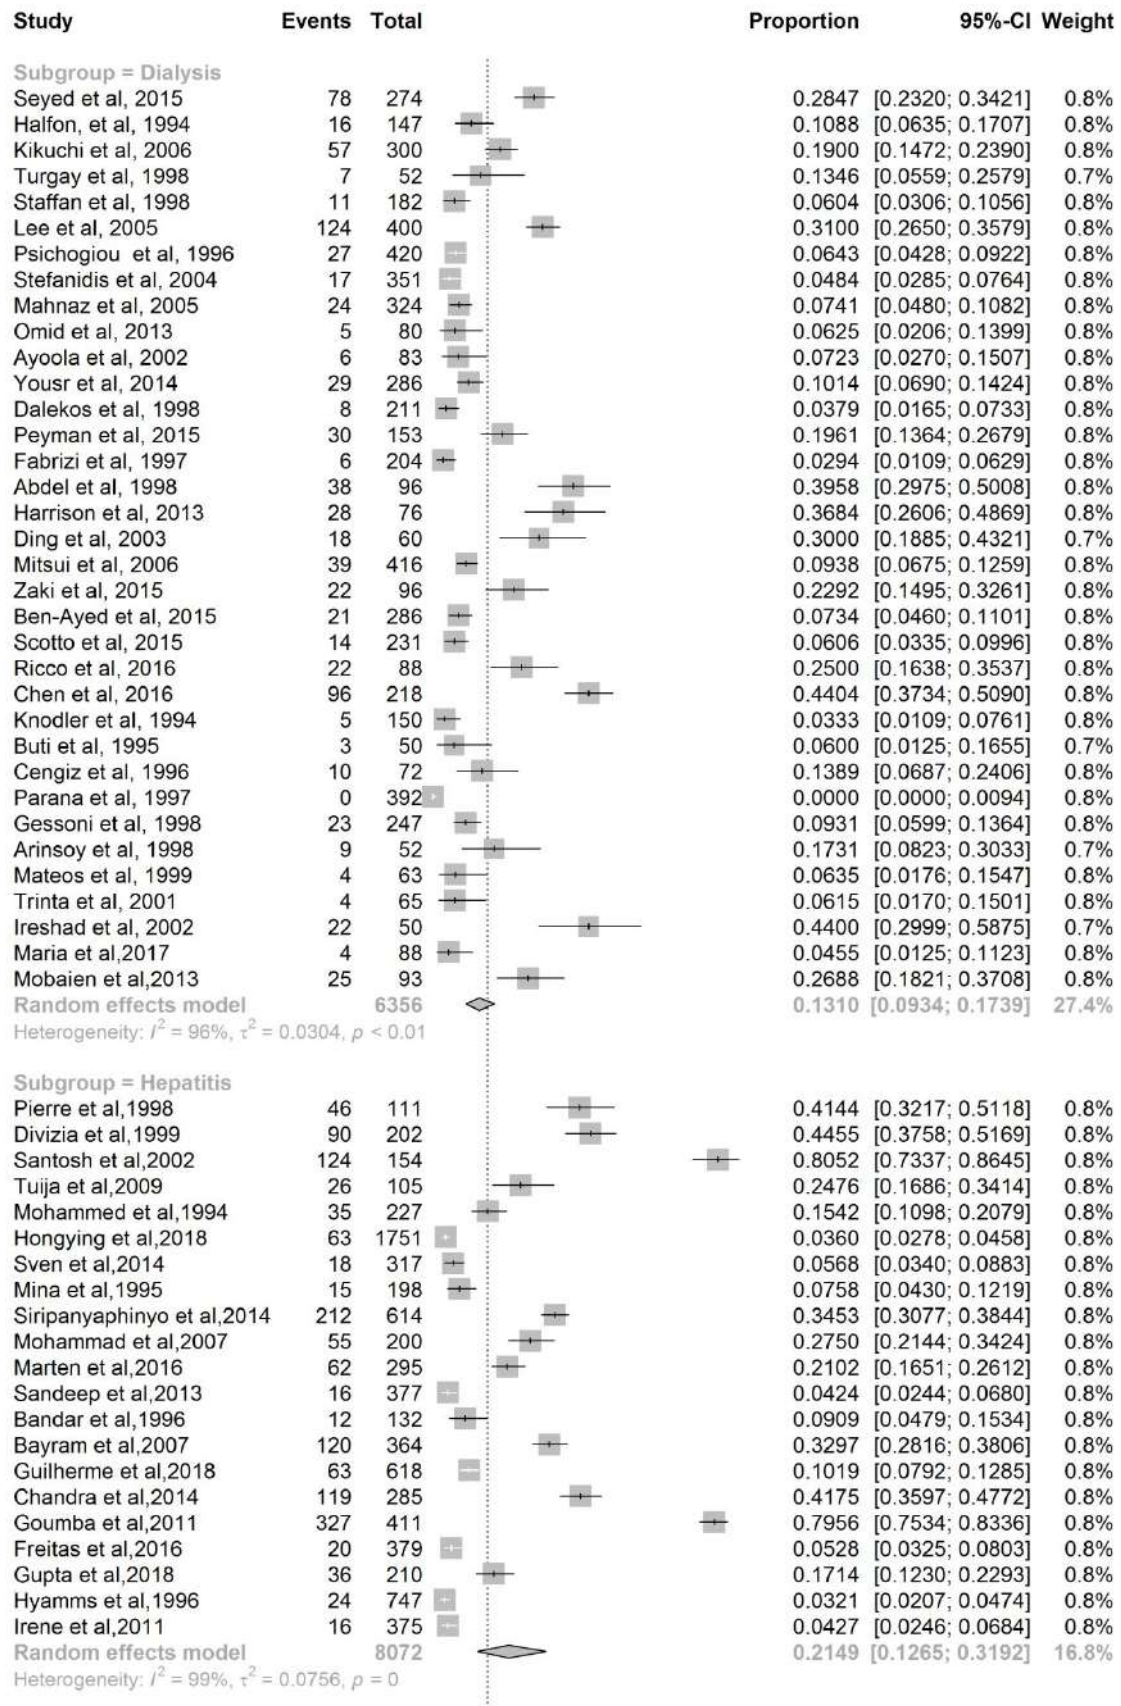

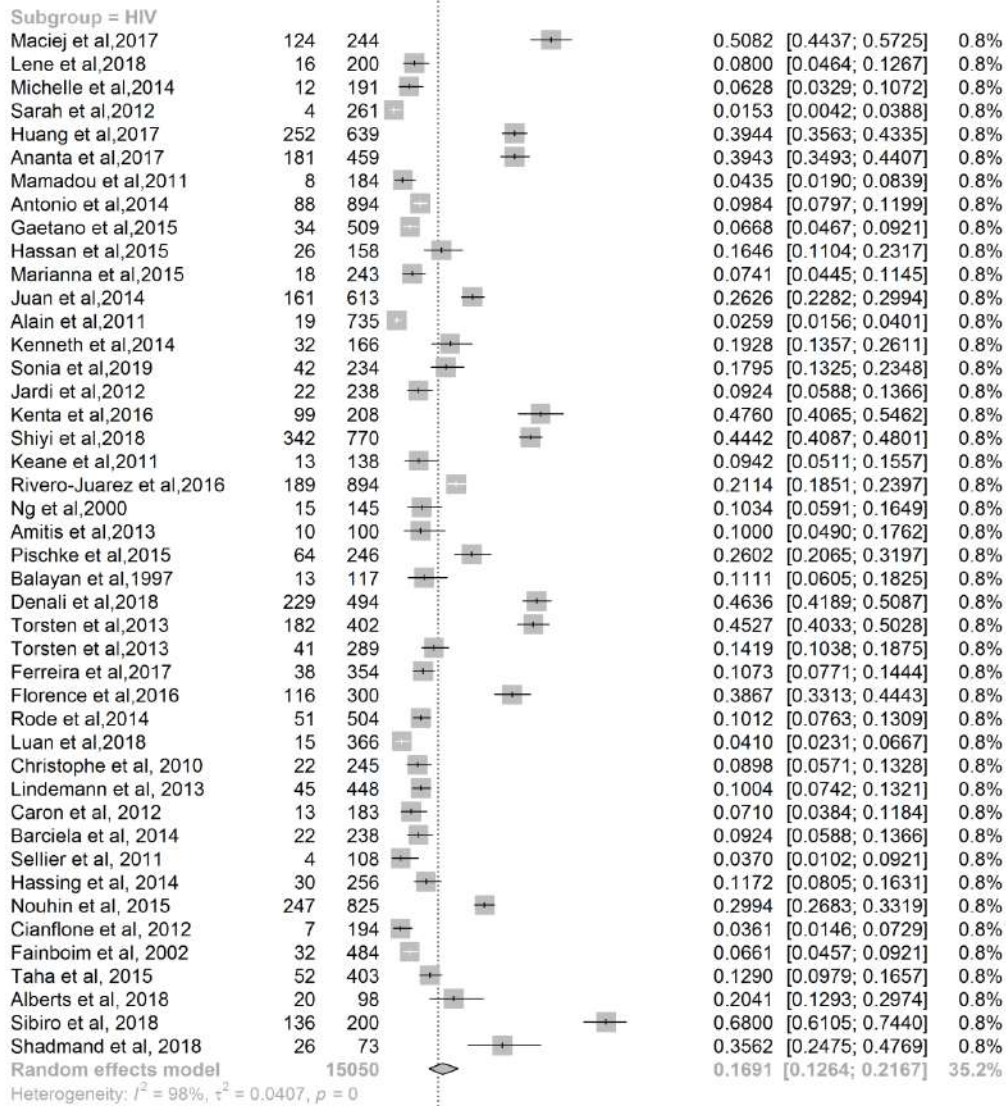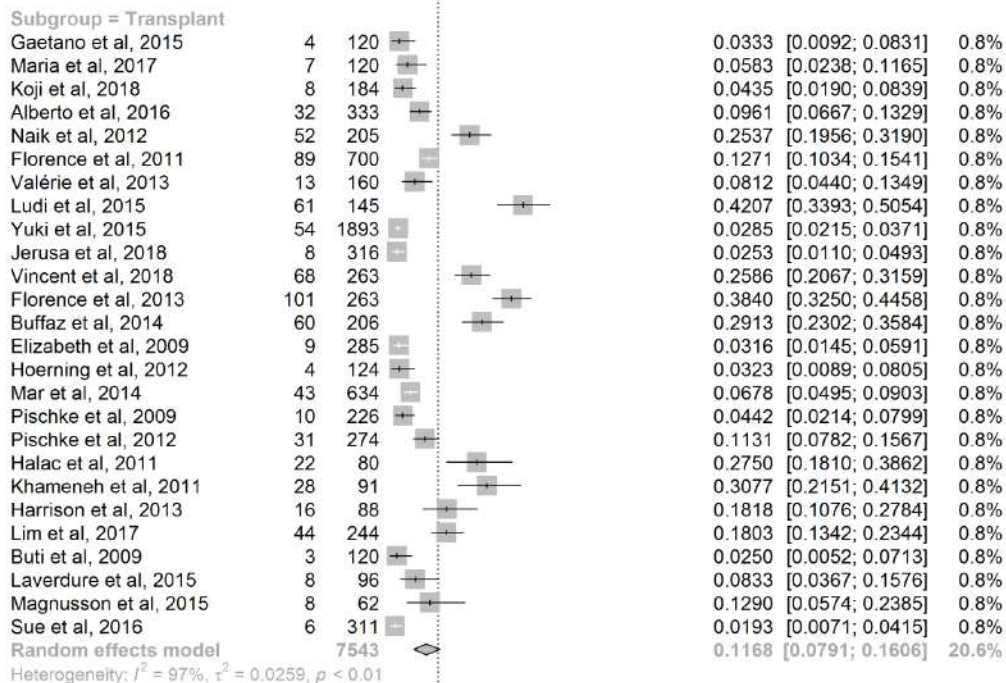

**Random effects model** 37021  
 Heterogeneity:  $I^2 = 98\%$ ,  $\tau^2 = 0.0448$ ,  $p = 0$   
 Residual heterogeneity:  $I^2 = 98\%$ ,  $p = 0$  0.1543 [0.1282; 0.1824] 100.0%



Figure S15. Forest plot of estimated pooled anti-HEV IgM seroprevalence among special population.

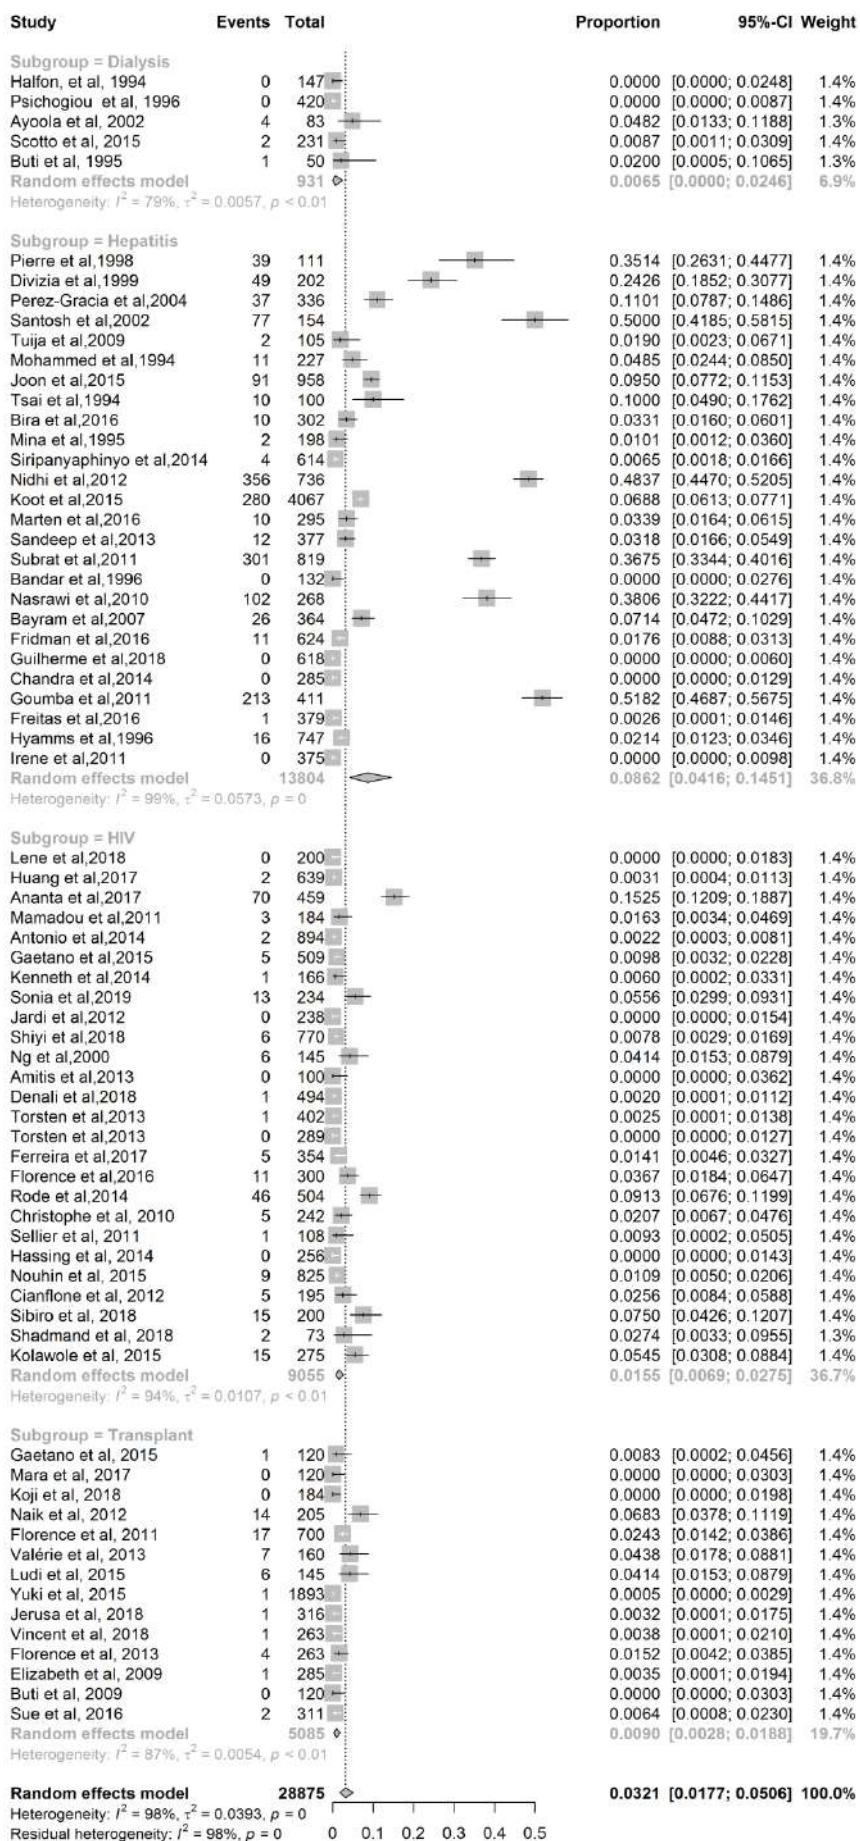



Figure S16. Forest plot of estimated pooled HEV RNA positive rate among special population.

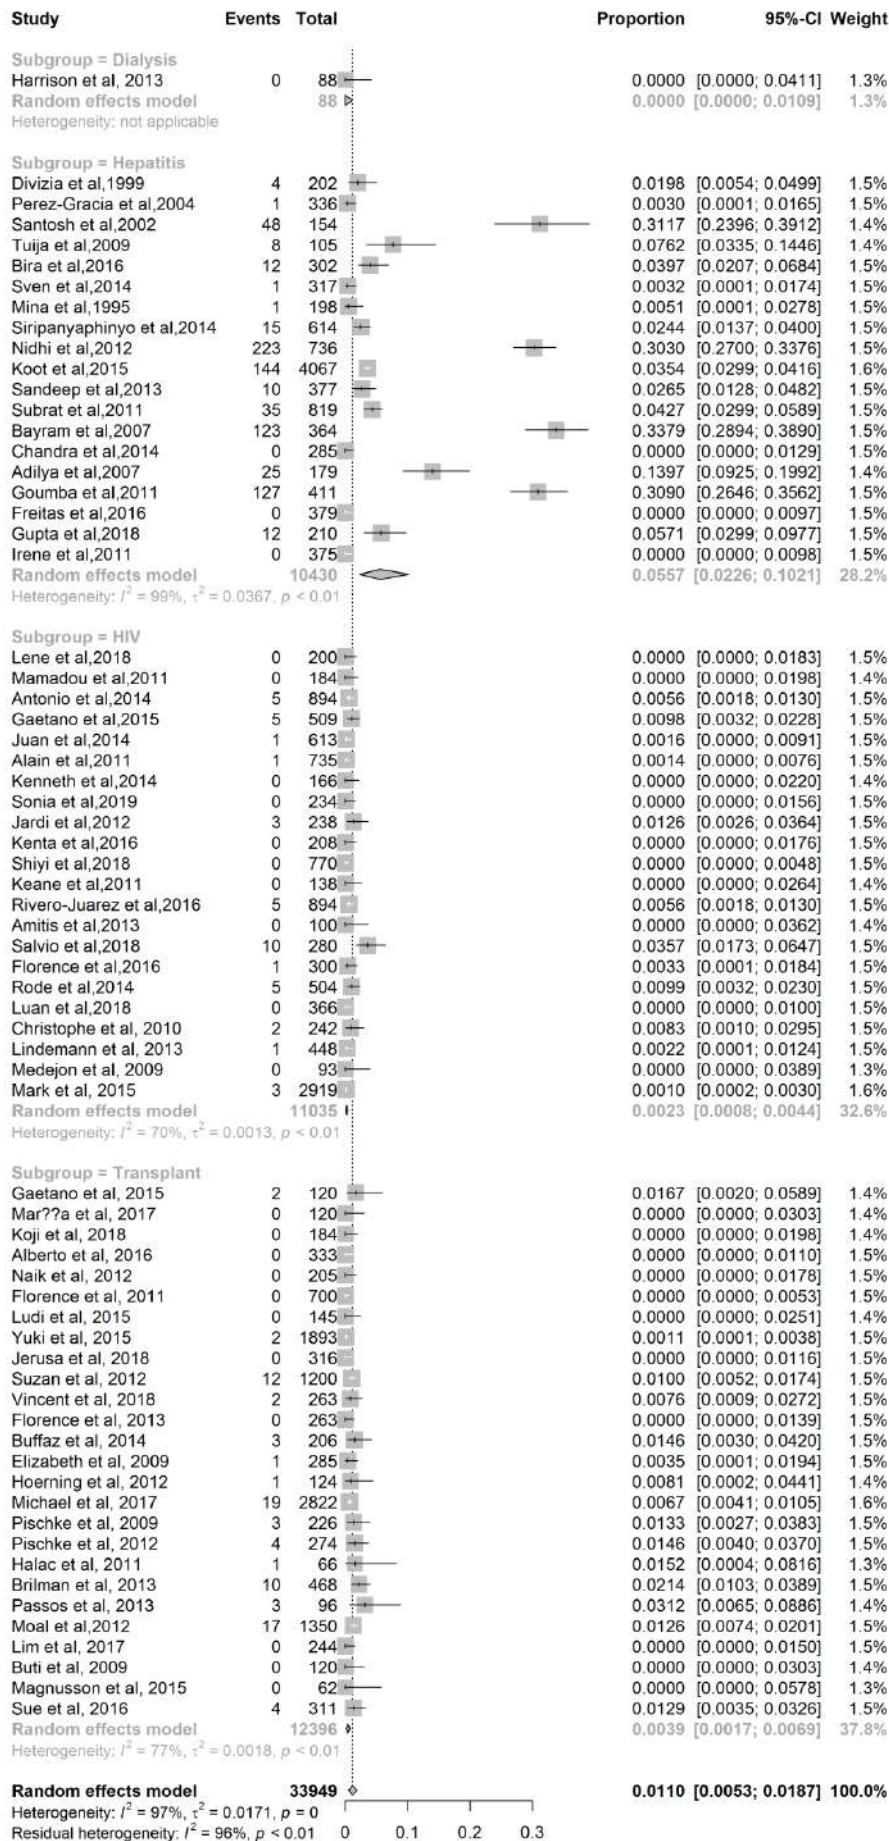

Figure S17. Forest plot of estimated pooled seroprevalence of anti-HEV IgG among hepatitis population.

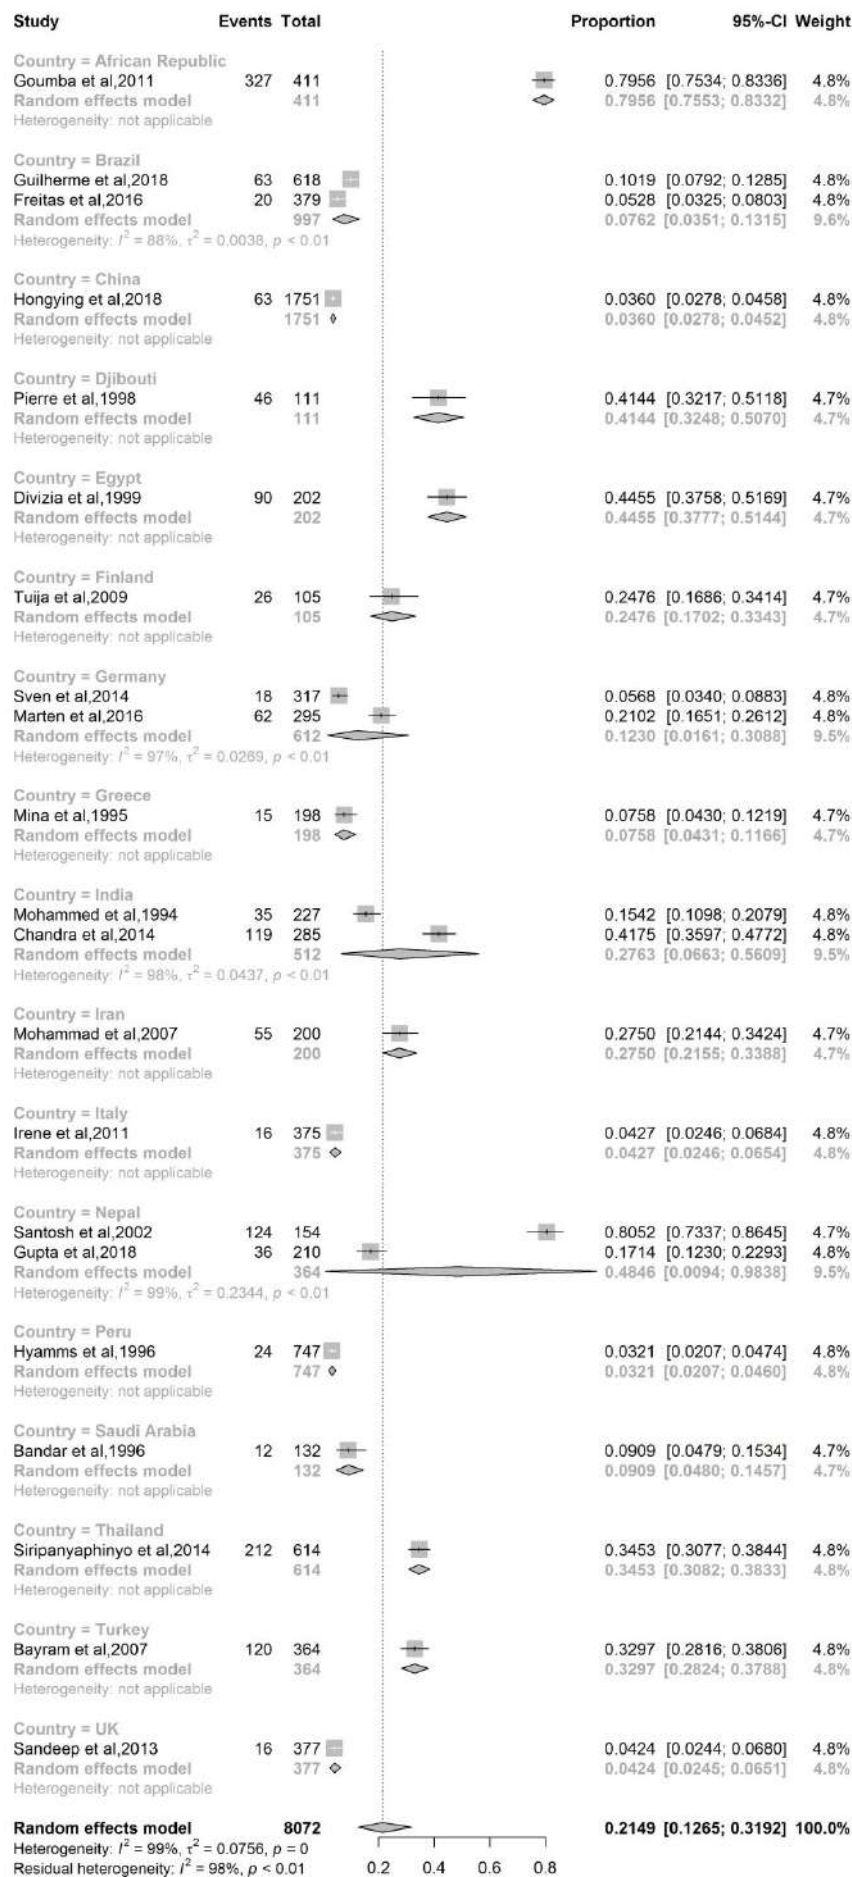

**Figure S18. Forest plot of estimated pooled seroprevalence of anti-HEV IgM among hepatitis population.**

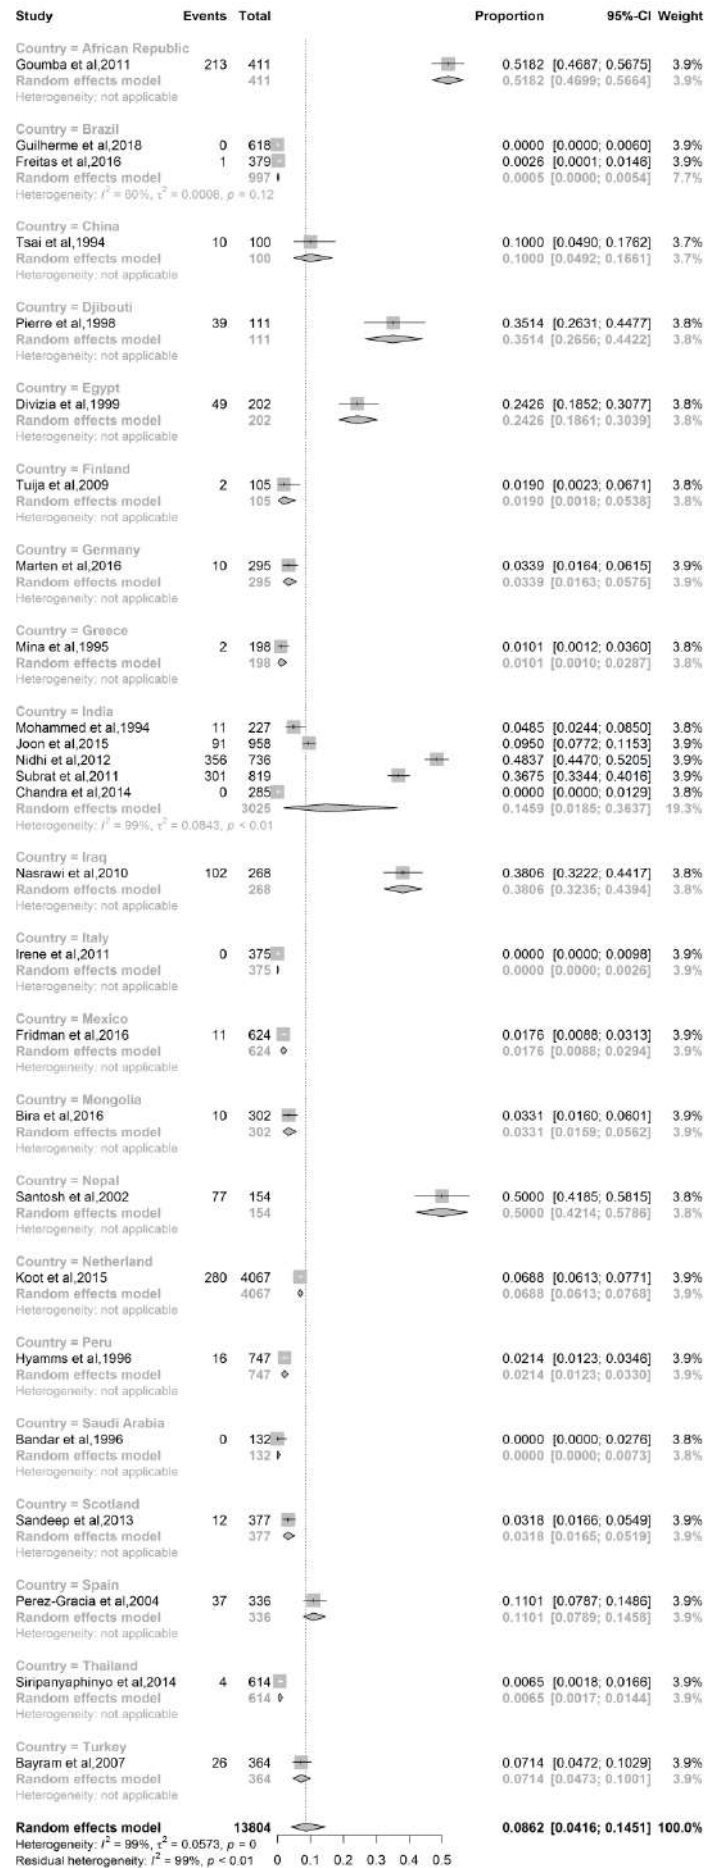



Figure S19. Forest plot of estimated pooled HEV RNA positive rate among hepatitis population.

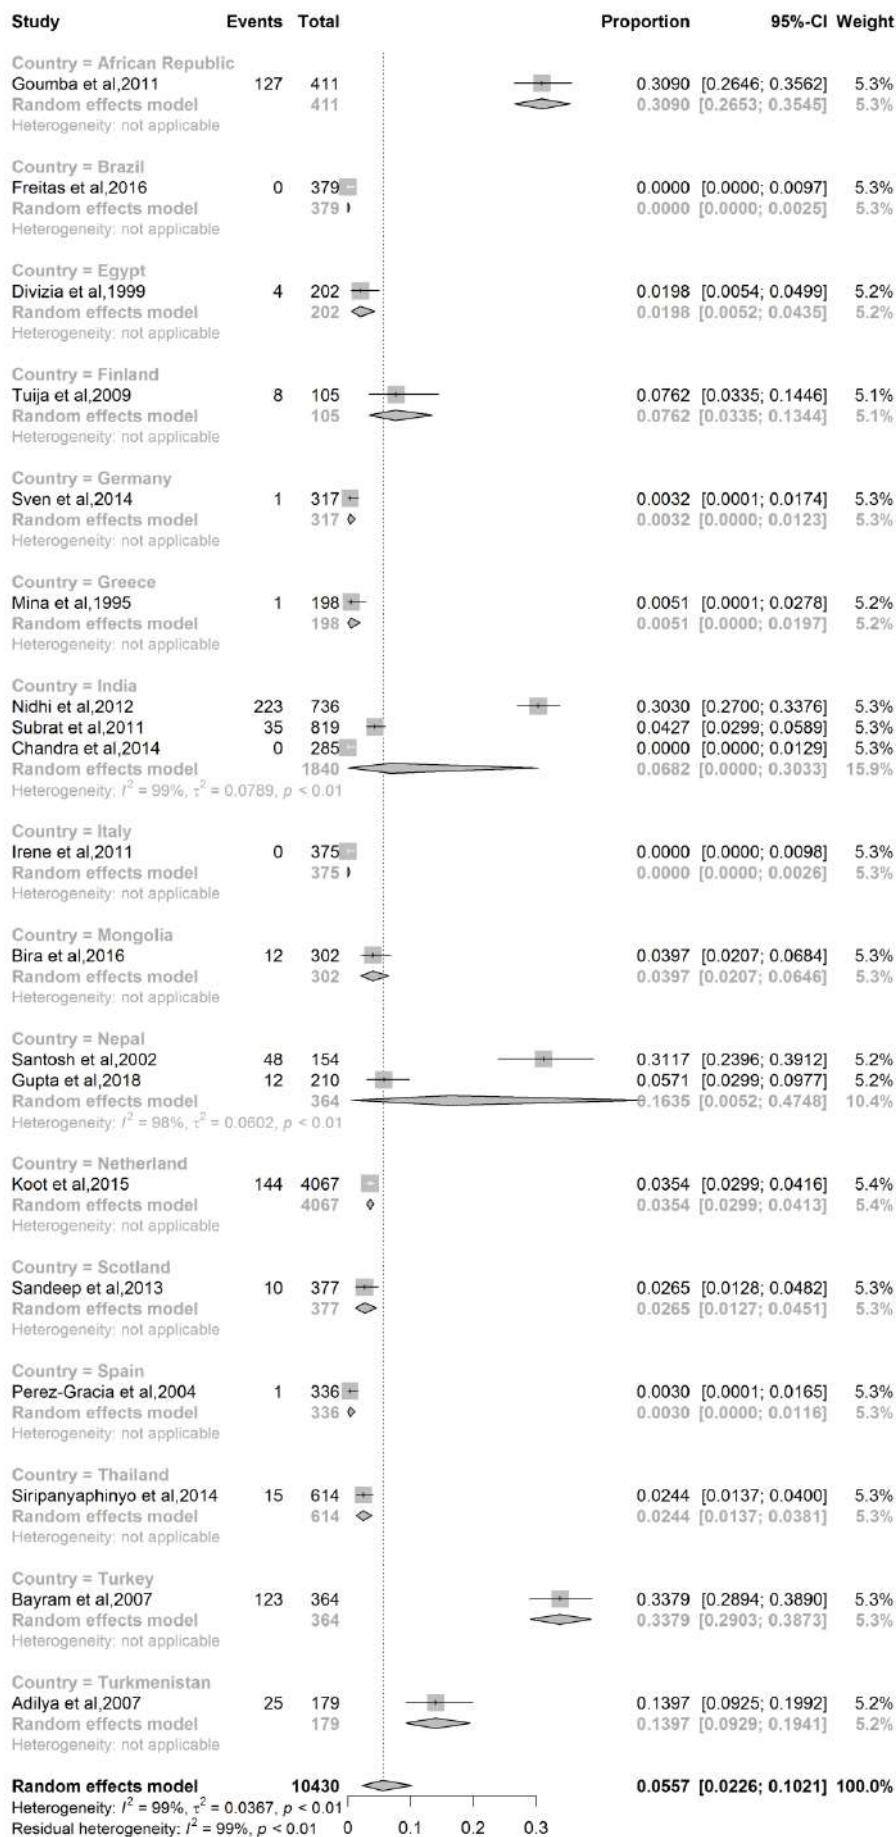

**Figure S20. Forest plot of estimated pooled seroprevalence of anti-HEV IgG among HIV population based on different countries.**

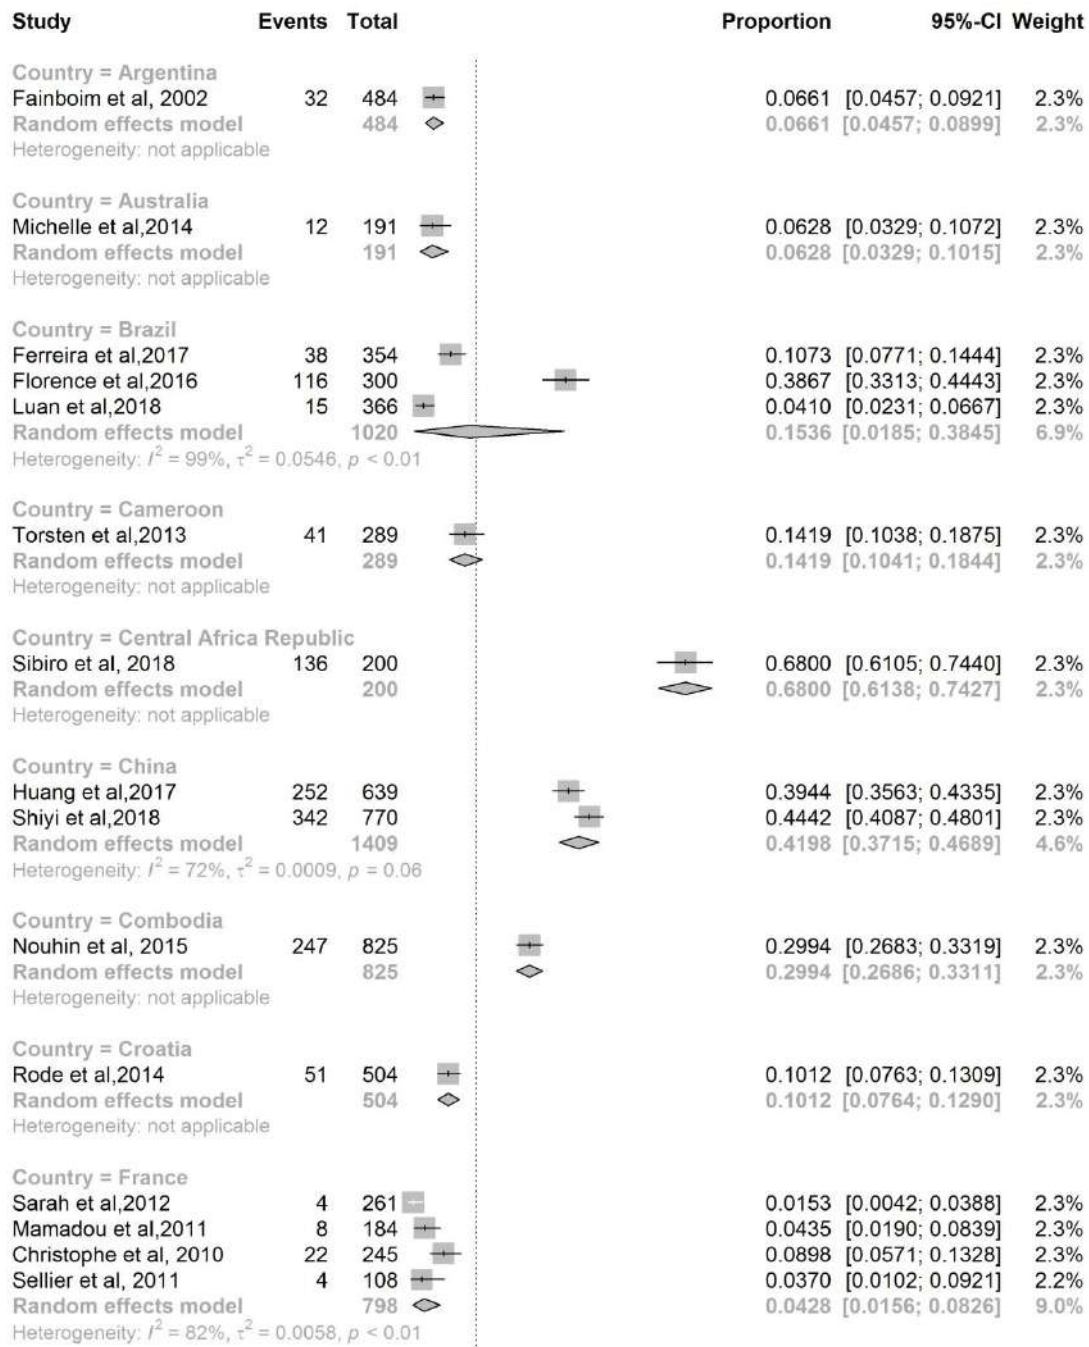

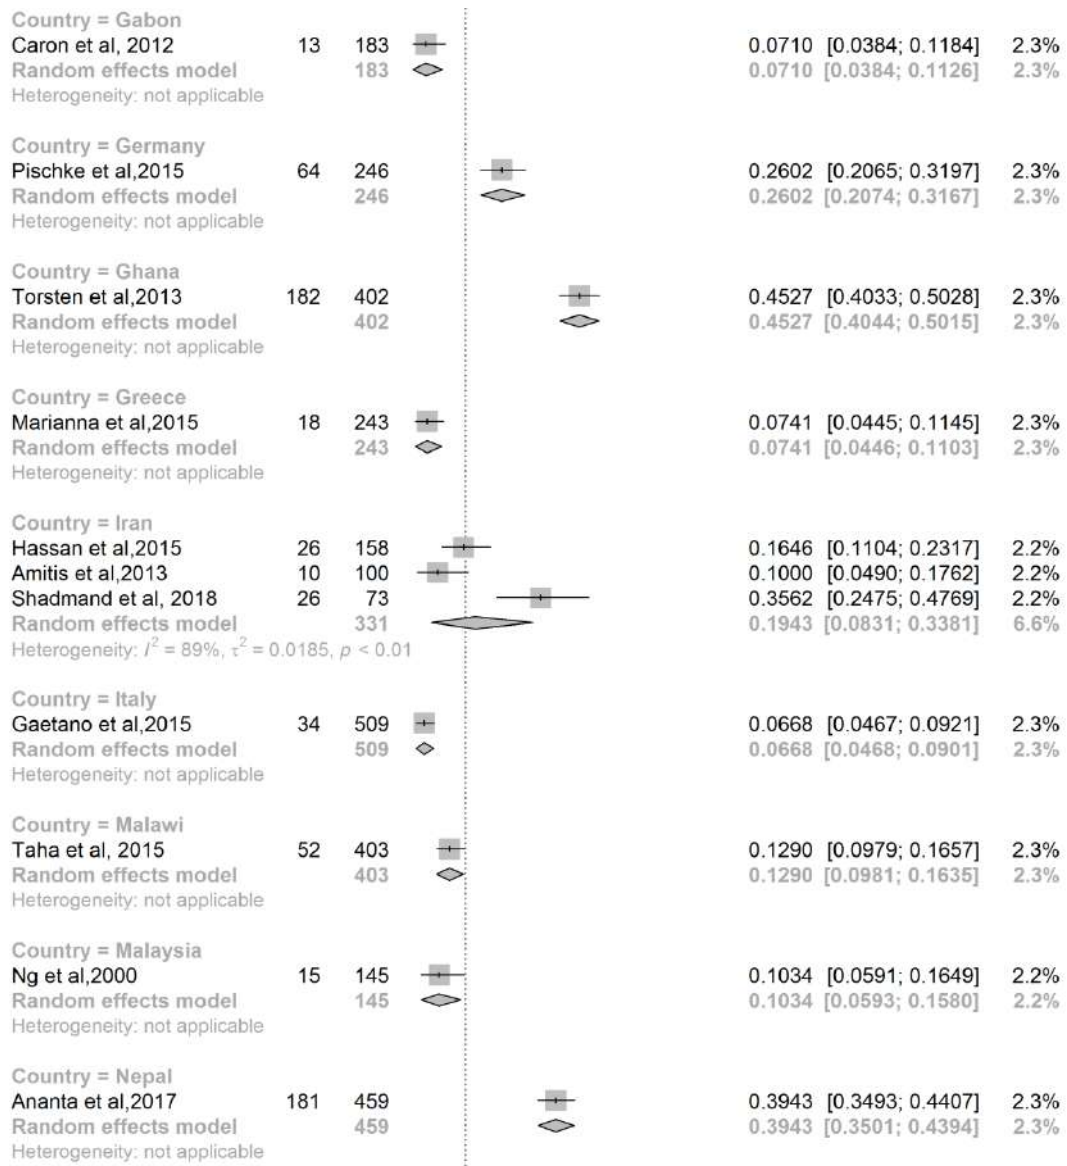



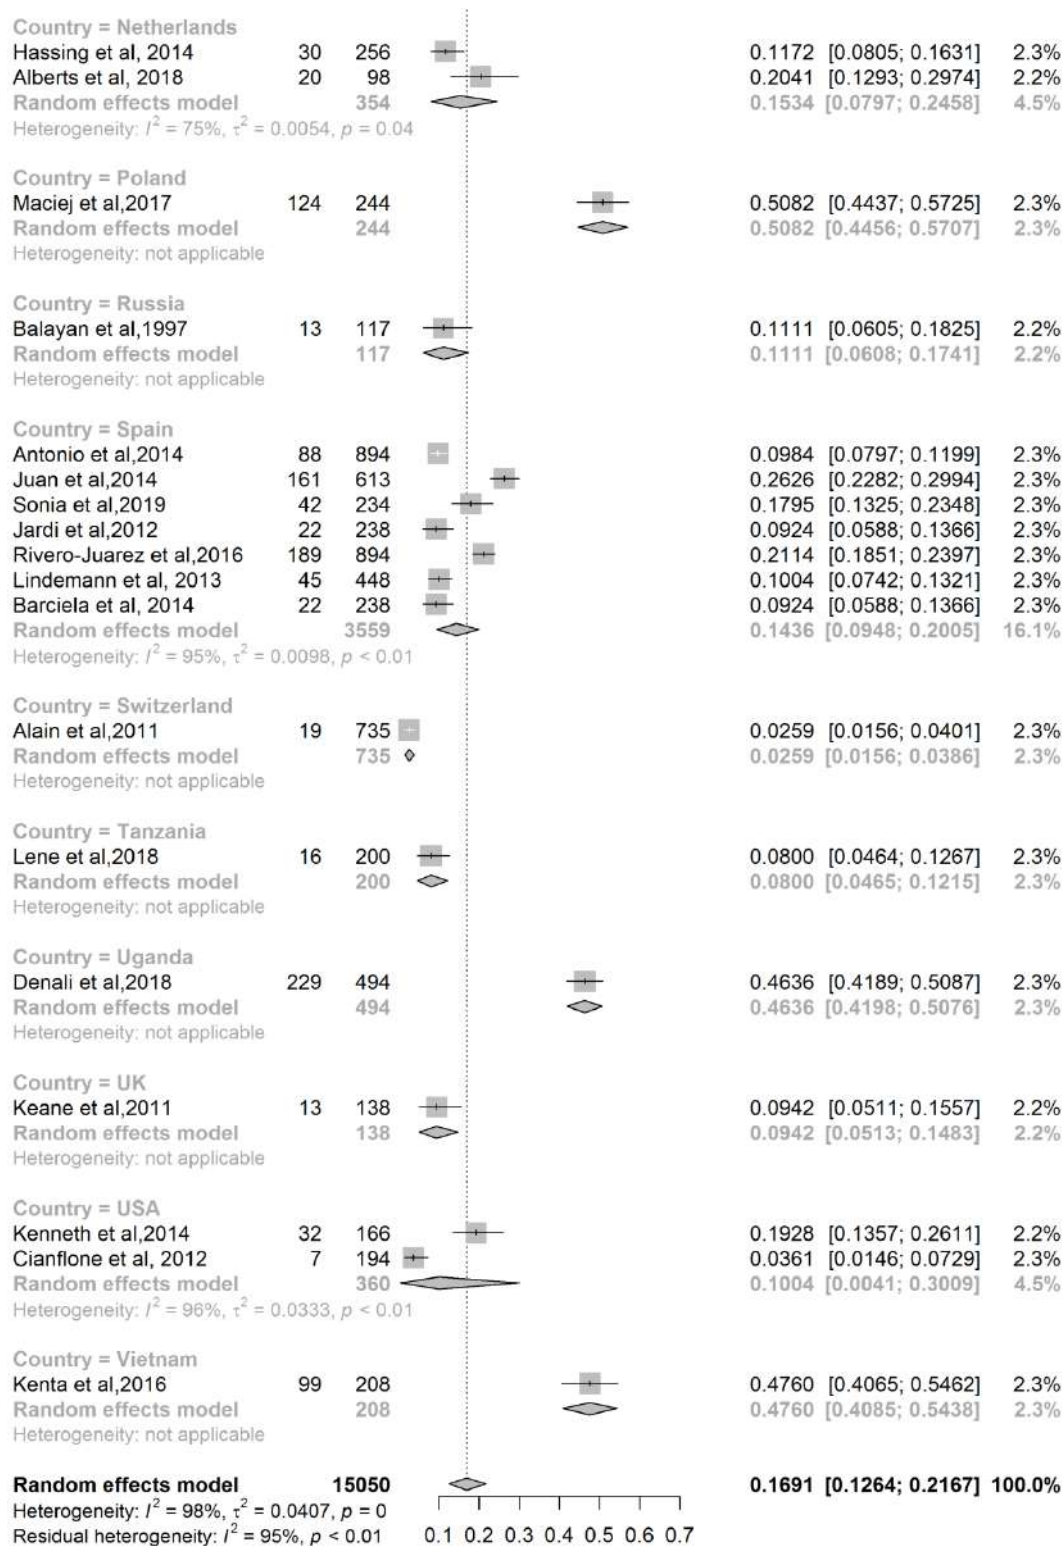

**Figure S21. Forest plot of estimated pooled seroprevalence of anti-HEV IgM among HIV population based on different countries.**

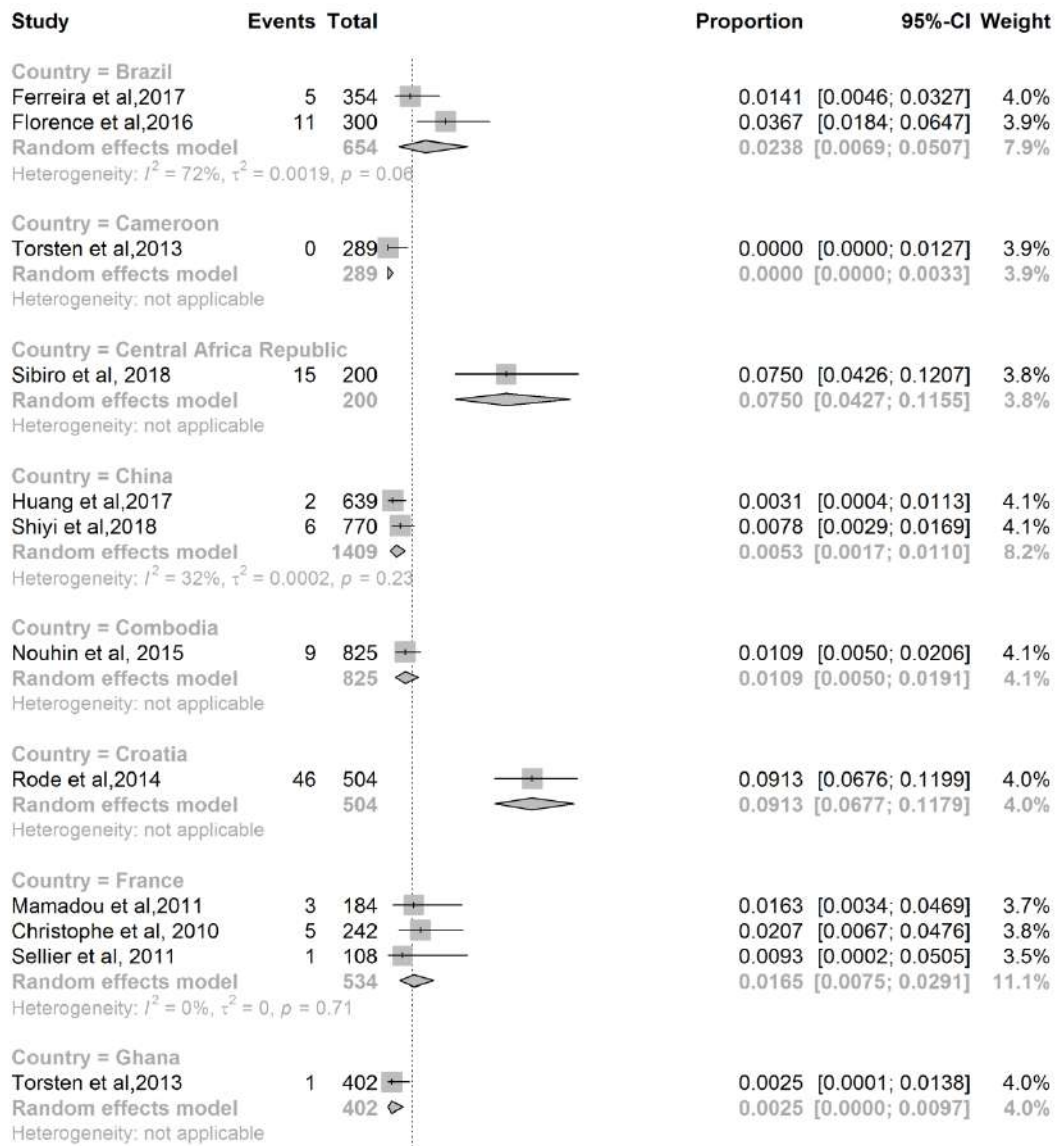

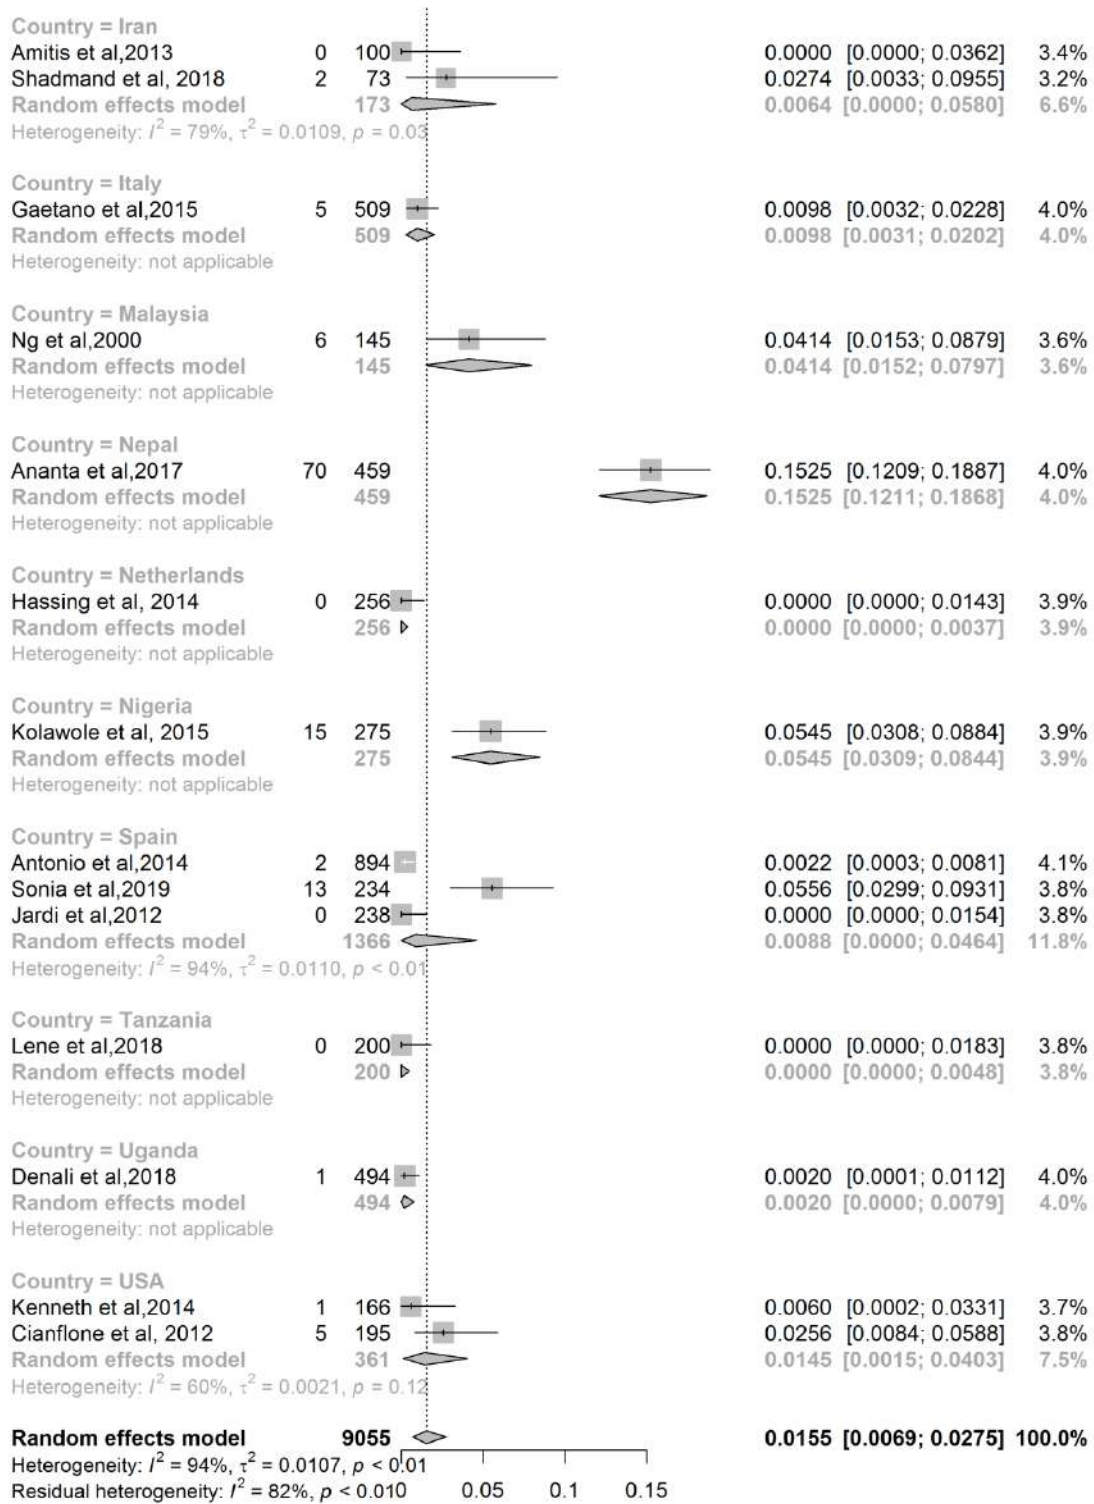



**Figure S22. Forest plot of estimated pooled HEV RNA positive rate among HIV population based on different countries.**

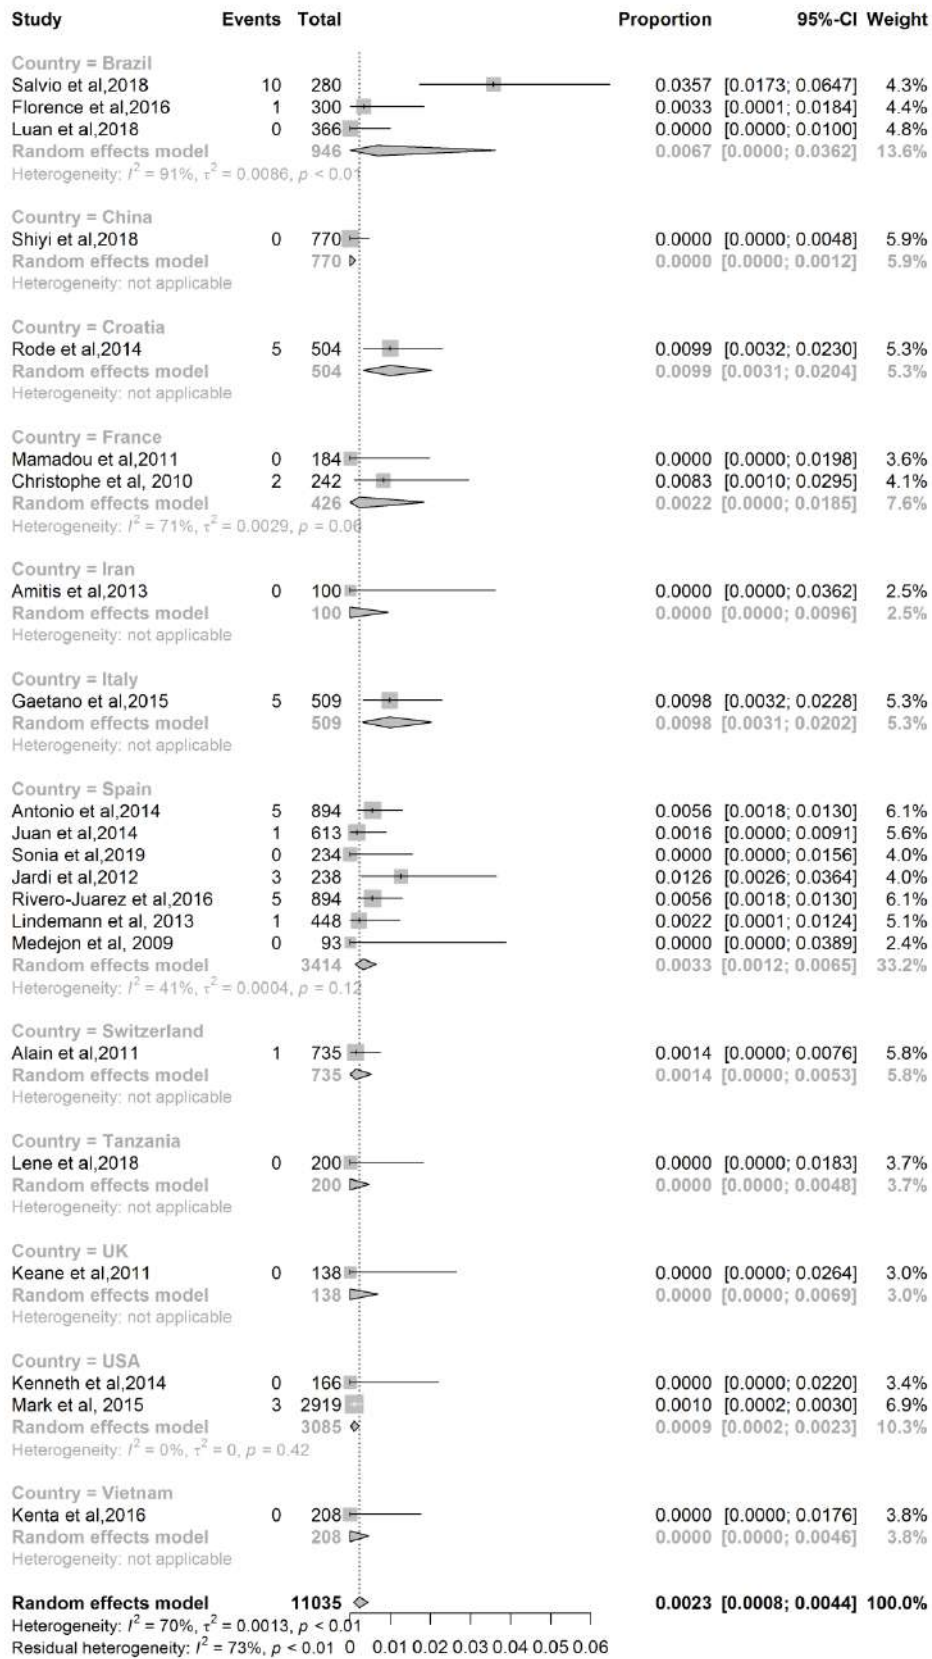

**Figure S23. Forest plot of estimated pooled seroprevalence of anti-HEV IgG among transplant population based on different countries.**

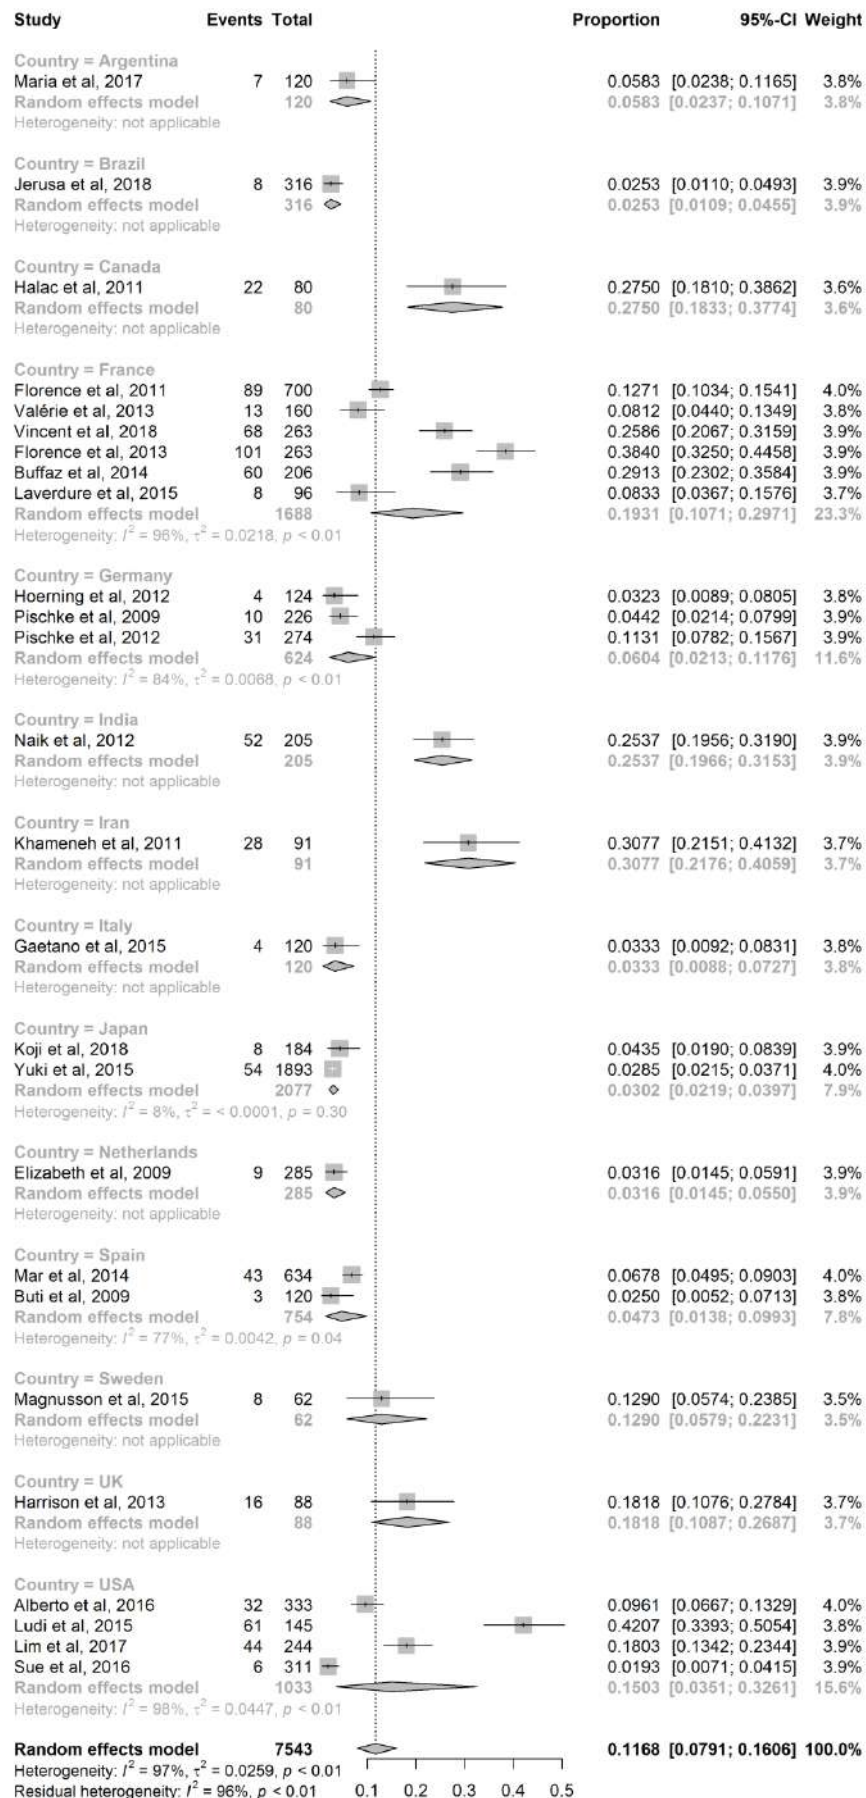

**Figure S24. Forest plot of estimated pooled seroprevalence of anti-HEV IgM among transplant population based on different countries.**

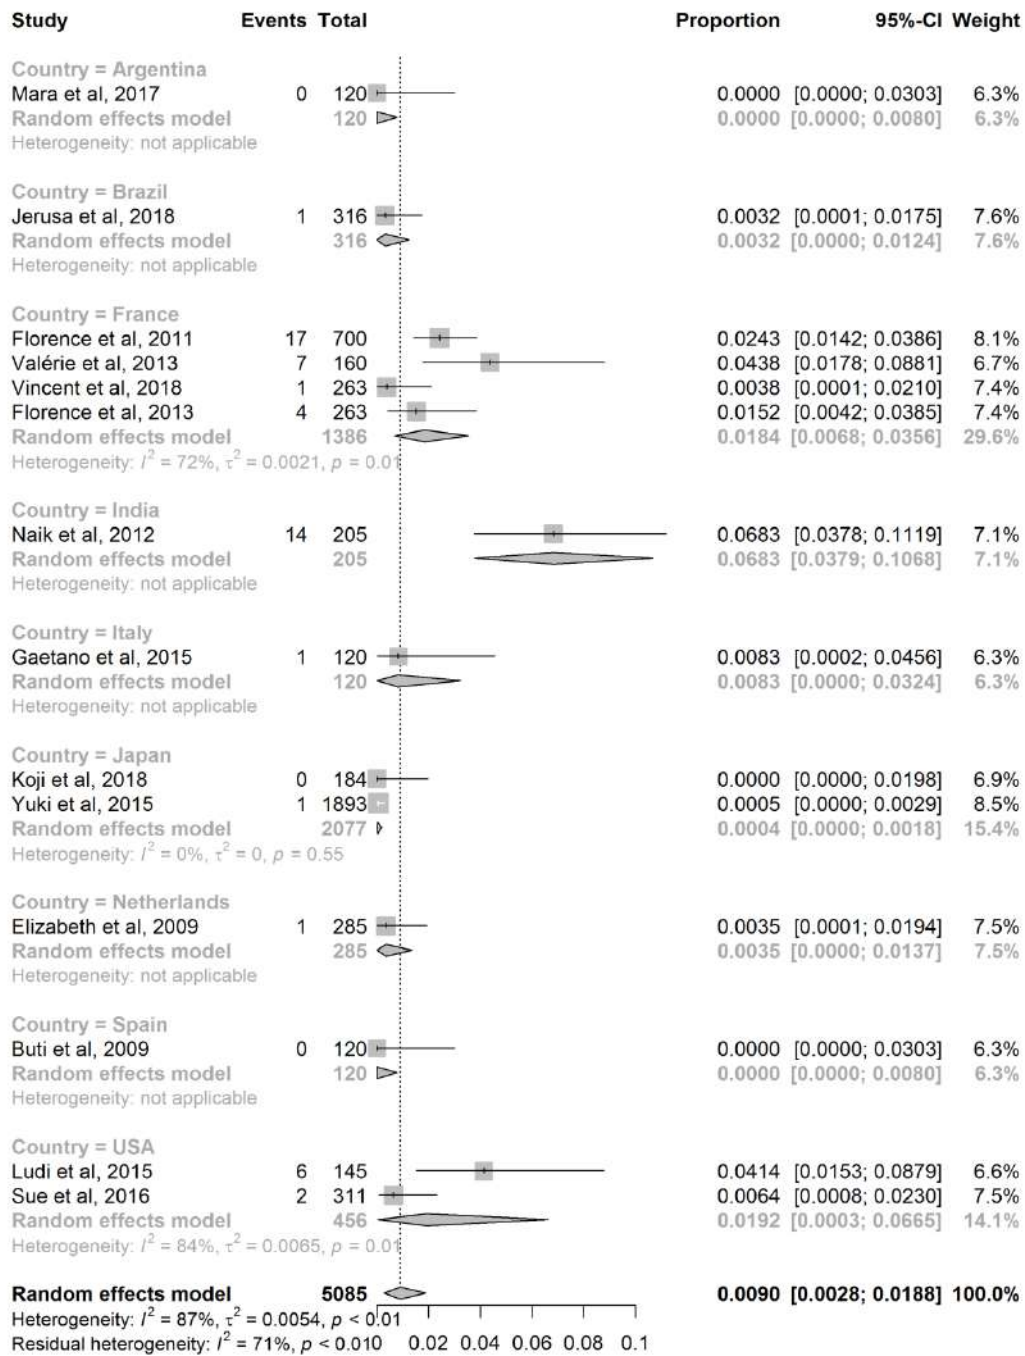



**Figure S25. Forest plot of estimated pooled HEV RNA positive rate among transplant population based on different countries.**

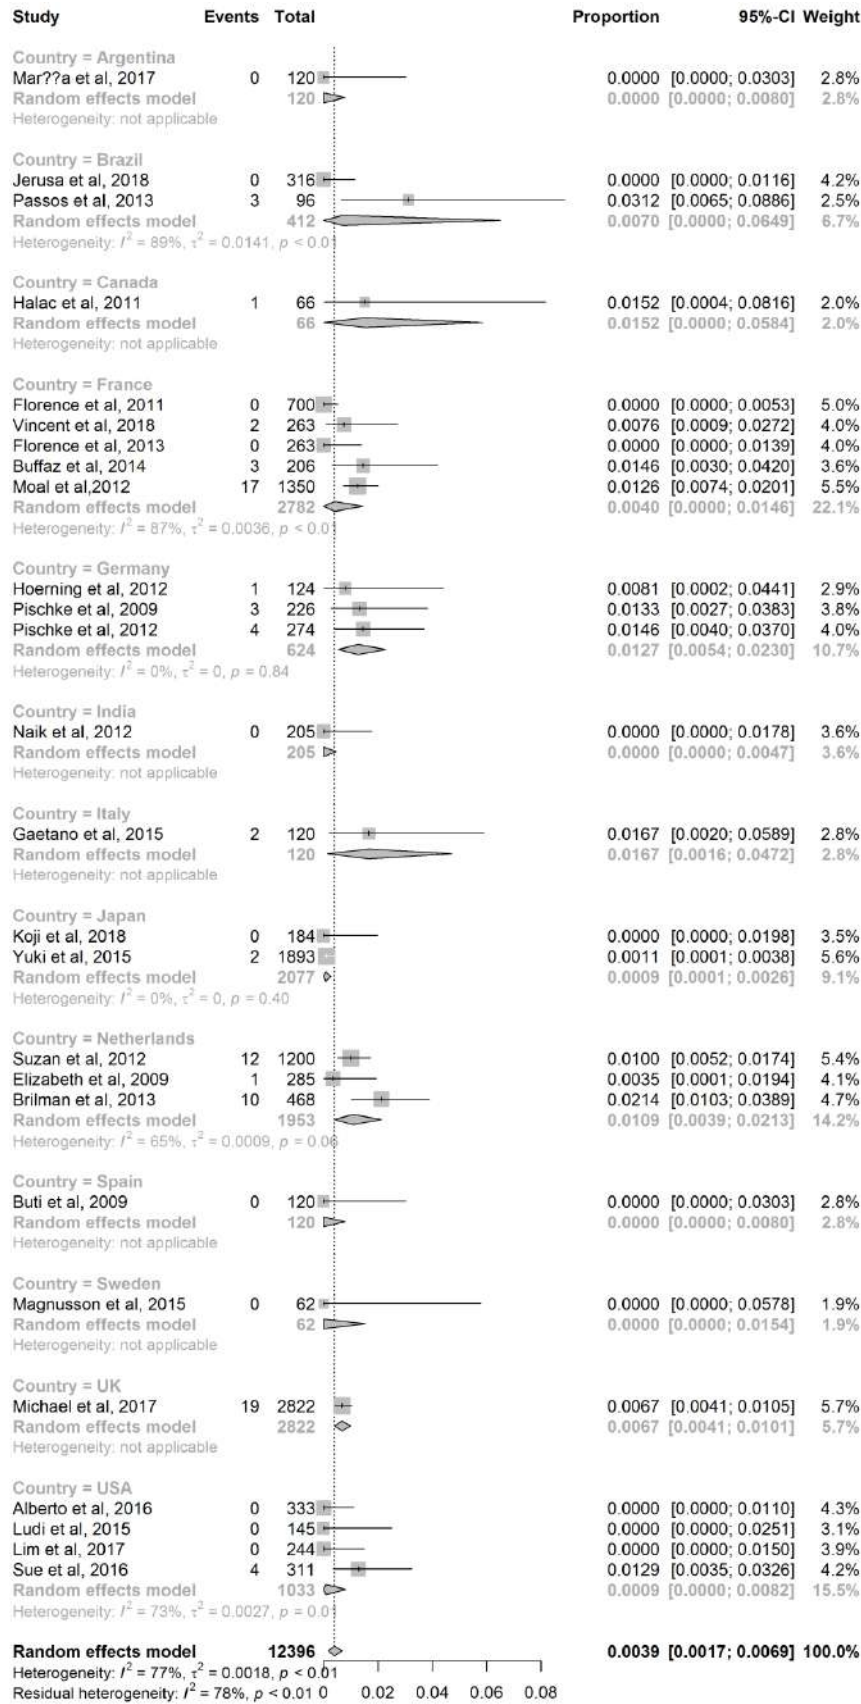

**Figure S26. Forest plot of estimated pooled seroprevalence of anti-HEV IgG among hemodialysis population based on different countries.**

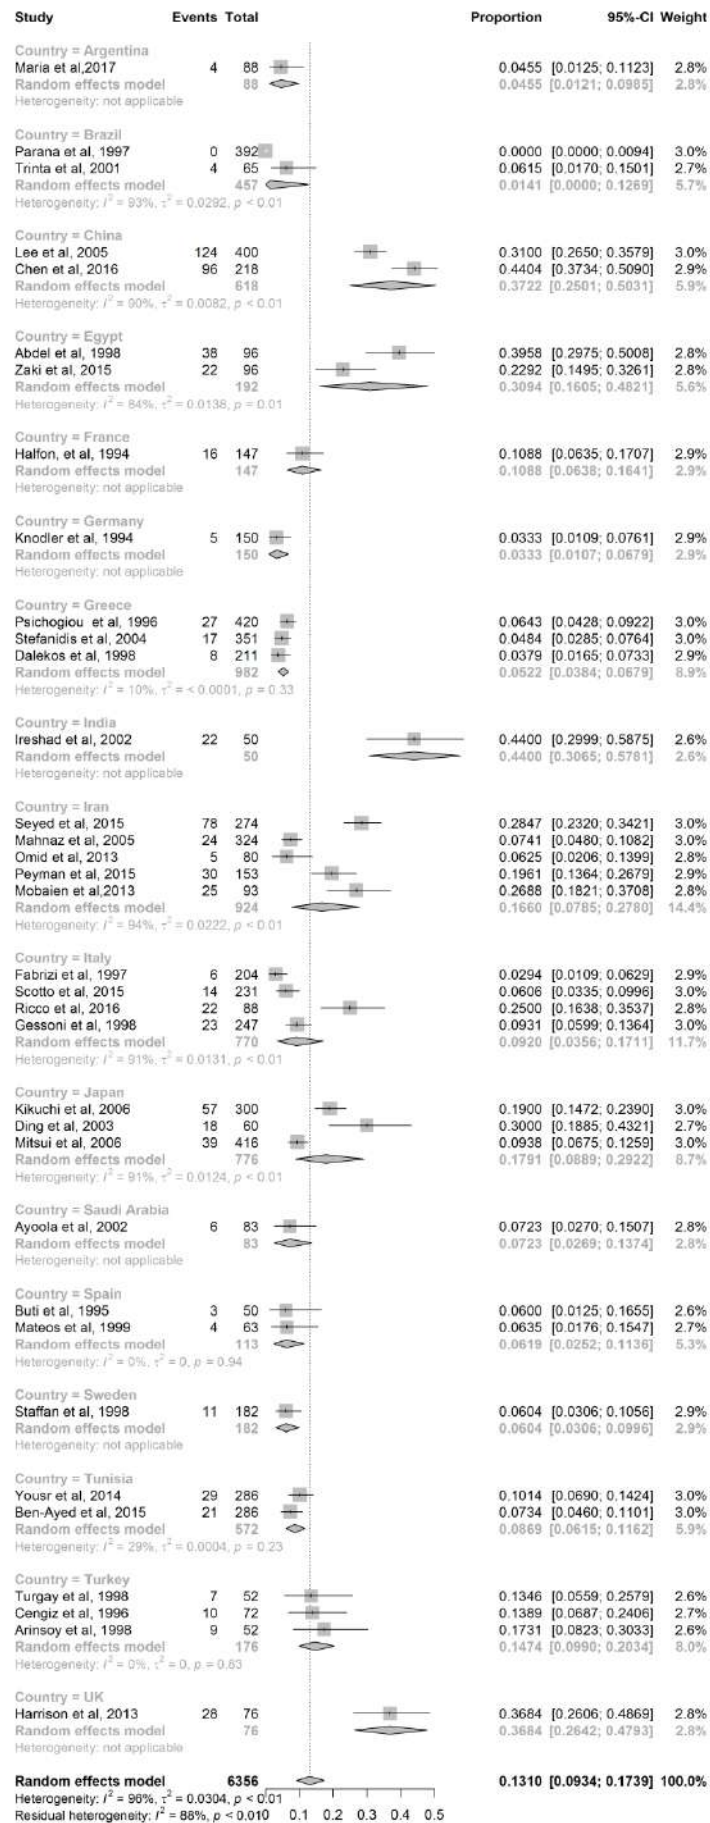

**Figure S27. Forest plot of estimated pooled seroprevalence of anti-HEV IgM among hemodialysis population based on different countries.**

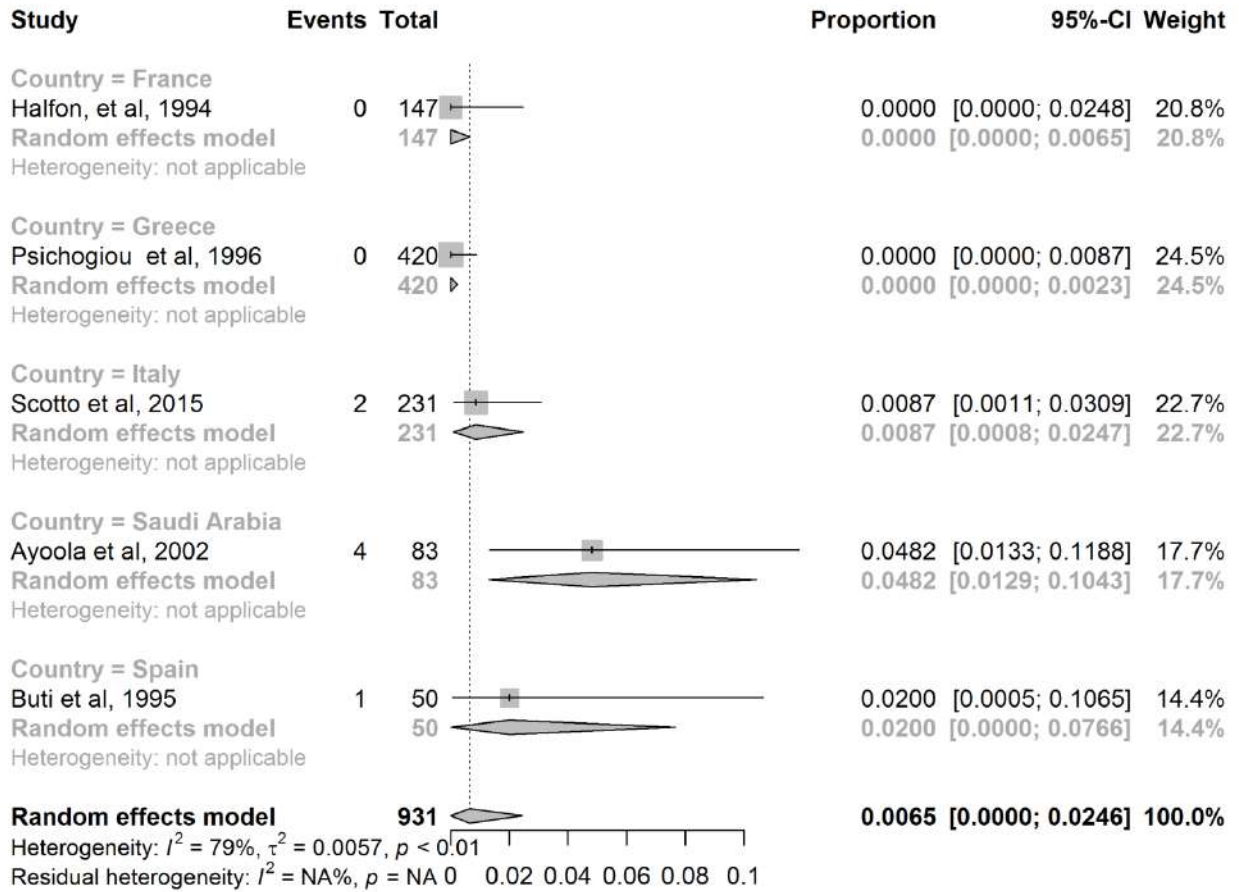



**Figure S28. Pooled Odd Ratios of anti-HEV IgG seroprevalence to investigate the risk factors for HEV infection among general population.**

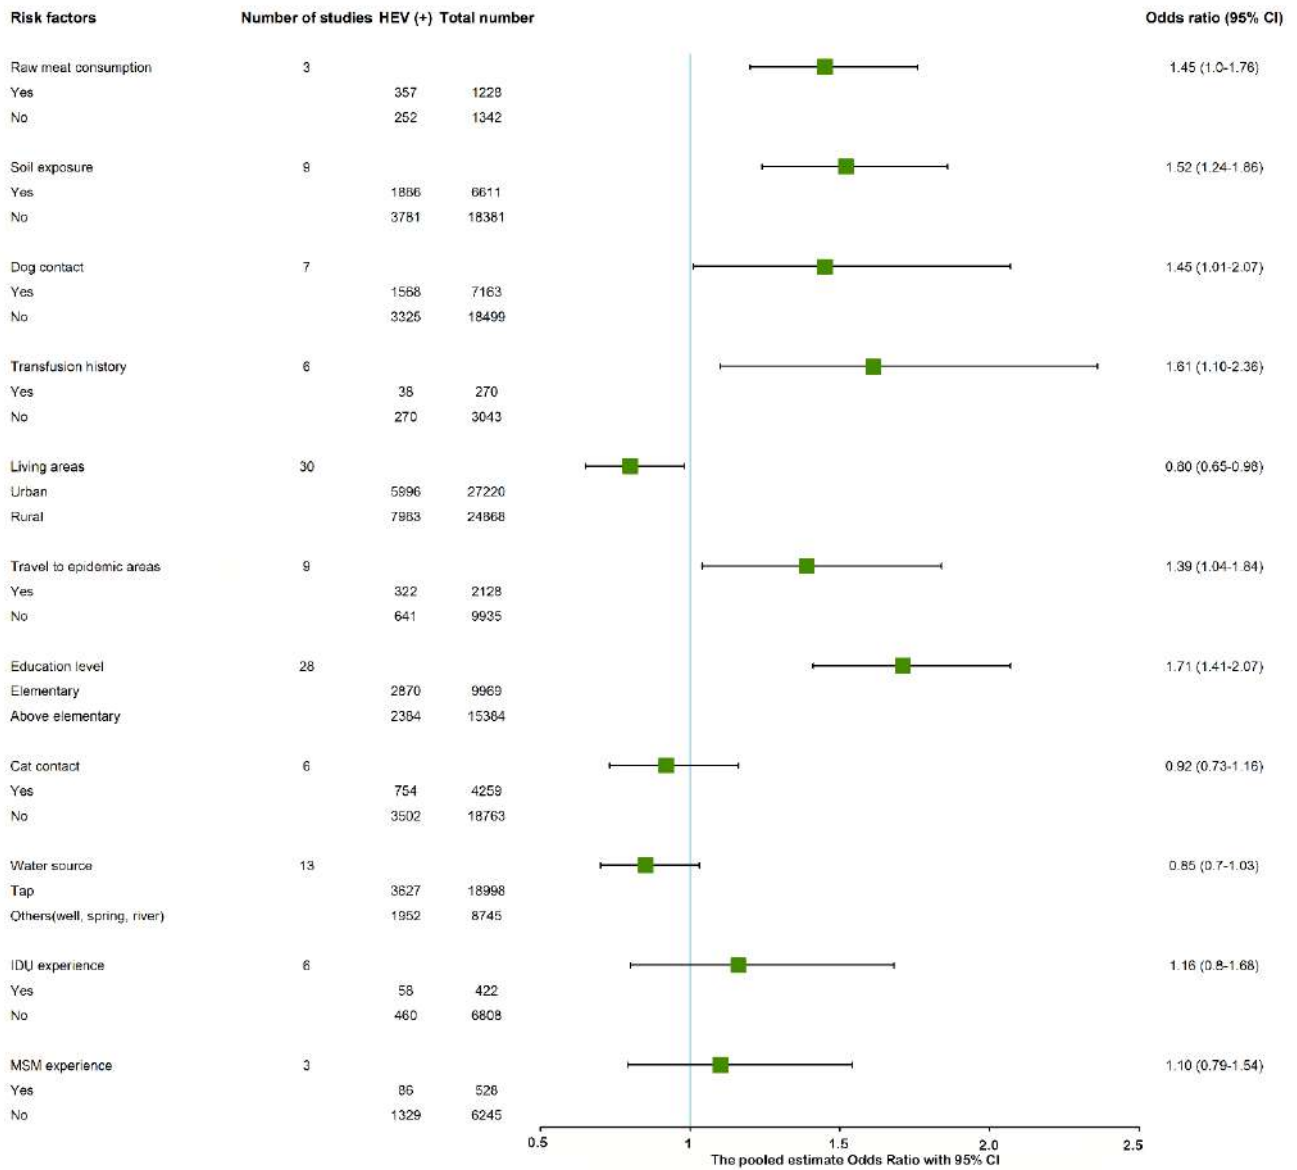

**Figure S29. Odds ratio analysis of anti-HEV seroprevalence for people contacting dogs or not in general population.**

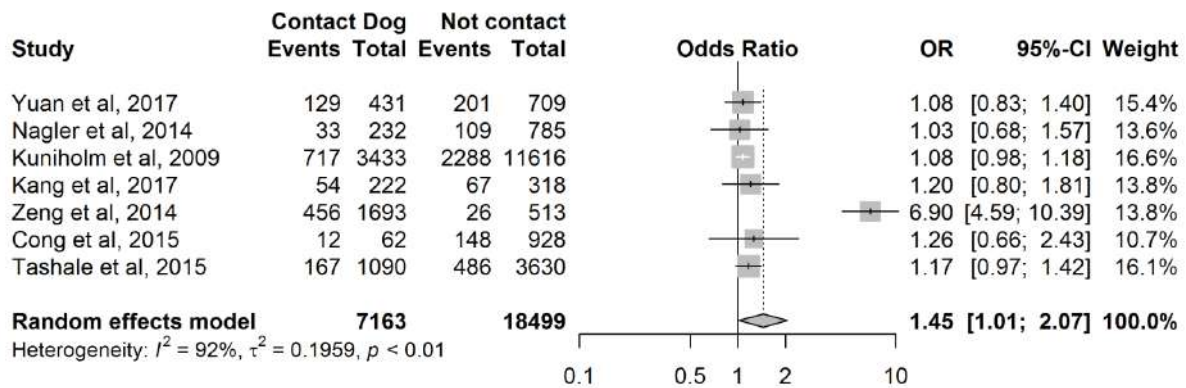

**Figure S30. Odds ratio analysis of anti-HEV IgG seroprevalence for people contacting cats or not in general population.**

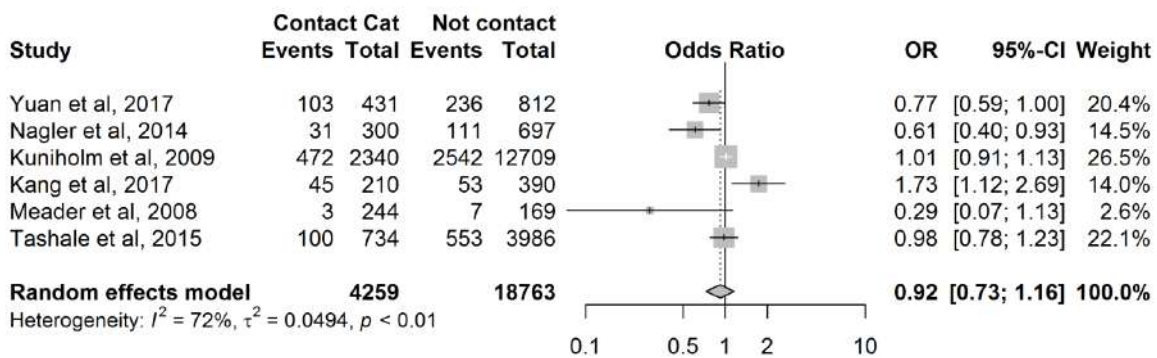

**Figure S31. Odds ratio analysis of anti-HEV IgG seroprevalence for people with or without blood transfusion in general population.**

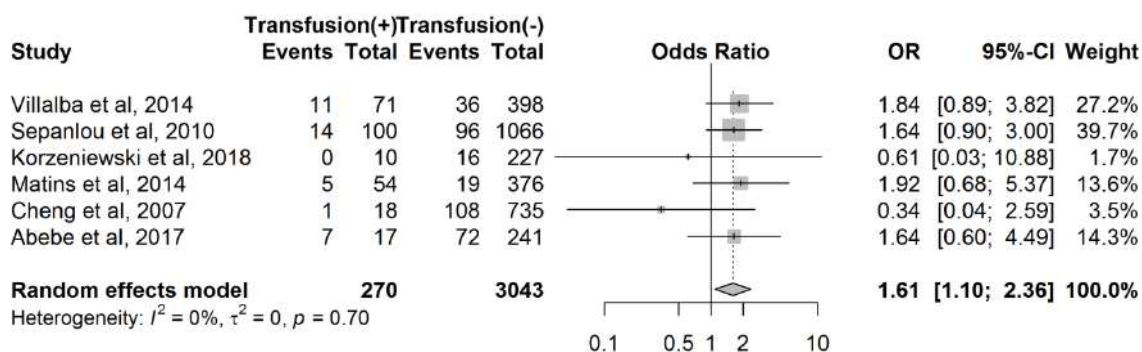

**Figure S32. Odds ratio analysis of anti-HEV IgG seroprevalence for people with or without consumption of raw meat in general population.**

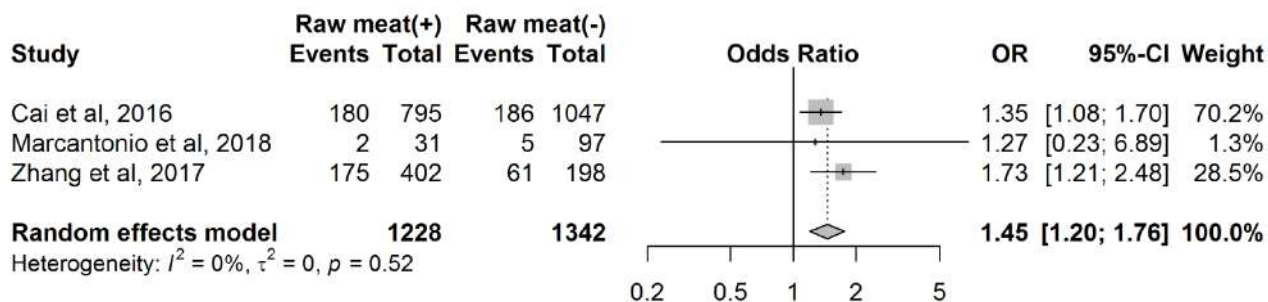

**Figure S33. Odds ratio analysis of anti-HEV IgG seroprevalence for people frequently exposed to soil or unexposed to soil in general population.**

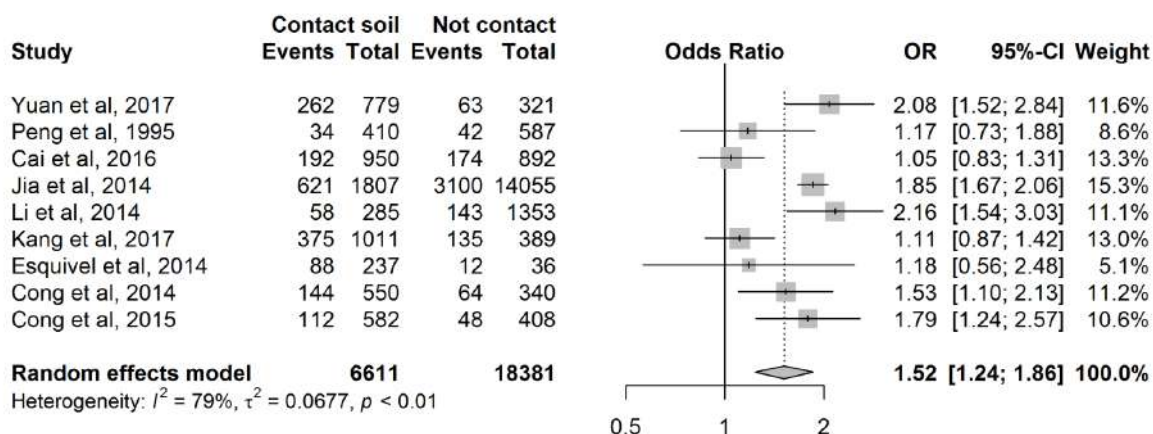

**Figure S34. Odds ratio analysis of anti-HEV IgG seroprevalence for people with or without travelling to endemic areas in general population.**

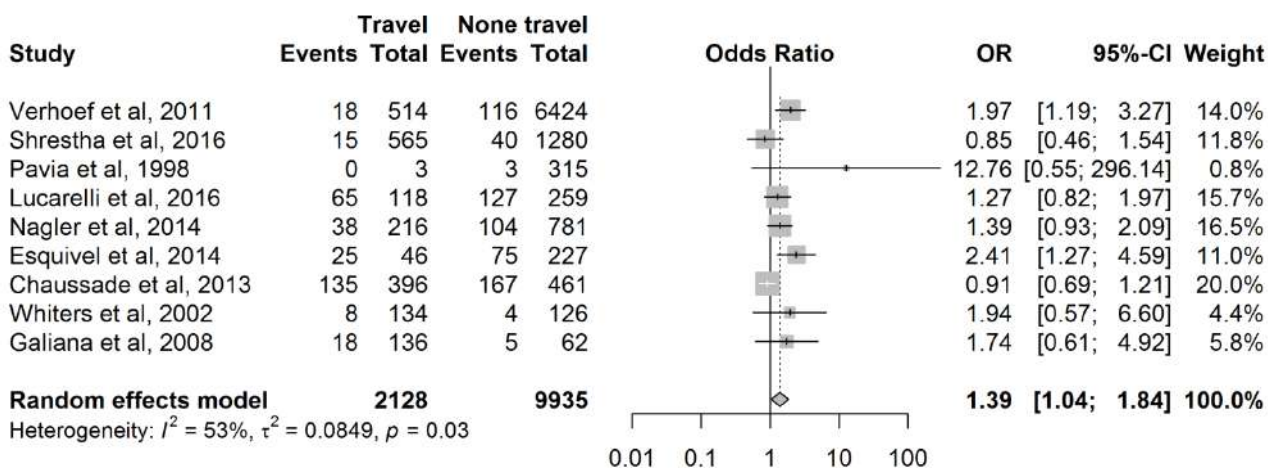



**Figure S35. Odds ratio analysis of anti-HEV IgG seroprevalence for urban residents or rural residents in general population.**

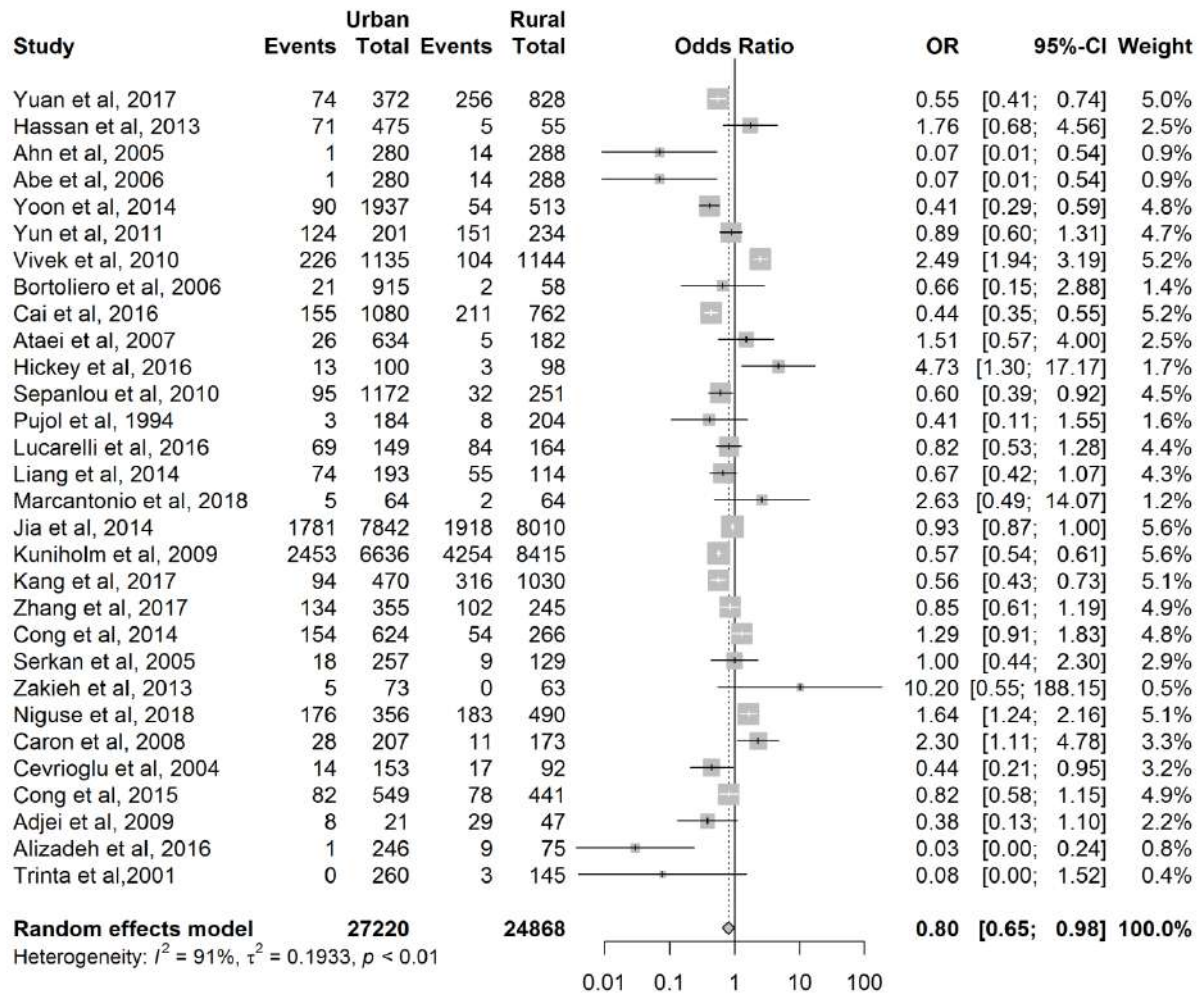

**Figure S36. Odds ratio analysis of anti-HEV IgG seroprevalence for people receiving water source of tap or none tap in general population.**

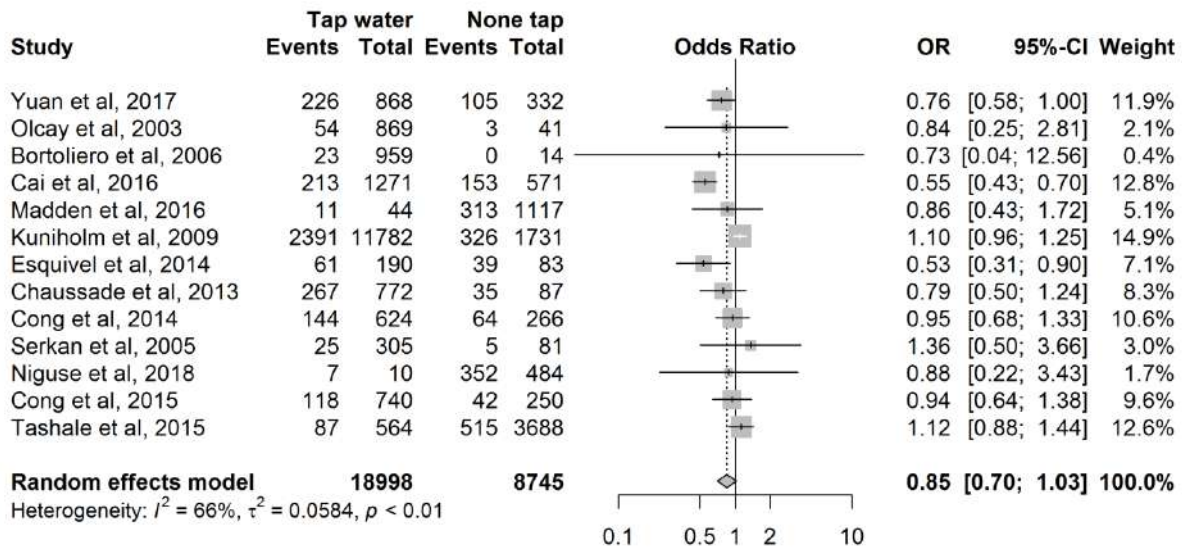

**Figure S37. Odds ratio analysis of anti-HEV IgG seroprevalence for people accepting education of elementary or above elementary in general population.**

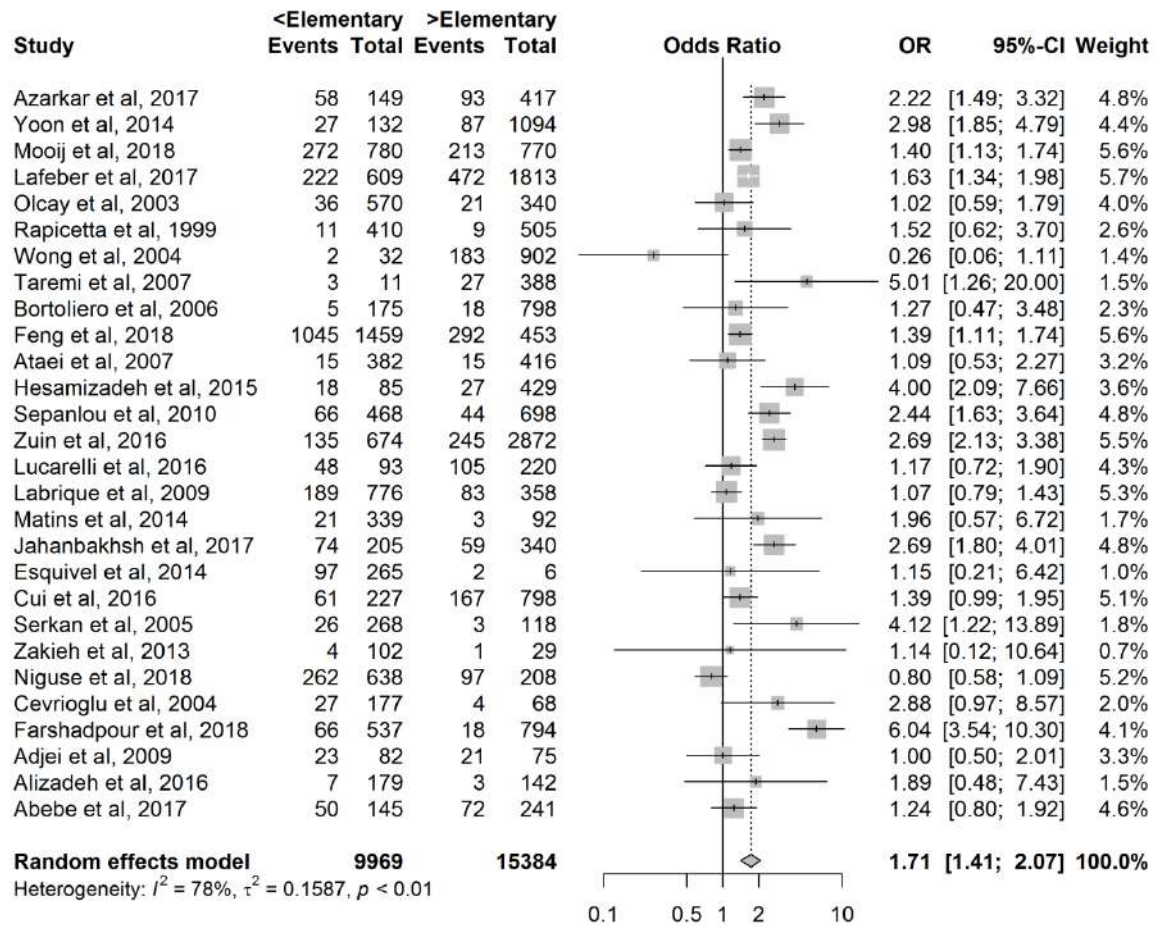



**Figure S38. Odds ratio analysis of anti-HEV IgG seroprevalence for people with or without MSM experience in general population.**

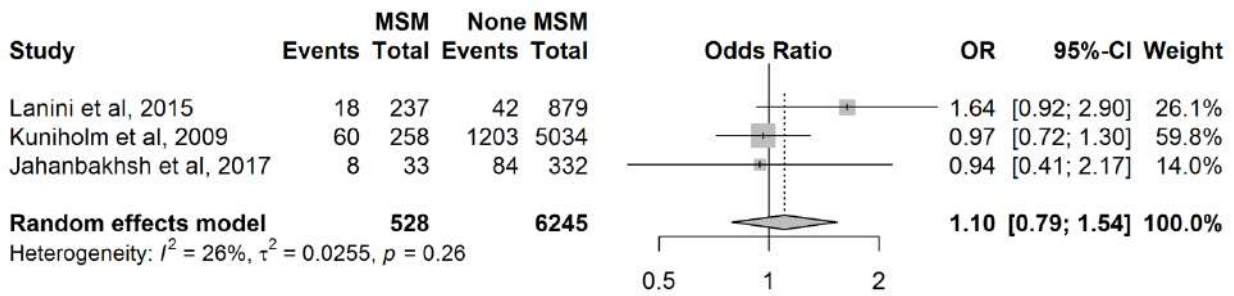

**Figure S39. Odds ratio analysis of anti-HEV IgG seroprevalence for people with or without IDU experience in general population.**

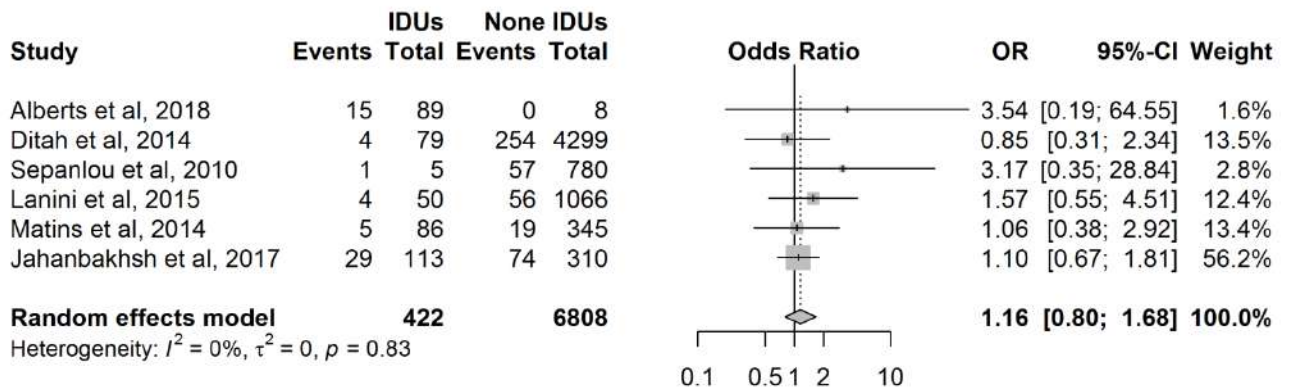

**Figure S40. Forest plot of estimated pooled anti-HEV IgG seroprevalence among general population based on different ELISA manufactures.**

Note: Those own in-house assays and uncommon commercial kits are classified as ‘Others’

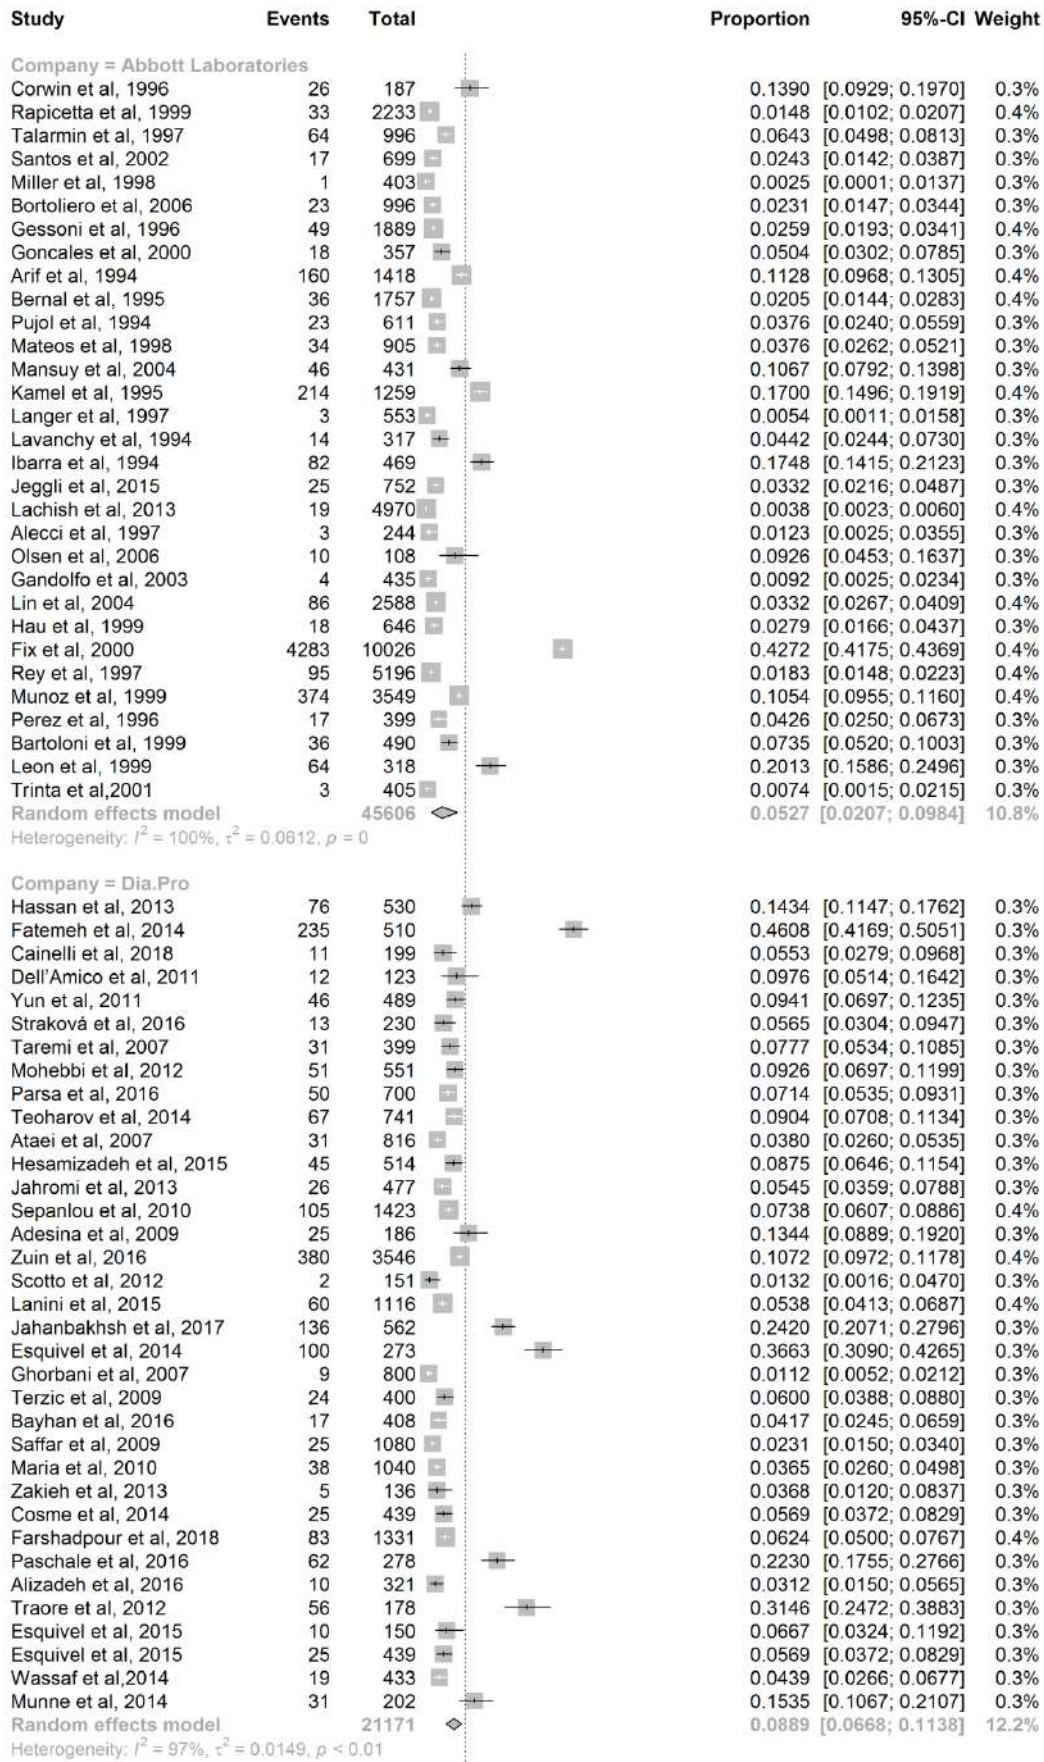



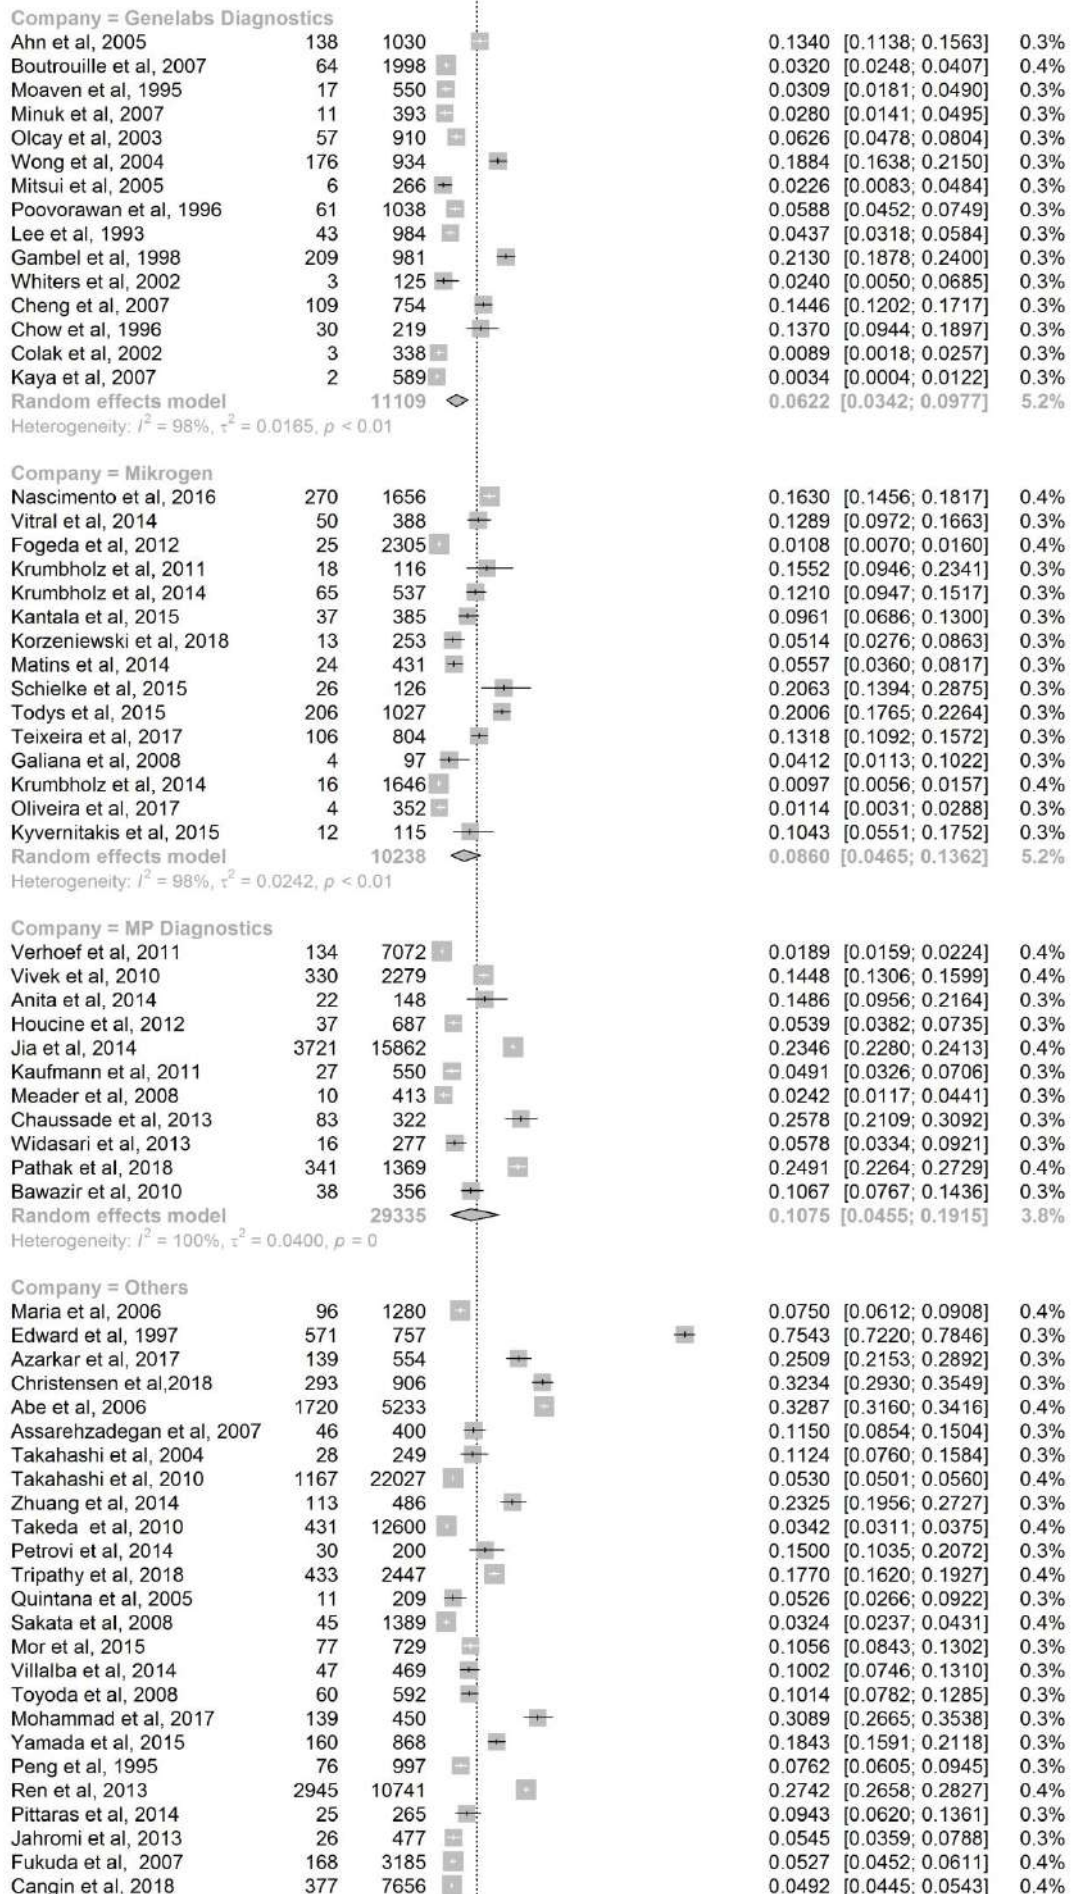



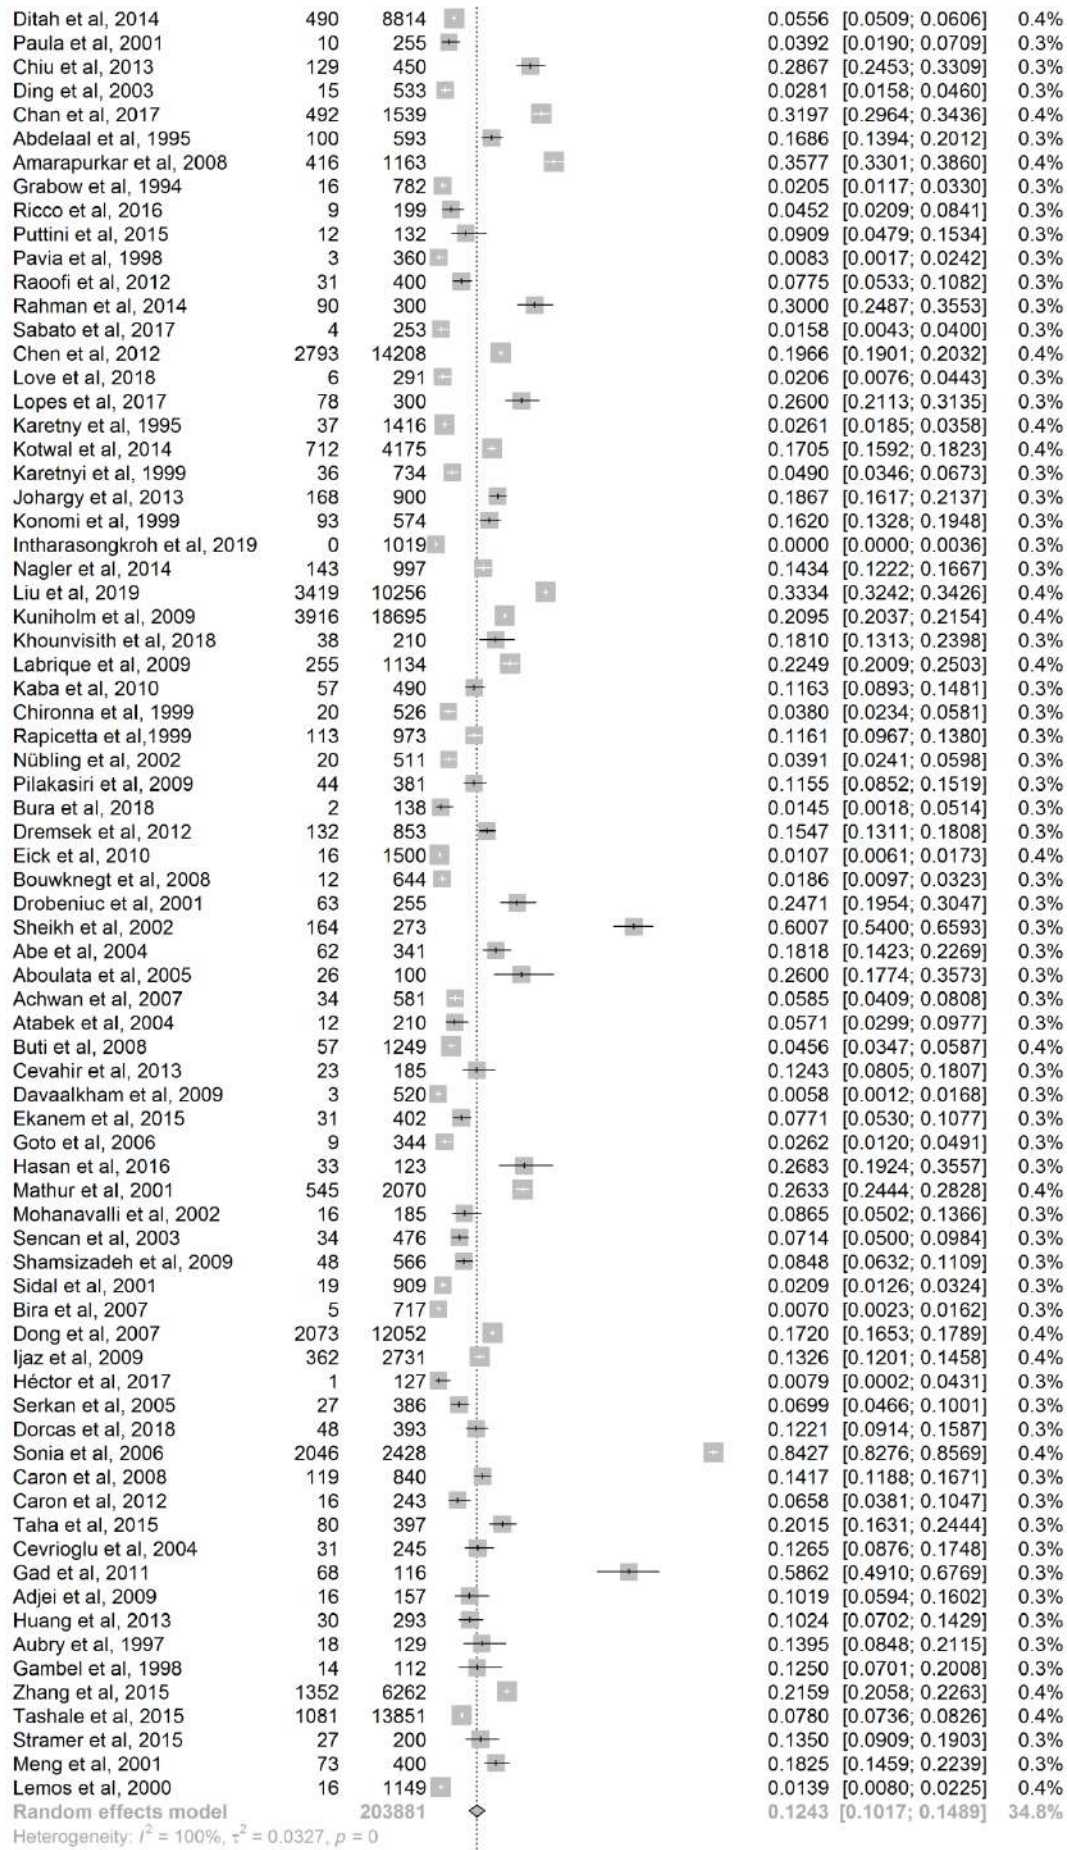

Company = Wantai

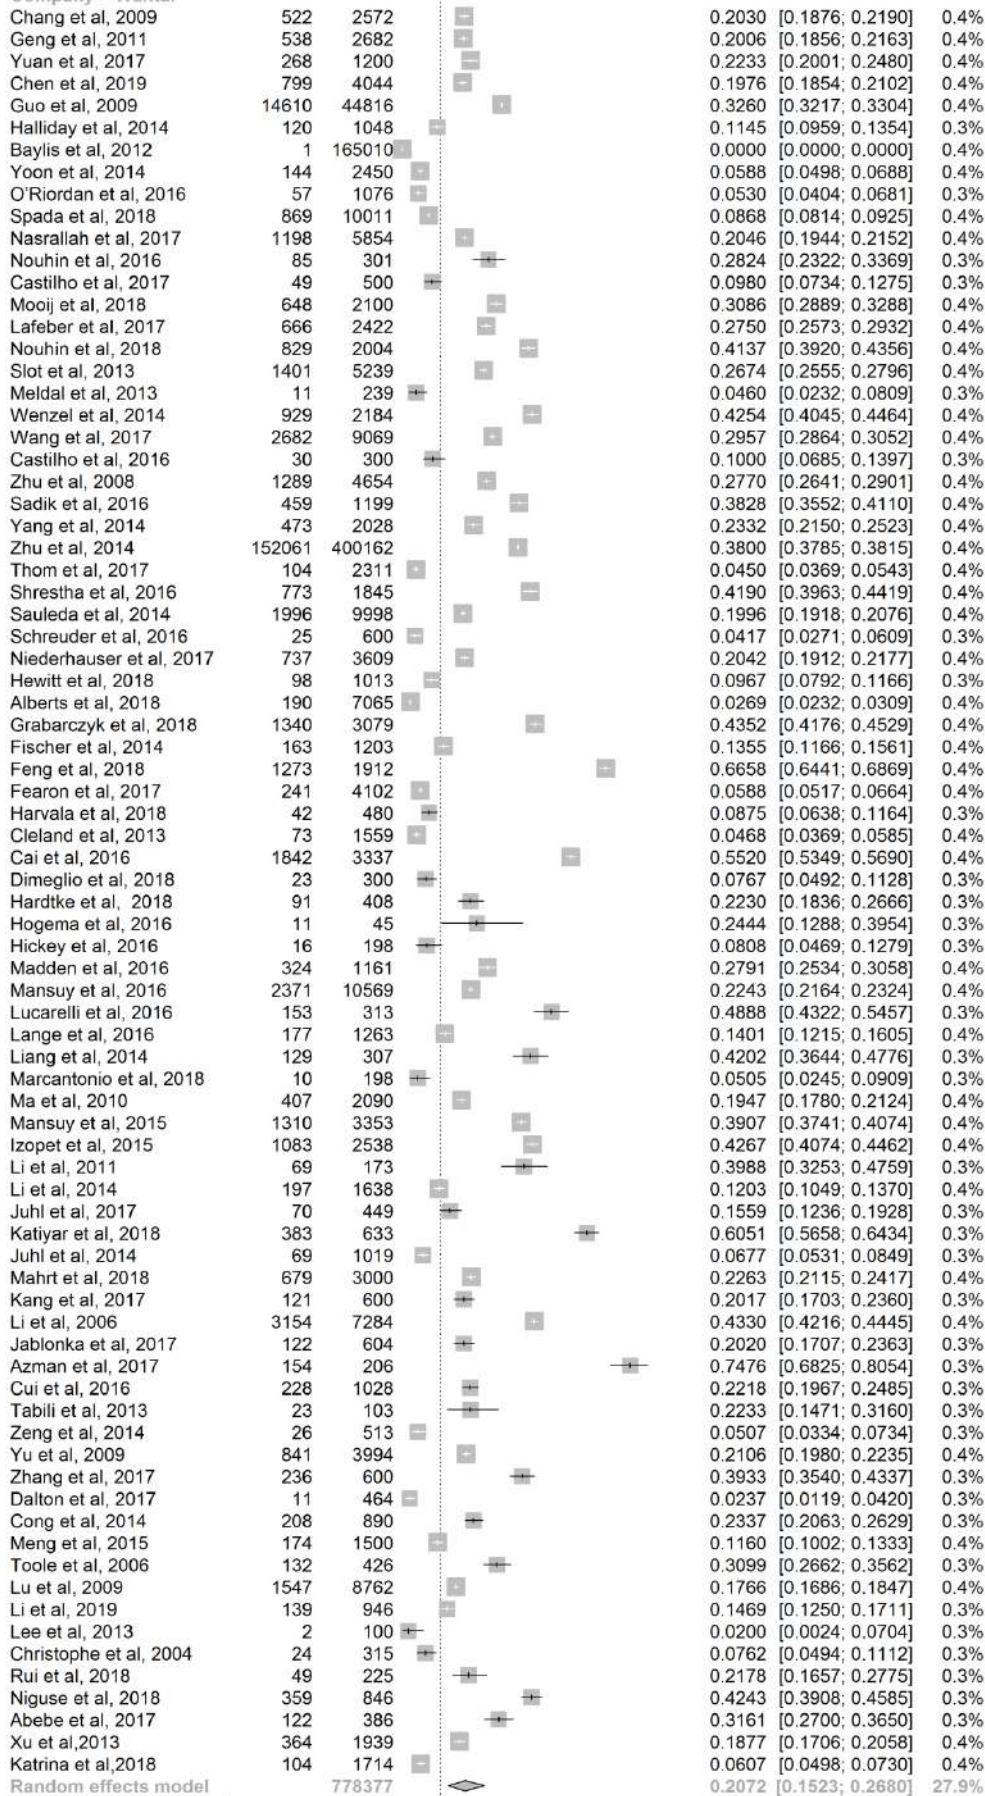

Random effects model

Heterogeneity:  $I^2 = 100\%$ ,  $\tau^2 = 0.0769$ ,  $p = 0$

Residual heterogeneity:  $I^2 = 100\%$ ,  $p = 0$

**Figure S41. Funnel plot for anti-HEV IgG seroprevalence among general population.**

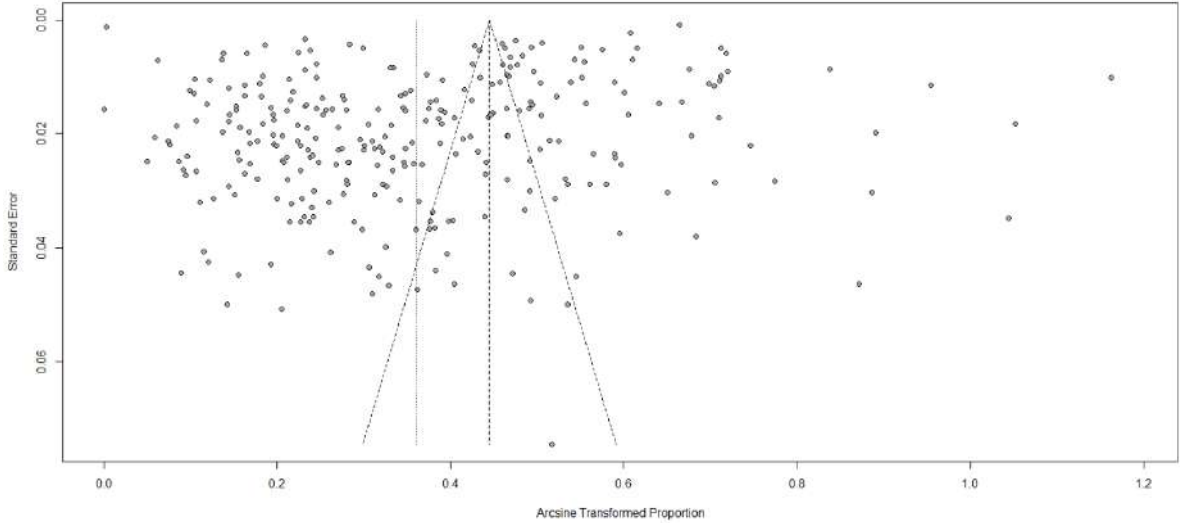

**Figure S42. Egger plot for anti-HEV IgG seroprevalence among general population.**

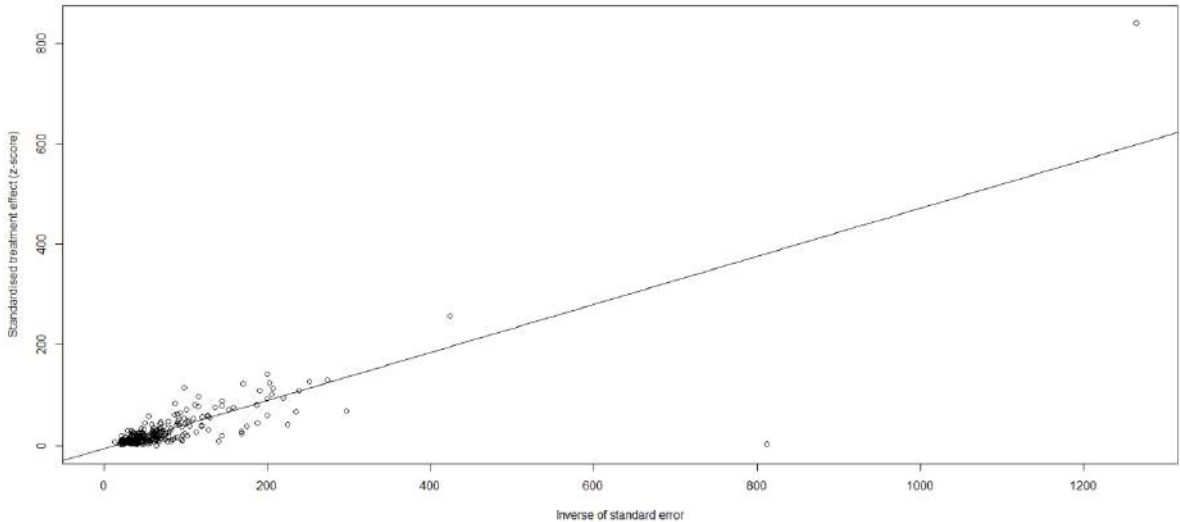



**Table S1. Score of studies evaluated by JBI Critical Appraisal Tools.**

1. Was the sample frame appropriate to address the target population?
2. Were study participants sampled in an appropriate way?
3. Was the sample size adequate?
4. Were the study subjects and the setting described in detail?
5. Was the data analysis conducted with sufficient coverage of the identified sample?
6. Were valid methods used for the identification of the condition?
7. Was the condition measured in a standard, reliable way for all participants?
8. Was there appropriate statistical analysis?
9. Was the response rate adequate, and if not, was the low response rate managed appropriately?

| <b>Study</b>                 | <b>1</b> | <b>2</b> | <b>3</b> | <b>4</b> | <b>5</b> | <b>6</b> | <b>7</b> | <b>8</b> | <b>9</b> | <b>Score</b> |
|------------------------------|----------|----------|----------|----------|----------|----------|----------|----------|----------|--------------|
| Legrand-Abravanel et al,2011 | ✓        | ✓        | ✓        | ✓        | ✓        | ✓        | ?        | ✓        | ✓        | 8            |
| Haagsma et al,2009           | ✓        | ✓        | ✓        | ✓        | ✓        | ✓        | ?        | ✓        | ✓        | 8            |
| Hoerning et al,2012          | ✓        | ?        | ✓        | ?        | ✓        | ✓        | ?        | ✓        | ✓        | 6            |
| Pischke et al,2010           | ✓        | ✓        | ✓        | ?        | ✓        | ✓        | ✓        | ✓        | ✓        | 8            |
| Halac et al,2012             | ✓        | ✓        | ✓        | ✓        | ✓        | ✓        | ?        | ✓        | ✓        | 8            |
| Rostamzadeh et al,2011       | ✓        | ✓        | ✓        | ✓        | ✓        | ✓        | ?        | ✓        | ✓        | 8            |
| Pischke et al, 2012          | ✓        | ✓        | ✓        | ✓        | ✓        | ✓        | ?        | ✓        | ✓        | 8            |
| Scotto et al,2015            | ✓        | ?        | ✓        | ✓        | ✓        | ✓        | ?        | ✓        | ✓        | 7            |
| Pisano et al,2017            | ✓        | ✓        | ✓        | ✓        | ✓        | ✓        | ?        | ✓        | ✓        | 7            |
| Nanmoku et al,2019           | ✓        | ✓        | ✓        | ✓        | ✓        | ✓        | ?        | ✓        | ✓        | 8            |
| Unzueta et al,2016           | ✓        | ✓        | ✓        | ✓        | ✓        | ✓        | ?        | ✓        | ✓        | 8            |
| Naik et al,2013              | ✓        | ?        | ✓        | -        | ✓        | ✓        | ?        | ✓        | ✓        | 6            |
| Moal et al,2013              | ✓        | ✓        | ✓        | ✓        | ✓        | ✓        | ?        | ✓        | ✓        | 8            |
| Koning et al,2015            | ✓        | ✓        | ✓        | ✓        | ✓        | ✓        | ✓        | ✓        | ✓        | 9            |
| Inagaki et al,2015           | ✓        | ✓        | ✓        | ✓        | ✓        | ✓        | ✓        | ✓        | ✓        | 9            |
| Mallet et al,2018            | ✓        | ✓        | ✓        | ✓        | ✓        | ✓        | ✓        | ✓        | ✓        | 9            |
| de Oliveira et al,2018       | ✓        | ✓        | ✓        | ✓        | ✓        | ✓        | ✓        | ✓        | ✓        | 9            |
| Buffaz et al, 2014           | ✓        | ?        | ✓        | ✓        | ✓        | ✓        | ?        | ✓        | ✓        | 7            |
| Abravanel et al,2014         | ✓        | ✓        | ✓        | ✓        | ✓        | ✓        | ?        | ✓        | ✓        | 8            |
| Pas et al,2012               | ✓        | ✓        | ✓        | ✓        | ✓        | ✓        | ✓        | ✓        | ✓        | 9            |
| Riezebos-Brilman et al,2013  | ✓        | ✓        | ✓        | -        | ✓        | ✓        | ?        | ✓        | ✓        | 7            |
| Passos et al,2013            | ✓        | ?        | ✓        | ✓        | ✓        | ✓        | ?        | ✓        | ✓        | 7            |
| Ankorn et al,2018            | ✓        | ✓        | ✓        | ✓        | ✓        | ✓        | ?        | ✓        | ✓        | 8            |
| Kamar et al,2008             | ✓        | ✓        | ✓        | ✓        | ✓        | ✓        | ?        | ✓        | ✓        | 8            |
| Moal et al,2013              | ✓        | ✓        | ✓        | ✓        | ✓        | ✓        | ?        | ✓        | ✓        | 8            |
| Lim et al,2018               | ✓        | ✓        | ✓        | ✓        | ✓        | ✓        | ?        | ✓        | ✓        | 8            |
| Buti et al,2010              | ✓        | ✓        | ✓        | ✓        | ✓        | ✓        | ?        | ✓        | ✓        | 8            |
| Laverdure et al, 2015        | ✓        | ✓        | ✓        | ✓        | ✓        | ✓        | ?        | ✓        | ✓        | 8            |
| Magnusson et al,2015         | ✓        | ✓        | ✓        | ✓        | ✓        | ✓        | ?        | ✓        | ✓        | 8            |
| Lee et al,2005               | ✓        | ✓        | ✓        | ✓        | ✓        | ✓        | ✓        | ✓        | ✓        | 9            |
| Psichogiou et al,1996        | ✓        | ✓        | ✓        | -        | ✓        | ✓        | ✓        | ✓        | ✓        | 8            |
| Dalekos et al,1998           | ✓        | ?        | ✓        | ×        | ✓        | ✓        | ✓        | ✓        | ✓        | 7            |
| Abdel et al,1998             | ✓        | ✓        | ✓        | ✓        | ✓        | ✓        | ✓        | ✓        | ✓        | 9            |
| Harrison et al,2013          | ✓        | ✓        | ✓        | ✓        | ✓        | ✓        | ✓        | ✓        | ✓        | 9            |
| Ding et al,2003              | ✓        | ✓        | ✓        | ✓        | ✓        | ✓        | ✓        | ✓        | ✓        | 9            |
| Mitsui et al,2006            | ✓        | ✓        | ✓        | ✓        | ✓        | ✓        | ✓        | ✓        | ✓        | 9            |
| Ben-Ayed et al,2015          | ✓        | ✓        | ✓        | ✓        | ✓        | ✓        | ?        | ✓        | ✓        | 8            |
| Ricco et al,2016             | ✓        | ✓        | ✓        | ✓        | ✓        | ✓        | ?        | ✓        | ✓        | 8            |
| Chen et al,2016              | ✓        | ✓        | ✓        | ✓        | ✓        | ✓        | ✓        | ✓        | ✓        | 9            |
| Knodler et al,1994           | ✓        | ✓        | ✓        | -        | ✓        | ✓        | ?        | ✓        | ✓        | 7            |
| Buti et al,1995              | ✓        | ✓        | ✓        | ✓        | ✓        | ✓        | ?        | ✓        | ✓        | 8            |
| Cengiz et al,1996            | ✓        | ✓        | ✓        | ✓        | ✓        | ✓        | ?        | ✓        | ✓        | 8            |
| Parana et al,1997            | ✓        | ✓        | ✓        | ✓        | ✓        | ✓        | ?        | ✓        | ✓        | 8            |

|                             |   |   |   |   |   |   |   |   |   |   |
|-----------------------------|---|---|---|---|---|---|---|---|---|---|
| Arinsoy et al,1998          | ✓ | ? | ✓ | - | ✓ | ✓ | ? | ✓ | ✓ | 7 |
| Mateos et al,1999           | ✓ | ? | ✓ | ✓ | ✓ | ✓ | ? | ✓ | ✓ | 7 |
| Trinta et al,2001           | ✓ | ✓ | ✓ | × | ✓ | ✓ | ? | ✓ | ✓ | 7 |
| Alavian et al, 2015         | ✓ | ✓ | ✓ | ✓ | ✓ | ✓ | ? | ✓ | ✓ | 8 |
| Halfon et al,1994           | ✓ | ✓ | ✓ | ✓ | ✓ | ✓ | ? | ✓ | ✓ | 8 |
| Kikuchi et al, 2006         | ✓ | ✓ | ✓ | ✓ | ✓ | ✓ | ✓ | ✓ | ✓ | 9 |
| Sylvan et al,1998           | ✓ | ✓ | ✓ | ✓ | ✓ | ✓ | ✓ | ✓ | ✓ | 9 |
| Taremi et al,2005           | ✓ | ✓ | ✓ | ✓ | ✓ | ✓ | ✓ | ✓ | ✓ | 9 |
| Zekavat et al,2013          | ✓ | ✓ | ✓ | ✓ | ✓ | ✓ | ✓ | ✓ | ✓ | 9 |
| Ayoola et al,2015           | ✓ | ✓ | ✓ | ✓ | ✓ | ✓ | ? | ✓ | ✓ | 8 |
| Javani et al,2015           | ✓ | ✓ | ✓ | ✓ | ✓ | ✓ | ? | ✓ | ✓ | 8 |
| Fabrizi et al,1997          | ✓ | ✓ | ✓ | ✓ | ✓ | ✓ | ✓ | ✓ | ✓ | 9 |
| Irshad et al,2002           | ✓ | ✓ | ✓ | ✓ | ✓ | ✓ | ? | ✓ | ✓ | 8 |
| Gessoni et al,1998          | ✓ | ✓ | ✓ | ✓ | ✓ | ✓ | ? | ✓ | ✓ | 8 |
| Stefanidis et al,2004       | ✓ | ✓ | ✓ | ✓ | ✓ | ✓ | ? | ✓ | ✓ | 8 |
| Mobaien et al,2013          | ✓ | ✓ | ✓ | × | ✓ | ✓ | ? | ✓ | ✓ | 7 |
| Yong et al,2014             | ✓ | ✓ | ✓ | ✓ | ✓ | ✓ | ? | ✓ | ✓ | 8 |
| Maylin et al,2012           | ✓ | ✓ | ✓ | ✓ | ✓ | ✓ | ? | ✓ | ✓ | 8 |
| Politou et al,2015          | ✓ | ✓ | ✓ | ✓ | ✓ | ✓ | ? | ✓ | ✓ | 8 |
| Kenfak-Foguena et al,2011   | ✓ | ✓ | ✓ | ✓ | ✓ | ✓ | ? | ✓ | ✓ | 8 |
| Keane et al,2012            | ✓ | ✓ | ✓ | ✓ | ✓ | ✓ | ? | ✓ | ✓ | 8 |
| Ng et al,2000               | ✓ | ? | ✓ | ✓ | ✓ | ✓ | ? | ✓ | ✓ | 7 |
| Feldt et al,2013            | ✓ | ✓ | ✓ | ✓ | ✓ | ✓ | ? | ✓ | ✓ | 8 |
| Ethakovic et al,2014        | ✓ | ✓ | ✓ | - | ✓ | ✓ | ? | ✓ | ✓ | 7 |
| Renou et al, 2010           | ✓ | ✓ | ✓ | ✓ | ✓ | ✓ | ? | ✓ | ✓ | 8 |
| Mateos-Lindemann et al,2014 | ✓ | ✓ | ✓ | ✓ | ✓ | ✓ | ? | ✓ | ✓ | 8 |
| Caron et al,2012            | ✓ | ✓ | ✓ | ✓ | ✓ | ✓ | ? | ✓ | ✓ | 8 |
| Riveiro-Barciela et al,2014 | ✓ | ? | ✓ | ✓ | ✓ | ✓ | ? | ✓ | ✓ | 7 |
| Sellier et al,2011          | ✓ | ✓ | ✓ | ✓ | ✓ | ✓ | ? | ✓ | ✓ | 8 |
| Hassing et al,2014          | ✓ | ✓ | ✓ | ✓ | ✓ | ✓ | ? | ✓ | ✓ | 8 |
| Nouhin et al,2015           | ✓ | ✓ | ✓ | ✓ | ✓ | ✓ | ✓ | ✓ | ✓ | 9 |
| Crum-Cianflone et al,2012   | ✓ | ✓ | ✓ | - | ✓ | ✓ | ✓ | ✓ | ✓ | 8 |
| Fainboim et al,1999         | ✓ | ✓ | ✓ | ✓ | ✓ | ✓ | ✓ | ✓ | ✓ | 9 |
| Zeng et al,2017             | ✓ | ✓ | ✓ | ✓ | ✓ | ✓ | ✓ | ✓ | ✓ | 9 |
| Shrestha et al,2017         | ✓ | ✓ | ✓ | ✓ | ✓ | ✓ | ✓ | ✓ | ✓ | 9 |
| Kaba et al,2011             | ✓ | ✓ | ✓ | ✓ | ✓ | ✓ | ✓ | ✓ | ✓ | 9 |
| Rivero-Juarez et al, 2015   | ✓ | ✓ | ✓ | ✓ | ✓ | ✓ | ✓ | ✓ | ✓ | 9 |
| Scotto et al,2015           | ✓ | ✓ | ✓ | ✓ | ✓ | ✓ | ✓ | ✓ | ✓ | 9 |
| Joulaei et al,2015          | ✓ | ✓ | ✓ | ✓ | ✓ | ✓ | ✓ | ✓ | ✓ | 9 |
| Pineda et al,2014           | ✓ | ✓ | ✓ | ✓ | ✓ | ✓ | ✓ | ✓ | ✓ | 9 |
| Sherman et al,2014          | ✓ | ✓ | ✓ | ✓ | ✓ | ✓ | ✓ | ✓ | ✓ | 9 |
| Vazquez-Moron et al,2019    | ✓ | ✓ | ✓ | ✓ | ✓ | ✓ | ✓ | ✓ | ✓ | 9 |
| Jardi et al,2012            | ✓ | ✓ | ✓ | ✓ | ✓ | ✓ | ✓ | ✓ | ✓ | 9 |
| Shimizu et al, 2016         | ✓ | ✓ | ✓ | ✓ | ✓ | ✓ | ✓ | ✓ | ✓ | 9 |



|                            |   |   |   |   |   |   |   |   |   |   |
|----------------------------|---|---|---|---|---|---|---|---|---|---|
| Zhou et al,2018            | ✓ | × | ✓ | ✓ | ✓ | ✓ | ? | ✓ | ✓ | 7 |
| Rivero-Juarez et al,2017   | ✓ | ✓ | ✓ | ✓ | ✓ | ✓ | ? | ✓ | ✓ | 8 |
| Ramezani et al,2013        | ✓ | ✓ | ✓ | ✓ | ✓ | ✓ | ✓ | ✓ | ✓ | 9 |
| Pischke et al,2010         | ✓ | ✓ | ✓ | ✓ | ✓ | ✓ | ? | ✓ | ✓ | 8 |
| Balayan et al,1997         | ✓ | ✓ | ✓ | ✓ | ✓ | ✓ | ? | ✓ | ✓ | 8 |
| Boon et al,2018            | ✓ | ? | ✓ | ✓ | ✓ | ✓ | ? | ✓ | ✓ | 7 |
| Ferreira et al,2018        | ✓ | ✓ | ✓ | ✓ | ✓ | ✓ | ? | ✓ | ✓ | 8 |
| Harritshoj et al,2018      | ✓ | ✓ | ✓ | ✓ | ✓ | ✓ | ? | ✓ | ✓ | 8 |
| Bura et al,2017            | ✓ | ✓ | ✓ | ✓ | ✓ | ✓ | ? | ✓ | ✓ | 8 |
| Abravanel et al,2017       | ✓ | ✓ | ✓ | ✓ | ✓ | ✓ | ? | ✓ | ✓ | 8 |
| Bezerra et al,2019         | ✓ | ✓ | ✓ | ✓ | ✓ | ✓ | ? | ✓ | ✓ | 8 |
| Madejon et al, 2009        | ✓ | ✓ | ✓ | ✓ | ✓ | ✓ | ? | ✓ | ✓ | 8 |
| Salvio et al,2018          | ✓ | ✓ | ✓ | ✓ | ✓ | ✓ | ✓ | ✓ | ✓ | 9 |
| Pischke et al,2015         | ✓ | ✓ | ✓ | ✓ | ✓ | ✓ | ✓ | ✓ | ✓ | 9 |
| Kuniholm et al,2016        | ✓ | ✓ | ✓ | ✓ | ✓ | ✓ | ✓ | ✓ | ✓ | 9 |
| Demi et al,2018            | ✓ | ✓ | × | ✓ | ✓ | ✓ | ✓ | ✓ | ✓ | 8 |
| Enayatollah et al,2018     | ✓ | ✓ | ✓ | ✓ | ✓ | ✓ | ✓ | ✓ | ✓ | 9 |
| Oladipo et al,2015         | ✓ | ✓ | ✓ | ✓ | ✓ | ✓ | ✓ | ✓ | ✓ | 9 |
| Kantala et al, 2009        | ✓ | ✓ | ✓ | ✓ | ✓ | ✓ | ? | ✓ | ✓ | 8 |
| Khuroo et al,1994          | ✓ | ? | ✓ | ✓ | ✓ | ✓ | ? | ✓ | ✓ | 7 |
| Yang et al, 2019           | ✓ | ✓ | ✓ | ✓ | ✓ | ✓ | ✓ | ✓ | ✓ | 9 |
| Pischke et al,2014         | ✓ | ✓ | ✓ | ✓ | ✓ | ✓ | ? | ✓ | ✓ | 8 |
| Psichogiou et al,1995      | ✓ | ✓ | ✓ | ✓ | ✓ | ✓ | ? | ✓ | ✓ | 8 |
| Siripanyaphinyo et al,2014 | ✓ | × | ✓ | ✓ | ✓ | ✓ | ? | ✓ | ✓ | 7 |
| Schulz et al,2016          | ✓ | ✓ | ✓ | × | ✓ | ✓ | ? | ✓ | ✓ | 7 |
| Ramalingam et al,2013      | ✓ | ✓ | ✓ | ✓ | ✓ | ✓ | ? | ✓ | ✓ | 8 |
| Divizia et al,1999         | ✓ | ✓ | ✓ | ✓ | ✓ | ✓ | ? | ✓ | ✓ | 8 |
| Al-Knawy et al,1997        | ✓ | ✓ | ✓ | ✓ | ✓ | ✓ | ? | ✓ | ✓ | 8 |
| Cacciola et al,2011        | ✓ | ✓ | ✓ | ✓ | ✓ | ✓ | ? | ✓ | ✓ | 8 |
| Bayram et al,2007          | ✓ | ✓ | ✓ | ✓ | ✓ | ✓ | ? | ✓ | ✓ | 8 |
| Chandra et al, 2014        | ✓ | ✓ | ✓ | ✓ | ✓ | ✓ | ? | ✓ | ✓ | 8 |
| Freitas et al,2016         | ✓ | ✓ | ✓ | ✓ | ✓ | ✓ | ? | ✓ | ✓ | 8 |
| Goumba et al,2011          | ✓ | ? | ✓ | × | ✓ | ✓ | ✓ | ✓ | ✓ | 7 |
| Gupta et al,2018           | ✓ | ✓ | ✓ | ✓ | ✓ | ✓ | ? | ✓ | ✓ | 8 |
| Hyams et al,1996           | ✓ | ✓ | ✓ | ✓ | ✓ | ✓ | ? | ✓ | ✓ | 8 |
| Coursaget et al,1998       | ✓ | ✓ | ✓ | ✓ | ✓ | ✓ | ? | ✓ | ✓ | 8 |
| Shrestha et al,2003        | ✓ | ✓ | ✓ | ✓ | ✓ | ✓ | ? | ✓ | ✓ | 8 |
| Mohammad et al,2007        | ✓ | ✓ | ✓ | ✓ | ✓ | ✓ | ? | ✓ | ✓ | 8 |
| Guilherme et al,2018       | ✓ | ✓ | ✓ | ✓ | ✓ | ✓ | ? | ✓ | ✓ | 8 |
| Perez-Gracia et al, 2004   | ✓ | ✓ | ✓ | ✓ | ✓ | ✓ | ? | ✓ | ✓ | 8 |
| J.-F. TSAI et al,1994      | ✓ | ✓ | ✓ | ✓ | ✓ | ✓ | ? | ✓ | ✓ | 8 |
| Tsatsralt-Od et al,2016    | ✓ | ✓ | ✓ | ✓ | ✓ | ✓ | ? | ✓ | ✓ | 8 |
| Chandra et al, 2012        | ✓ | ✓ | ✓ | × | ✓ | ✓ | ✓ | ✓ | ✓ | 8 |
| Fridmana et al,2016        | ✓ | ✓ | ✓ | ✓ | ✓ | ✓ | ✓ | ✓ | ✓ | 9 |

|                              |   |   |   |   |   |   |   |   |   |   |
|------------------------------|---|---|---|---|---|---|---|---|---|---|
| Albetkova et al,2007         | ✓ | ✓ | ✓ | ✓ | ✓ | ✓ | ? | ✓ | ✓ | 8 |
| Koot et al,2015              | ✓ | ? | ✓ | ✓ | ✓ | ✓ | ? | ✓ | ✓ | 7 |
| Kumar et al,2007             | ✓ | ✓ | ✓ | ✓ | ✓ | ✓ | ✓ | ✓ | ✓ | 9 |
| Joon et al,2015              | ✓ | ✓ | ✓ | ✓ | ✓ | ✓ | ? | ✓ | ✓ | 8 |
| Kantala et al,2017           | ✓ | ✓ | ✓ | ✓ | ✓ | ✓ | ? | ✓ | ✓ | 8 |
| Kang et al,2017              | ✓ | ✓ | ✓ | ✓ | ✓ | ✓ | ? | ✓ | ✓ | 8 |
| Meadar et al,2010            | ✓ | ✓ | ✓ | ✓ | ✓ | ✓ | ? | ✓ | ✓ | 8 |
| Engle et al, 2002            | ✓ | ✓ | ✓ | ✓ | ✓ | ✓ | ? | ✓ | ✓ | 8 |
| Meng et al,2002              | ✓ | ✓ | ✓ | ✓ | ✓ | ✓ | ? | ✓ | ✓ | 8 |
| Zheng et al,2006             | ✓ | ✓ | ✓ | ? | ✓ | ✓ | ? | ✓ | ✓ | 7 |
| Hinjoy et al,2013            | ✓ | ✓ | ✓ | ✓ | ✓ | ✓ | ? | ✓ | ✓ | 8 |
| Utsumi et al,2011            | ✓ | ✓ | ✓ | ✓ | ✓ | ✓ | ? | ✓ | ✓ | 8 |
| Silva et al,2012             | ✓ | ✓ | ✓ | ✓ | ✓ | ✓ | ? | ✓ | ✓ | 8 |
| Traore et al,2015            | ✓ | ✓ | ✓ | ✓ | ✓ | ✓ | ? | ✓ | ✓ | 8 |
| Ivanova et al,2015           | ✓ | ? | ✓ | × | ✓ | ✓ | ✓ | ✓ | ✓ | 7 |
| Caruso et al,2017            | ✓ | ✓ | ✓ | ✓ | ✓ | ✓ | ? | ✓ | ✓ | 8 |
| Masia et al, 2009            | ✓ | ✓ | ✓ | ✓ | ✓ | ✓ | ? | ✓ | ✓ | 8 |
| Mughini-Gras et al,2017      | ✓ | ✓ | ✓ | ✓ | ✓ | ✓ | ? | ✓ | ✓ | 8 |
| Vivek et al,2011             | ✓ | ✓ | ✓ | ✓ | ✓ | ✓ | ? | ✓ | ✓ | 8 |
| Lee et al,2013               | ✓ | ✓ | ✓ | ✓ | ✓ | ✓ | ? | ✓ | ✓ | 8 |
| De Sabato et al,2017         | ✓ | ✓ | ✓ | ✓ | ✓ | ✓ | ? | ✓ | ✓ | 8 |
| Zhang et al,2017             | ✓ | ✓ | ✓ | ✓ | ✓ | ✓ | ? | ✓ | ✓ | 8 |
| Yu et al,2013                | ✓ | ✓ | ✓ | ✓ | ✓ | ✓ | ? | ✓ | ✓ | 8 |
| Chaussade et al,2013         | ✓ | ✓ | ✓ | ✓ | ✓ | ✓ | ? | ✓ | ✓ | 8 |
| Widasari 2013                | ✓ | ✓ | ✓ | ✓ | ✓ | ✓ | ? | ✓ | ✓ | 8 |
| Drobeniuc et al,2001         | ✓ | ✓ | ✓ | ✓ | ✓ | ✓ | ? | ✓ | ✓ | 8 |
| Bouwknegt et al,2008         | ✓ | ✓ | ✓ | ✓ | ✓ | ✓ | ? | ✓ | ✓ | 8 |
| Galiana et al,2008           | ✓ | ✓ | ✓ | ✓ | ✓ | ✓ | ? | ✓ | ✓ | 8 |
| Olsen et al,2006             | ✓ | ✓ | ✓ | ✓ | ✓ | ✓ | ? | ✓ | ✓ | 8 |
| Withers et al,2002           | ✓ | ✓ | ✓ | ? | ✓ | ✓ | ? | ✓ | ✓ | 7 |
| Lucarelli et al, 2016        | ✓ | ✓ | ✓ | ✓ | ✓ | ✓ | ? | ✓ | ✓ | 8 |
| Verhoef et al,2012           | ✓ | ✓ | ✓ | ✓ | ✓ | ✓ | ? | ✓ | ✓ | 8 |
| Lafeber et al, 2017          | ✓ | ✓ | ✓ | ✓ | ✓ | ✓ | ? | ✓ | ✓ | 8 |
| Love et al,2018              | ✓ | ✓ | ✓ | ✓ | ✓ | ✓ | ✓ | ✓ | ✓ | 9 |
| Lange et al,2017             | ✓ | ✓ | ✓ | ✓ | ✓ | ✓ | ✓ | ✓ | ✓ | 9 |
| Liang et al, 2014            | ✓ | ✓ | ✓ | ✓ | ✓ | ✓ | ✓ | ✓ | ✓ | 9 |
| Krumbholz et al,2012         | ✓ | ✓ | ✓ | ✓ | ✓ | ✓ | ✓ | ✓ | ✓ | 9 |
| Tritz et al,2018             | ✓ | ✓ | ✓ | ✓ | ✓ | ✓ | ? | ✓ | ✓ | 8 |
| Krumbholz et al,2014         | ✓ | ✓ | ✓ | ✓ | ✓ | ✓ | ? | ✓ | ✓ | 8 |
| Tabibi et al,2013            | ✓ | ✓ | ✓ | ✓ | ✓ | ✓ | ? | ✓ | ✓ | 8 |
| Alvarado-Esquivel et al,2014 | ✓ | ✓ | ✓ | ✓ | ✓ | ✓ | ? | ✓ | ✓ | 8 |
| Cong et al,2014              | ✓ | ? | ✓ | × | ✓ | ✓ | ? | ✓ | ✓ | 6 |
| Abebe et al,2017             | ✓ | ✓ | ✓ | ✓ | ✓ | ✓ | ? | ✓ | ✓ | 8 |

|                            |   |   |   |   |   |   |   |   |   |   |
|----------------------------|---|---|---|---|---|---|---|---|---|---|
| Rey et al,1997             | ✓ | ✓ | ✓ | ✓ | ✓ | ✓ | ? | ✓ | ✓ | 8 |
| Martinez et al, 2014       | ✓ | ✓ | ✓ | ✓ | ✓ | ✓ | ? | ✓ | ✓ | 8 |
| Munne et al,2014           | ✓ | ✓ | ✓ | ✓ | ✓ | ✓ | ? | ✓ | ✓ | 8 |
| Moaven et al,1995          | ✓ | ✓ | ✓ | ✓ | ✓ | ✓ | ? | ✓ | ✓ | 8 |
| Lagler et al,2014          | ✓ | ✓ | ✓ | ✓ | ✓ | ✓ | ? | ✓ | ✓ | 8 |
| Fischer et al, 2015        | ✓ | ✓ | ✓ | ✓ | ✓ | ✓ | ? | ✓ | ✓ | 8 |
| Rahman et al,2014          | ✓ | ✓ | ✓ | ✓ | ✓ | ✓ | ? | ✓ | ✓ | 8 |
| Labrique et al,2009        | ✓ | ✓ | ✓ | ✓ | ✓ | ✓ | ? | ✓ | ✓ | 8 |
| Sheikh et al, 2002         | ✓ | ✓ | ✓ | ✓ | ✓ | ✓ | ? | ✓ | ✓ | 8 |
| De Paschale et al, 2016    | ✓ | ✓ | ✓ | ✓ | ✓ | ✓ | ? | ✓ | ✓ | 8 |
| Dell'Amico et al,2011      | ✓ | ? | ✓ | ✓ | ✓ | ✓ | ? | ✓ | ✓ | 7 |
| Konomi et al,1999          | ✓ | ✓ | ✓ | × | ✓ | ✓ | ? | ✓ | ✓ | 7 |
| Gandolfo et al,2003        | ✓ | ✓ | ✓ | ✓ | ✓ | ✓ | ? | ✓ | ✓ | 8 |
| Bartoloni et al,1999       | ✓ | ✓ | ✓ | ✓ | ✓ | ✓ | ? | ✓ | ✓ | 8 |
| Leon et al, 1999           | ✓ | ✓ | ✓ | ✓ | ✓ | ✓ | ? | ✓ | ✓ | 8 |
| de Paula et al,2001        | ✓ | ✓ | ✓ | ✓ | ✓ | ✓ | ? | ✓ | ✓ | 8 |
| Passos-Castilho et al,2016 | ✓ | ✓ | ✓ | ✓ | ✓ | ✓ | ? | ✓ | ✓ | 8 |
| Goncales et al,2000        | ✓ | ✓ | ✓ | ✓ | ✓ | ✓ | ? | ✓ | ✓ | 8 |
| Vitral et al,2014          | ✓ | ✓ | ✓ | ✓ | ✓ | ✓ | ✓ | ✓ | ✓ | 9 |
| Santos et al,2002          | ✓ | ✓ | ✓ | ✓ | ✓ | ✓ | ✓ | ✓ | ✓ | 9 |
| Hardtke et al,2018         | ✓ | ✓ | ✓ | ✓ | ✓ | ✓ | ✓ | ✓ | ✓ | 9 |
| Martins et al,2014         | ✓ | ✓ | ✓ | ? | ✓ | ✓ | ? | ✓ | ✓ | 7 |
| Bortoliero et al,2006      | ✓ | ✓ | ✓ | ✓ | ✓ | ✓ | ✓ | ✓ | ✓ | 9 |
| Pavel et al,2014           | ✓ | ✓ | ✓ | ✓ | ✓ | ✓ | ? | ✓ | ✓ | 8 |
| Traore et al,2012          | ✓ | ✓ | ✓ | ✓ | ✓ | ✓ | ✓ | ✓ | ✓ | 9 |
| Aubry et al,1997           | ✓ | ✓ | ✓ | ✓ | ✓ | ✓ | ? | ✓ | ✓ | 8 |
| Fearon et al, 2017         | ✓ | ✓ | ✓ | ✓ | ✓ | ✓ | ✓ | ✓ | ✓ | 9 |
| Nouhin et al,2016          | ✓ | ✓ | ✓ | ✓ | ✓ | ✓ | ✓ | ✓ | ✓ | 9 |
| Nouhin et al,2018          | ✓ | ✓ | ✓ | ? | ✓ | ✓ | ✓ | ✓ | ✓ | 8 |
| Yamada et al,2015          | ✓ | ✓ | ✓ | ✓ | ✓ | ✓ | ? | ✓ | ✓ | 8 |
| Wong et al,2004            | ✓ | ✓ | ✓ | ✓ | ✓ | ✓ | ? | ✓ | ✓ | 8 |
| Zhuang et al,2014          | ✓ | ✓ | ✓ | ✓ | ✓ | ✓ | ? | ✓ | ✓ | 9 |
| Wang et al,2017            | ✓ | ✓ | ✓ | ✓ | ✓ | ✓ | ? | ✓ | ✓ | 9 |
| Chiu et al,2013            | ✓ | ✓ | ✓ | ✓ | ✓ | ✓ | ? | ✓ | ✓ | 9 |
| Chang et al,2009           | ✓ | ? | ✓ | ✓ | ✓ | ✓ | ? | ✓ | ✓ | 7 |
| Chen et al,2019            | ✓ | ✓ | ✓ | ✓ | ✓ | ✓ | ? | ✓ | ✓ | 8 |
| Guo et al,2010             | ✓ | ✓ | ✓ | ✓ | ✓ | ✓ | ? | ✓ | ✓ | 8 |
| Yang et al,2014            | ✓ | ✓ | ✓ | ✓ | ✓ | ✓ | ? | ✓ | ✓ | 8 |
| Peng et al,1995            | ✓ | ✓ | ✓ | ✓ | ✓ | ✓ | ✓ | ✓ | ✓ | 9 |
| Jia et al,2014             | ✓ | ✓ | ✓ | ✓ | ✓ | ✓ | ✓ | ✓ | ✓ | 9 |
| Li et al,2011              | ✓ | ✓ | ✓ | ✓ | ✓ | ✓ | ✓ | ✓ | ✓ | 9 |
| Li et al,2014              | ✓ | ✓ | ✓ | ✓ | ✓ | ✓ | ? | ✓ | ✓ | 8 |
| Lee et al,1994             | ✓ | ✓ | ✓ | ✓ | ✓ | ✓ | ? | ✓ | ✓ | 8 |
| Liu et al,2019             | ✓ | ✓ | ✓ | ✓ | ✓ | ✓ | ? | ✓ | ✓ | 8 |



|                        |   |   |   |   |   |   |   |   |   |   |
|------------------------|---|---|---|---|---|---|---|---|---|---|
| Cui et al,2016         | ✓ | ✓ | ✓ | ✓ | ✓ | ✓ | ? | ✓ | ✓ | 8 |
| Zeng et al, 2017       | ✓ | ✓ | ✓ | ✓ | ✓ | ✓ | ? | ✓ | ✓ | 8 |
| Cheng et al,2007       | ✓ | ✓ | ✓ | ✓ | ✓ | ✓ | ? | ✓ | ✓ | 8 |
| Meng et al,2015        | ✓ | ✓ | ✓ | - | ✓ | ✓ | ? | ✓ | ✓ | 7 |
| Toole et al,2006       | ✓ | ✓ | ✓ | ✓ | ✓ | ✓ | ? | ✓ | ✓ | 8 |
| Dong et al,2007        | ✓ | ✓ | ✓ | ✓ | ✓ | ✓ | ? | ✓ | ✓ | 8 |
| Geng et al,2011        | ✓ | ✓ | ✓ | ✓ | ✓ | ✓ | ? | ✓ | ✓ | 8 |
| Zhu et al,2008         | ✓ | ✓ | ✓ | ✓ | ✓ | ✓ | ✓ | ✓ | ✓ | 9 |
| Zhu et al, 2014        | ✓ | ✓ | ✓ | - | ✓ | ✓ | ✓ | ✓ | ✓ | 8 |
| Ren et al,2014         | ✓ | ✓ | ✓ | ✓ | ✓ | ✓ | ✓ | ✓ | ✓ | 9 |
| Cai et al,2017         | ✓ | ✓ | ✓ | ✓ | ✓ | ✓ | ✓ | ✓ | ✓ | 9 |
| Feng et al,2018        | ✓ | ✓ | ✓ | ✓ | ✓ | ✓ | ? | ✓ | ✓ | 8 |
| Chan et al,2017        | ✓ | ✓ | ✓ | ✓ | ✓ | ✓ | ✓ | ✓ | ✓ | 9 |
| Chen et al,2012        | ✓ | ✓ | ✓ | ✓ | ✓ | ✓ | ✓ | ✓ | ✓ | 9 |
| Ma et al,2006          | ✓ | ✓ | ✓ | ✓ | ✓ | ✓ | ? | ✓ | ✓ | 8 |
| Li et al,2006          | ✓ | ✓ | ✓ | ✓ | ✓ | ✓ | ? | ✓ | ✓ | 8 |
| Lu et al, 2009         | ✓ | ✓ | ✓ | ✓ | ✓ | ✓ | ? | ✓ | ✓ | 8 |
| Li et al,2019          | ✓ | ✓ | ✓ | ✓ | ✓ | ✓ | ✓ | ✓ | ✓ | 9 |
| Zhilian et al,2018     | ✓ | ✓ | ✓ | ✓ | ✓ | ✓ | ✓ | ✓ | ✓ | 9 |
| Huang et al, 2013      | ✓ | ✓ | ✓ | ✓ | ✓ | ✓ | ✓ | ✓ | ✓ | 9 |
| Ibarra et al,1994      | ✓ | ✓ | ✓ | ✓ | ✓ | ✓ | ✓ | ✓ | ✓ | 9 |
| Strakova et al,2014    | ✓ | ✓ | ✓ | ✓ | ✓ | ✓ | ? | ✓ | ✓ | 8 |
| Quintana et al,2005    | ✓ | ✓ | ✓ | - | ✓ | ✓ | ? | ✓ | ✓ | 7 |
| Villalba et al,2010    | ✓ | ✓ | ✓ | ✓ | ✓ | ✓ | ? | ✓ | ✓ | 8 |
| Lemos et al,2000       | ✓ | ✓ | ✓ | ✓ | ✓ | ✓ | ? | ✓ | ✓ | 8 |
| Christensen et al,2008 | ✓ | ✓ | ✓ | ✓ | ✓ | ✓ | ? | ✓ | ✓ | 8 |
| Langer et al,1997      | ✓ | ✓ | ✓ | ✓ | ✓ | ✓ | ? | ✓ | ✓ | 8 |
| Dimeglio et al, 2018   | ✓ | ? | ✓ | - | ✓ | ✓ | ? | ✓ | ✓ | 6 |
| Boutrouille et al,2007 | ✓ | ? | ✓ | ✓ | ✓ | ✓ | ? | ✓ | ✓ | 7 |
| Mansuy et al,2016      | ✓ | ✓ | ✓ | ✓ | ✓ | ✓ | ? | ✓ | ✓ | 8 |
| Mansuy et al,2015      | ✓ | ✓ | ✓ | ✓ | ✓ | ✓ | ✓ | ✓ | ✓ | 9 |
| Kaba et al,2010        | ✓ | ✓ | ✓ | ✓ | ✓ | ✓ | ✓ | ✓ | ✓ | 9 |
| Takahashi et al,2004   | ✓ | ✓ | ✓ | ✓ | ✓ | ✓ | ✓ | ✓ | ✓ | 9 |
| Takeda et al,2010      | ✓ | ✓ | ✓ | ✓ | ✓ | ✓ | ✓ | ✓ | ✓ | 9 |
| Sakata et al,2008      | ✓ | ✓ | ✓ | ✓ | ✓ | ✓ | ✓ | ✓ | ✓ | 9 |
| Toyoda et al,2008      | ✓ | ✓ | ✓ | ✓ | ✓ | ✓ | ✓ | ✓ | ✓ | 9 |
| Mitsui et al,2005      | ✓ | ✓ | ✓ | ✓ | ✓ | ✓ | ✓ | ✓ | ✓ | 9 |
| Goto et al,2006        | ✓ | ✓ | ✓ | ✓ | ✓ | ✓ | ? | ✓ | ✓ | 8 |
| Fukuda et al, 2007     | ✓ | ✓ | ✓ | ✓ | ✓ | ✓ | ? | ✓ | ✓ | 8 |
| Gambel et al,1998      | ✓ | ✓ | ✓ | ✓ | ✓ | ✓ | ? | ✓ | ✓ | 8 |
| Kamel et al,1995       | ✓ | ✓ | ✓ | ✓ | ✓ | ✓ | ? | ✓ | ✓ | 8 |
| Aboulata et al, 2005   | ✓ | ✓ | ✓ | ? | ✓ | ✓ | ? | ✓ | ✓ | 7 |
| Hasan et al,2016       | ✓ | ✓ | ✓ | ✓ | ✓ | ✓ | ? | ✓ | ✓ | 8 |
| Fix et al,2000         | ✓ | ✓ | ✓ | ✓ | ✓ | ✓ | ? | ✓ | ✓ | 8 |
| Stoszek et al,2006     | ✓ | ✓ | ✓ | ✓ | ✓ | ✓ | ? | ✓ | ✓ | 8 |
| Gad et al, 2011        | ✓ | ✓ | ✓ | ✓ | ✓ | ✓ | ? | ✓ | ✓ | 8 |

|                           |   |   |   |   |   |   |   |   |   |   |
|---------------------------|---|---|---|---|---|---|---|---|---|---|
| Wenzel et al,2014         | ✓ | ✓ | ✓ | ✓ | ✓ | ✓ | ✓ | ✓ | ✓ | 9 |
| Juhl et al,2018           | ✓ | ✓ | ✓ | ✓ | ✓ | ✓ | ✓ | ✓ | ✓ | 9 |
| Mahrt et al,2018          | ✓ | ? | ✓ | ✓ | ✓ | ✓ | ✓ | ✓ | ✓ | 8 |
| Jablonka et al,2015       | ✓ | ✓ | ✓ | ✓ | ✓ | ✓ | ✓ | ✓ | ✓ | 9 |
| Schielke et al,2015       | ✓ | ✓ | ✓ | ✓ | ✓ | ✓ | ✓ | ✓ | ✓ | 9 |
| Dremsek et al, 2012       | ✓ | ✓ | ✓ | ✓ | ✓ | ✓ | ✓ | ✓ | ✓ | 9 |
| Meldal et al,2013         | ✓ | ✓ | ✓ | ✓ | ✓ | ✓ | ✓ | ✓ | ✓ | 9 |
| Adjei et al,2009          | ✓ | ✓ | ✓ | ✓ | ✓ | ✓ | ✓ | ✓ | ✓ | 9 |
| Talarmin et al,1997       | ✓ | ✓ | ✓ | ✓ | ✓ | ✓ | ✓ | ✓ | ✓ | 9 |
| Tripathy et al,2019       | ✓ | ✓ | ✓ | ? | ✓ | ✓ | ✓ | ✓ | ✓ | 8 |
| Vivek et al,2010          | ✓ | ✓ | ✓ | ✓ | ✓ | ✓ | ✓ | ✓ | ✓ | 9 |
| Kotwal et al,2014         | ✓ | ✓ | ✓ | ✓ | ✓ | ✓ | ✓ | ✓ | ✓ | 9 |
| Katiyar et al, 2018       | ✓ | ✓ | ✓ | ✓ | ✓ | ✓ | ✓ | ✓ | ✓ | 9 |
| Pathak et al,2017         | ✓ | ✓ | ✓ | ✓ | ✓ | ✓ | ✓ | ✓ | ✓ | 9 |
| Mathur et al,2001         | ✓ | ? | ✓ | ✓ | ✓ | ✓ | ✓ | ✓ | ✓ | 8 |
| Achwan et al,2007         | ✓ | ✓ | ✓ | ✓ | ✓ | ✓ | ✓ | ✓ | ✓ | 9 |
| Ehteram et al,2013        | ✓ | ✓ | ✓ | ✓ | ✓ | ✓ | ✓ | ✓ | ✓ | 9 |
| Farshadpour et al,2015    | ✓ | ✓ | ✓ | × | ✓ | ✓ | ✓ | ✓ | ✓ | 8 |
| Assarehzadegan et al,2008 | ✓ | ✓ | ✓ | ✓ | ✓ | ✓ | ? | ✓ | ✓ | 8 |
| Mohebbi et al,2012        | ✓ | ? | ✓ | ✓ | ✓ | ✓ | ? | ✓ | ✓ | 7 |
| Sotoodeh et al,2013       | ✓ | ✓ | ✓ | ✓ | ✓ | ✓ | ? | ✓ | ✓ | 8 |
| Ataei et al, 2009         | ✓ | ✓ | ✓ | ✓ | ✓ | ✓ | ? | ✓ | ✓ | 8 |
| Hesamizadeh et al,2016    | ✓ | ✓ | ✓ | ✓ | ✓ | ✓ | ? | ✓ | ✓ | 8 |
| Sepanlou et al,2010       | ✓ | ? | ✓ | ✓ | ✓ | ✓ | ? | ✓ | ✓ | 7 |
| Raoofi et al, 2012        | ✓ | ? | ✓ | ✓ | ✓ | ✓ | ? | ✓ | ✓ | 7 |
| Jahanbakhsh et al,2017    | ✓ | ? | ✓ | ✓ | × | ✓ | ? | ✓ | ✓ | 6 |
| Saffar et al,2009         | ✓ | ✓ | ✓ | ✓ | ✓ | ✓ | ? | ✓ | ✓ | 8 |
| Hickey et al,2016         | ✓ | ✓ | ✓ | ✓ | ✓ | ✓ | ✓ | ✓ | ✓ | 9 |
| O'Riordan et al,2016      | ✓ | ✓ | ✓ | ✓ | ✓ | ✓ | ? | ✓ | ✓ | 8 |
| Karenyi et al, 1995       | ✓ | ✓ | ✓ | ✓ | ✓ | ✓ | ? | ✓ | ✓ | 8 |
| Lachish et al, 2013       | ✓ | ✓ | ✓ | ✓ | ✓ | ✓ | ? | ✓ | ✓ | 8 |
| Mor et al, 2015           | ✓ | ✓ | ✓ | ✓ | ✓ | ✓ | ? | ✓ | ✓ | 8 |
| Spada et al,2018          | ✓ | ✓ | ✓ | ✓ | ✓ | ✓ | ? | ✓ | ✓ | 8 |
| Gessoni et al, 1996       | ✓ | ✓ | ✓ | ✓ | ✓ | ✓ | ? | ✓ | ✓ | 8 |
| Puttini et al,2015        | ✓ | ✓ | ✓ | ✓ | ✓ | ✓ | ? | ✓ | ✓ | 8 |
| Pavia et al,1998          | ✓ | ✓ | ✓ | ✓ | ✓ | ✓ | ? | ✓ | ✓ | 8 |
| Zuin et al, 2017          | ✓ | ✓ | ✓ | ✓ | ✓ | ✓ | ? | ✓ | ✓ | 8 |
| Scotto et al, 2012        | ✓ | ✓ | ✓ | ✓ | ✓ | ✓ | ✓ | ✓ | ✓ | 9 |
| Marcantonio et al,2019    | ✓ | ✓ | ✓ | ✓ | ? | ✓ | ✓ | ✓ | ✓ | 8 |
| Lanini et al,2015         | ✓ | ✓ | ✓ | ✓ | ✓ | ✓ | ? | ✓ | ✓ | 8 |
| Rapicetta et al,1999      | ✓ | ✓ | ✓ | ✓ | ✓ | ✓ | ? | ✓ | ✓ | 8 |
| Alecci et al,1997         | ✓ | ✓ | ✓ | ✓ | ✓ | ✓ | ? | ✓ | ✓ | 8 |
| Obaidat et al,2018        | ✓ | ✓ | ✓ | ✓ | ✓ | ✓ | ? | ✓ | ✓ | 8 |
| Cainelli et al, 2018      | ✓ | ✓ | ✓ | ✓ | ✓ | ✓ | ? | ✓ | ✓ | 8 |
| Ahn et al,2005            | ✓ | ✓ | ✓ | ✓ | ✓ | ✓ | ? | ✓ | ✓ | 8 |

|                              |   |   |   |   |   |   |   |   |   |   |
|------------------------------|---|---|---|---|---|---|---|---|---|---|
| Yoon et al,2014              | ✓ | ✓ | ✓ | ✓ | ✓ | ✓ | ? | ✓ | ✓ | 8 |
| Yun et al, 2011              | ✓ | ✓ | ✓ | ✓ | ✓ | ✓ | ? | ✓ | ✓ | 8 |
| Chironna et al,2001          | ✓ | ✓ | ✓ | ✓ | ✓ | ✓ | ? | ✓ | ✓ | 8 |
| Khounvisith et al,2018       | ✓ | ✓ | ✓ | ✓ | ✓ | ✓ | ✓ | ✓ | ✓ | 9 |
| Alvarez-Munoz et al,1999     | ✓ | ✓ | ✓ | ✓ | ✓ | ✓ | ✓ | ✓ | ✓ | 9 |
| Baptista-Gonzalez et al,2017 | ✓ | ✓ | ✓ | ✓ | ✓ | ✓ | ✓ | ✓ | ✓ | 9 |
| Alvarado-Esquivel et al,2015 | ✓ | ✓ | ✓ | ✓ | ✓ | ✓ | ✓ | ✓ | ✓ | 9 |
| Davaalkham et al,2009        | ✓ | ✓ | ✓ | ✓ | ✓ | ✓ | ✓ | ✓ | ✓ | 9 |
| Tsatsralt-Od et al,2007      | ✓ | ✓ | ✓ | - | ✓ | ✓ | ✓ | ✓ | ✓ | 9 |
| Terzic et al, 2015           | ✓ | ✓ | ✓ | ✓ | ✓ | ✓ | ✓ | ✓ | ✓ | 9 |
| Taha et al,2015              | ✓ | ✓ | ✓ | ✓ | ✓ | ✓ | ✓ | ✓ | ✓ | 9 |
| Halliday et al,2014          | ✓ | ✓ | ✓ | ✓ | ✓ | ✓ | ? | ✓ | ✓ | 8 |
| Abe et al, 2006              | ✓ | ✓ | ✓ | ✓ | ✓ | ✓ | ? | ✓ | ✓ | 8 |
| Baylis et al,2012            | ✓ | ✓ | ✓ | ✓ | ✓ | ✓ | ? | ✓ | ✓ | 8 |
| Minuk et al, 2007            | ✓ | ✓ | ✓ | ✓ | ✓ | ✓ | ? | ✓ | ✓ | 8 |
| Izopet et al,2015            | ✓ | ✓ | ✓ | ✓ | ✓ | ✓ | ? | ✓ | ✓ | 8 |
| Schreuder et al, 2016        | ✓ | ✓ | ✓ | ✓ | ✓ | ✓ | ? | ✓ | ✓ | 8 |
| Clayson et al,1997           | ✓ | ✓ | ✓ | ✓ | ✓ | ✓ | ? | ✓ | ✓ | 8 |
| Shrestha et al,2016          | ✓ | ✓ | ✓ | ✓ | ✓ | ✓ | ? | ✓ | ✓ | 8 |
| Mooij et al,2018             | ✓ | ✓ | ✓ | ✓ | ✓ | ✓ | ? | ✓ | ✓ | 8 |
| Slot et al, 2013             | ✓ | ✓ | ✓ | ✓ | ✓ | ✓ | ✓ | ✓ | ✓ | 9 |
| Sadik et al,2016             | ✓ | ✓ | ✓ | × | ✓ | ✓ | ✓ | ✓ | ✓ | 8 |
| Hogema et al,2016            | ✓ | ✓ | ✓ | ✓ | ✓ | ✓ | ✓ | ✓ | ✓ | 9 |
| Alberts et al, 2018          | ✓ | ? | ✓ | ✓ | ✓ | ✓ | ✓ | ✓ | ✓ | 8 |
| Hewitt et al,2018            | ✓ | ✓ | ✓ | ✓ | ✓ | ✓ | ✓ | ✓ | ✓ | 9 |
| Ekanem et al,2015            | ✓ | ✓ | ✓ | ✓ | ✓ | ✓ | ? | ✓ | ✓ | 8 |
| O. A Adesina et al,2009      | ✓ | ? | ✓ | ✓ | ✓ | ✓ | ? | ✓ | ✓ | 7 |
| Perez 1996                   | ✓ | ✓ | ✓ | ✓ | ✓ | ✓ | ? | ✓ | ✓ | 8 |
| Grabarczyk et al,2018        | ✓ | ✓ | ✓ | ✓ | ✓ | ✓ | ? | ✓ | ✓ | 8 |
| Korzeniewski et al,2018      | ✓ | ✓ | ✓ | ✓ | ✓ | ✓ | ? | ✓ | ✓ | 8 |
| Sadkowska-Todys et al,2015   | ✓ | ✓ | ✓ | ✓ | ✓ | ✓ | ? | ✓ | ✓ | 8 |
| Bura et al,2018              | ✓ | ✓ | ✓ | ✓ | ✓ | ✓ | ? | ✓ | ✓ | 8 |
| Nascimento et al,2018        | ✓ | ✓ | ✓ | ✓ | ✓ | ✓ | ? | ✓ | ✓ | 8 |
| Teixeira et al,2017          | ✓ | ✓ | ✓ | ✓ | ✓ | ✓ | ? | ✓ | ✓ | 8 |
| Oliveira et al,2017          | ✓ | ✓ | ✓ | ✓ | ✓ | ✓ | ? | ✓ | ✓ | 8 |
| Nasrallah et al, 2017        | ✓ | ✓ | ✓ | ✓ | ✓ | ✓ | ? | ✓ | ✓ | 8 |
| Abe et al,2004               | ✓ | ✓ | ✓ | ✓ | ✓ | ✓ | ? | ✓ | ✓ | 8 |
| Anita et al,2014             | ✓ | ✓ | ✓ | ✓ | ✓ | ✓ | ? | ✓ | ✓ | 8 |
| Arif et al,1994              | ✓ | ✓ | ✓ | ✓ | ✓ | ✓ | ? | ✓ | ✓ | 8 |
| Johargy et al, 2013          | ✓ | ? | ✓ | ✓ | ✓ | ✓ | ? | ✓ | ✓ | 7 |
| Abdelaal et al,1998          | ✓ | ✓ | ✓ | ✓ | ✓ | ✓ | ? | ✓ | ✓ | 8 |
| Petrovic et al,2014          | ✓ | ✓ | ✓ | ✓ | ✓ | ✓ | ? | ✓ | ✓ | 8 |



|                           |   |   |   |   |   |   |   |   |   |   |
|---------------------------|---|---|---|---|---|---|---|---|---|---|
| Chow et al,1997           | ✓ | ✓ | ✓ | ✓ | ✓ | ✓ | ? | ✓ | ✓ | 8 |
| Grabow et al, 1994        | ✓ | ✓ | ✓ | ✓ | ✓ | ✓ | ? | ✓ | ✓ | 8 |
| Madden et al,2016         | ✓ | ✓ | ✓ | ✓ | ✓ | ✓ | ? | ✓ | ✓ | 8 |
| Lopes et al,2017          | ✓ | ✓ | ✓ | ✓ | ✓ | ✓ | ? | ✓ | ✓ | 8 |
| Azman et al,2017          | ✓ | ✓ | ✓ | - | ✓ | ✓ | ? | ✓ | ✓ | 7 |
| Fogeda et al,2012         | ✓ | ✓ | ✓ | ✓ | ✓ | ✓ | ? | ✓ | ✓ | 8 |
| Bernal 1995               | ✓ | ✓ | ✓ | ✓ | ✓ | ✓ | ? | ✓ | ✓ | 8 |
| Mateos et al,1998         | ✓ | ✓ | ✓ | ✓ | ✓ | ✓ | ? | ✓ | ✓ | 8 |
| Buti et al,2013 2008      | ✓ | ✓ | ✓ | ? | ✓ | ✓ | ? | ✓ | ✓ | 7 |
| Buti et al,2006           | ✓ | ✓ | ✓ | ✓ | ✓ | ✓ | ? | ✓ | ✓ | 8 |
| Sauleda et al, 2015       | ✓ | ✓ | ✓ | ✓ | ✓ | ✓ | ✓ | ✓ | ✓ | 9 |
| Kaufmann et al,2011       | ✓ | ✓ | ✓ | ✓ | ✓ | ✓ | ✓ | ✓ | ✓ | 9 |
| Lavanchy et al,1994       | ✓ | ✓ | ✓ | - | ✓ | ✓ | ✓ | ✓ | ✓ | 8 |
| Jeggli et al,2004         | ✓ | ✓ | ✓ | ✓ | ✓ | ✓ | ? | ✓ | ✓ | 8 |
| Niederhauser et al,2018   | ✓ | ? | ✓ | ✓ | ✓ | ✓ | ✓ | ✓ | ✓ | 8 |
| Poovorawan et al,1996     | ✓ | ✓ | ✓ | ✓ | ✓ | ✓ | ✓ | ✓ | ✓ | 9 |
| Intharasonkroh et al,2019 | ✓ | ✓ | ✓ | ✓ | ✓ | ✓ | ✓ | ✓ | ✓ | 9 |
| Pilakasiri et al,2009     | ✓ | ✓ | ✓ | ✓ | ✓ | ✓ | ✓ | ✓ | ✓ | 9 |
| Mohanavalli et al,2003    | ✓ | ✓ | ✓ | ✓ | ✓ | ✓ | ✓ | ✓ | ✓ | 9 |
| Houcine et al,2012        | ✓ | ? | ✓ | ✓ | ✓ | ✓ | ? | ✓ | ✓ | 7 |
| Colak et al,2002          | ✓ | ✓ | ✓ | ✓ | ✓ | ✓ | ? | ✓ | ✓ | 8 |
| Bayhan et al,2016         | ✓ | ✓ | ✓ | ✓ | ✓ | ✓ | ? | ✓ | ✓ | 8 |
| Atabek et al,2004         | ✓ | ✓ | ✓ | ✓ | ✓ | ✓ | ? | ✓ | ✓ | 8 |
| Kaya et al,2008           | ✓ | ✓ | ✓ | ✓ | ✓ | ✓ | ? | ✓ | ✓ | 8 |
| Sencan et al,2004         | ✓ | ✓ | ✓ | ✓ | ✓ | ✓ | ? | ✓ | ✓ | 8 |
| Sidal et al,2001          | ✓ | ✓ | ✓ | ✓ | ✓ | ✓ | ? | ✓ | ✓ | 8 |
| Dilek et al,2003          | ✓ | ✓ | ✓ | ✓ | ✓ | ✓ | ? | ✓ | ✓ | 8 |
| Nural et al,2013          | ✓ | ✓ | ✓ | ✓ | ✓ | ✓ | ? | ✓ | ✓ | 8 |
| Oncu et al,2006           | ✓ | ✓ | ✓ | ✓ | ✓ | ✓ | ✓ | ✓ | ✓ | 9 |
| Cevrioglu et al,2004      | ✓ | ✓ | ✓ | ✓ | ✓ | ✓ | ✓ | ✓ | ✓ | 9 |
| Miller et al,1998         | ✓ | ✓ | ✓ | ✓ | ✓ | ✓ | ✓ | ✓ | ✓ | 9 |
| Cangin et al, 2019        | ✓ | ✓ | ✓ | ✓ | ✓ | ✓ | ✓ | ✓ | ✓ | 9 |
| Karenyi et al,1999        | ✓ | ✓ | ✓ | × | ✓ | ✓ | ✓ | ✓ | ✓ | 8 |
| Kuniholm et al,2009       | ✓ | ✓ | ✓ | ✓ | ✓ | ✓ | ✓ | ✓ | ✓ | 9 |
| Eick et al,2010           | ✓ | ✓ | ✓ | ✓ | ✓ | ✓ | ✓ | ✓ | ✓ | 9 |
| Ditah et al,2014          | ✓ | ✓ | ✓ | ✓ | ✓ | ✓ | ✓ | ✓ | ✓ | 9 |
| Zhang et al,2015          | ✓ | ✓ | ✓ | ✓ | ✓ | ✓ | ✓ | ✓ | ✓ | 9 |
| Kyvernitakis 2015         | ✓ | ✓ | ✓ | ✓ | ✓ | ✓ | ? | ✓ | ✓ | 8 |
| Xu et al,2013             | ✓ | ✓ | ✓ | ✓ | ✓ | ✓ | ? | ✓ | ✓ | 8 |
| Stramer et al,2016        | ✓ | ✓ | ✓ | ✓ | ✓ | ✓ | ? | ✓ | ✓ | 8 |
| Teshale et al, 2015       | ✓ | ✓ | ✓ | ✓ | ✓ | ✓ | ? | ✓ | ✓ | 8 |
| Cleland et al, 2013       | ✓ | ✓ | ✓ | ✓ | ✓ | ✓ | ? | ✓ | ✓ | 8 |
| Thom et al,2018           | ✓ | ✓ | ✓ | ✓ | ✓ | ✓ | ? | ✓ | ✓ | 8 |
| Dalton et al,2017         | ✓ | ✓ | ✓ | ✓ | ✓ | ✓ | ? | ✓ | ✓ | 8 |
| Harvala et al,2019        | ✓ | ✓ | ✓ | ✓ | ✓ | ✓ | ? | ✓ | ✓ | 8 |
| Ijaz et al,2009           | ✓ | ✓ | ✓ | ✓ | ✓ | ✓ | ? | ✓ | ✓ | 8 |

|                             |       |   |      |   |   |             |   |                 |   |   |
|-----------------------------|-------|---|------|---|---|-------------|---|-----------------|---|---|
| Pujol et al,1994            | ✓     | ✓ | ✓    | ✓ | ✓ | ✓           | ✓ | ✓               | ✓ | 9 |
| Corwin et al,1996           | ✓     | ✓ | ✓    | ✓ | ✓ | ✓           | ✓ | ✓               | ✓ | 9 |
| Hau et al,1999              | ✓     | ✓ | ✓    | ✓ | ✓ | ✓           | ✓ | ✓               | ✓ | 9 |
| Bawazir et al, 2010         | ✓     | ✓ | ✓    | ✓ | ✓ | ✓           | ? | ✓               | ✓ | 8 |
| Maitrey et al,2014          | ✓     | ✓ | ✓    | ✓ | ✓ | ✓           | ? | ✓               | ✓ | 8 |
| Gupta et al,2015            | ✓     | ✓ | ✓    | ✓ | ✓ | ✓           | ? | ✓               | ✓ | 8 |
| Sadaf et al,2015            | ✓     | ✓ | ✓    | ? | - | ✓           | ? | ✓               | ✓ | 6 |
| Ifeorah et al, 2017         | ✓     | ✓ | ✓    | ✓ | ✓ | ✓           | ? | ✓               | ✓ | 8 |
| Adeola et al,2018           | ✓     | ✓ | ✓    | ✓ | ✓ | ✓           | ? | ✓               | ✓ | 8 |
| Kumar et al,2001            | ✓     | ✓ | ✓    | ✓ | ✓ | ✓           | ? | ✓               | ✓ | 8 |
| Hoad et al,2017             | ✓     | ✓ | ✓    | ✓ | ✓ | ✓           | ? | ✓               | ✓ | 8 |
| Harritshoj et al, 2016      | ✓     | ✓ | ✓    | ✓ | ✓ | ✓           | ? | ✓               | ✓ | 8 |
| Vollmer et al,2012          | ✓     | ✓ | ✓    | ✓ | ✓ | ✓           | ✓ | ✓               | ✓ | 9 |
| Arankalle et al,2002        | ✓     | ✓ | ✓    | ✓ | ✓ | ✓           | ✓ | ✓               | ✓ | 9 |
| La Fauci et al,2017         | ✓     | ✓ | ✓    | ✓ | ✓ | ✓           | ✓ | ✓               | ✓ | 9 |
| Minagi et al,2016           | ✓     | ✓ | ✓    | ✓ | ✓ | ✓           | ✓ | ✓               | ✓ | 9 |
| Riezebos-Brilman et al,2013 | ✓     | ✓ | ✓    | ✓ | ✓ | ✓           | ✓ | ✓               | ✓ | 9 |
| Rivero-Juarez et al,2019    | ✓     | ✓ | ✓    | ✓ | ✓ | ✓           | ✓ | ✓               | ✓ | 9 |
| Hewitt et al,2014           | ✓     | ✓ | ✓    | ✓ | ✓ | ✓           | ✓ | ✓               | ✓ | 9 |
| <b>Meaning of symbol</b>    | ✓ Yes |   | × No |   |   | ? Not clear |   | -Not applicable |   |   |

**Table S2. Distribution of HEV genotypes 1-4 in different countries.**

| Name                    | Country     | HEV-1 | HEV-2 | HEV-3 | HEV-4 | Subgroup                |
|-------------------------|-------------|-------|-------|-------|-------|-------------------------|
| Fischer et al, 2015     | Austria     |       |       | 7     |       | General population      |
| Dell'Amico et al, 2011  | Bolivia     |       |       | 4     |       | General population      |
| Passos et al, 2013      | Brazil      |       |       | 3     |       | Transplant              |
| Nouhin et al, 2016      | Cambodia    |       |       | 1     |       | General population      |
| Yamada et al, 2015      | Cambodia    |       |       | 1     | 1     | General population      |
| Halac et al, 2012       | Canada      |       |       | 5     |       | Transplant              |
| Zhu et al, 2008         | China       |       |       |       | 15    | General population      |
| Ren et al, 2014         | China       |       |       |       | 3     | General population      |
| Ma et al, 2010          | China       |       |       |       | 23    | General population      |
| Li et al, 2006          | China       | 1     |       |       | 23    | General population      |
| Li et al, 2019          | China       |       |       |       | 1     | General population      |
| Rui et al, 2018         | China       |       |       |       | 4     | General population      |
| Yu et al, 2009          | China       |       |       |       | 30    | General population      |
| Chen et al, 2019        | China       |       |       |       | 4     | General population      |
| Yang et al, 2014        | China       |       |       |       | 12    | General population      |
| Li et al, 2011          | China       |       |       |       | 1     | General population      |
| Li et al, 2014          | China       |       |       |       | 10    | General population      |
| Dong et al, 2007        | China       |       |       |       | 25    | General population      |
| Zhu et al, 2014         | China       | 5     |       |       | 72    | General population      |
| Zheng et al, 2006       | China       | 4     |       | 27    |       | Occupational            |
| Vallalba et al, 2012    | Cuba        |       |       | 3     |       | Occupational            |
| Harritshoj et al, 2016  | Denmark     |       |       | 2     |       | General population      |
| Kantala et al, 2009     | Finland     | 5     |       |       |       | Hepatitis               |
| Mansuy et al, 2004      | France      |       |       | 16    |       | General population      |
| Kaba et al, 2010        | France      |       |       | 1     |       | General population      |
| Kaba et al, 2011        | France      |       |       | 1     |       | HIV                     |
| Moal et al, 2012        | France      |       |       | 17    |       | Transplant              |
| Dremsek et al, 2012     | Germany     |       |       | 4     |       | Occupational population |
| Schielke et al, 2015    | Germany     |       |       | 1     |       | Occupational population |
| Hoerning et al, 2012    | Germany     |       |       | 3     |       | Transplant              |
| Pischke et al, 2010     | Germany     |       |       | 3     |       | Transplant              |
| Voller et al, 2012      | Germany     |       |       | 13    |       | General population      |
| Tripathy et al, 2019    | India       | 2     |       |       |       | General population      |
| Pathak et al, 2017      | India       | 22    |       |       |       | General population      |
| Persa et al, 2016       | Iran        | 7     |       |       |       | General population      |
| O'Riordan et al, 2016   | Ireland     |       |       | 3     |       | General population      |
| Lucarelli et al, 2016   | Italy       |       |       | 3     |       | General population      |
| Marcantonio et al, 2019 | Italy       |       |       | 1     |       | General population      |
| Inagaki et al, 2015     | Japan       |       |       | 2     |       | Transplant              |
| Fukuda et al, 2007      | Japan       |       |       | 8     | 3     | General population      |
| Sakata et al, 2008      | Japan       |       |       | 19    | 4     | General population      |
| Takahashi et al, 2010   | Japan       |       |       | 3     |       | General population      |
| Minagi et al, 2016      | Japan       |       |       | 36    |       | General population      |
| Ahn et al, 2005         | Korea       |       |       | 14    |       | General population      |
| Tsatsralt et al, 2016   | Mongolia    |       |       |       | 12    | Hepatitis               |
| Abe et al, 2006         | Nepal       | 3     |       |       |       | General population      |
| Shrestha et al, 2003    | Nepal       | 48    |       |       |       | Hepatitis               |
| Slot et al, 2013        | Netherlands |       |       | 16    |       | General population      |
| Hogema et al, 2016      | Netherlands |       |       | 17    |       | General population      |
| Suzan et al, 2012       | Netherlands |       |       | 11    |       | Transplant              |
| Brilman et al, 2012     | Netherlands |       |       | 10    |       | Transplant              |
| Koot et al, 2015        | Netherlands | 4     |       | 50    |       | Hepatitis               |
| Grabarczyk et al, 2018  | Poland      |       |       | 3     |       | General population      |



|                             |              |    |     |                    |
|-----------------------------|--------------|----|-----|--------------------|
| Anita et al, 2014           | Romania      |    | 6   | General population |
| Sauleda et al, 2014         | Spain        |    | 3   | General population |
| Jardi et al, 2012           | Spain        |    | 3   | HIV                |
| Foguena et al, 2011         | Switzerland  |    | 1   | HIV                |
| Intharasongkroh et al, 2018 | Thailand     |    | 3   | General population |
| Siripanyaphinyo et al, 2014 | Thailand     |    | 5   | Hepatitis          |
| Albetkova et al, 2007       | Turkmenistan | 25 |     | Hepatitis          |
| Harvala et al, 2018         | UK           |    | 479 | General population |
| Hewitt et al, 2014          | UK           |    | 79  | General population |
| Cleland et al, 2013         | UK           |    | 1   | General population |
| Thom et al, 2018            | UK           |    | 10  | General population |
| Ramalingam et al, 2013      | UK           |    | 7   | Hepatitis          |
| Mark et al, 2015            | USA          |    | 3   | HIV                |

---

**Table S3. Sensitivity analysis in seroepidemiology of anti-HEV IgG in general population**

| Study                      | Prevalence | Lower  | Upper  |
|----------------------------|------------|--------|--------|
| Chang et al, 2009          | 0.1242     | 0.1037 | 0.1464 |
| Geng et al, 2011           | 0.1242     | 0.1037 | 0.1464 |
| Yuan et al, 2017           | 0.1242     | 0.1036 | 0.1463 |
| Maria et al, 2006          | 0.1247     | 0.1041 | 0.1468 |
| Chen et al, 2019           | 0.1242     | 0.1037 | 0.1464 |
| Edward et al, 1997         | 0.1229     | 0.1025 | 0.1449 |
| Corwin et al, 1996         | 0.1244     | 0.1039 | 0.1466 |
| Hassan et al, 2013         | 0.1244     | 0.1039 | 0.1465 |
| Fatemeh et al, 2014        | 0.1236     | 0.1031 | 0.1456 |
| Guo et al, 2009            | 0.1239     | 0.1030 | 0.1464 |
| Halliday et al, 2014       | 0.1245     | 0.1039 | 0.1467 |
| Ahn et al, 2005            | 0.1244     | 0.1039 | 0.1466 |
| Azarkar et al, 2017        | 0.1241     | 0.1036 | 0.1462 |
| Boutrouille et al, 2007    | 0.1249     | 0.1043 | 0.1471 |
| Cainelli et al, 2018       | 0.1248     | 0.1042 | 0.1469 |
| Christensen et al, 2018    | 0.1239     | 0.1034 | 0.1460 |
| Abe et al, 2006            | 0.1239     | 0.1033 | 0.1460 |
| Baylis et al, 2012         | 0.1254     | 0.1096 | 0.1420 |
| Assarehzadegan et al, 2007 | 0.1245     | 0.1039 | 0.1466 |
| Dell'Amico et al, 2011     | 0.1246     | 0.1040 | 0.1467 |
| Yoon et al, 2014           | 0.1247     | 0.1042 | 0.1469 |
| Takahashi et al, 2004      | 0.1245     | 0.1040 | 0.1467 |
| Takahashi et al, 2010      | 0.1248     | 0.1041 | 0.1471 |
| O'Riordan et al, 2016      | 0.1248     | 0.1042 | 0.1469 |
| Spada et al, 2018          | 0.1246     | 0.1040 | 0.1469 |
| Nasrallah et al, 2017      | 0.1242     | 0.1036 | 0.1464 |
| Moaven et al, 1995         | 0.1249     | 0.1043 | 0.1471 |
| Zhuang et al, 2014         | 0.1241     | 0.1036 | 0.1463 |
| Nascimento et al, 2016     | 0.1243     | 0.1038 | 0.1465 |
| Takeda et al, 2010         | 0.1249     | 0.1043 | 0.1471 |
| Minuk et al, 2007          | 0.1249     | 0.1043 | 0.1471 |
| Nouhin et al, 2016         | 0.1240     | 0.1035 | 0.1461 |
| Verhoef et al, 2011        | 0.1250     | 0.1044 | 0.1472 |
| Castilho et al, 2017       | 0.1246     | 0.1040 | 0.1467 |
| Mooij et al, 2018          | 0.1239     | 0.1034 | 0.1461 |
| Lafeber et al, 2017        | 0.1240     | 0.1035 | 0.1462 |
| Yun et al, 2011            | 0.1246     | 0.1040 | 0.1467 |
| Olcay et al, 2003          | 0.1247     | 0.1041 | 0.1469 |
| Rapicetta et al, 1999      | 0.1250     | 0.1044 | 0.1472 |
| Nouhin et al, 2018         | 0.1237     | 0.1032 | 0.1458 |
| Slot et al, 2013           | 0.1240     | 0.1035 | 0.1462 |
| Straková et al, 2016       | 0.1248     | 0.1042 | 0.1469 |
| Wong et al, 2004           | 0.1243     | 0.1037 | 0.1464 |
| Meldal et al, 2013         | 0.1248     | 0.1042 | 0.1470 |
| Wenzel et al, 2014         | 0.1237     | 0.1032 | 0.1457 |
| Petrovi et al, 2014        | 0.1244     | 0.1038 | 0.1465 |
| Wang et al, 2017           | 0.1240     | 0.1034 | 0.1462 |
| Tripathy et al, 2018       | 0.1243     | 0.1037 | 0.1465 |
| Quintana et al, 2005       | 0.1248     | 0.1042 | 0.1469 |
| Taremi et al, 2007         | 0.1247     | 0.1041 | 0.1468 |
| Castilho et al, 2016       | 0.1246     | 0.1040 | 0.1467 |
| Vivek et al, 2010          | 0.1244     | 0.1038 | 0.1466 |
| Zhu et al, 2008            | 0.1240     | 0.1035 | 0.1462 |
| Sakata et al, 2008         | 0.1249     | 0.1043 | 0.1471 |
| Sadik et al, 2016          | 0.1238     | 0.1033 | 0.1458 |
| Mohebbi et al, 2012        | 0.1246     | 0.1040 | 0.1467 |
| Yang et al, 2014           | 0.1241     | 0.1036 | 0.1463 |
| Zhu et al, 2014            | 0.1238     | 0.1052 | 0.1436 |
| Thom et al, 2017           | 0.1248     | 0.1042 | 0.1470 |
| Mor et al, 2015            | 0.1245     | 0.1040 | 0.1467 |
| Villalba et al, 2014       | 0.1246     | 0.1040 | 0.1467 |
| Toyoda et al, 2008         | 0.1246     | 0.1040 | 0.1467 |
| Shrestha et al, 2016       | 0.1237     | 0.1032 | 0.1458 |
| Mohammad et al, 2017       | 0.1239     | 0.1034 | 0.1460 |
| Yamada et al, 2015         | 0.1243     | 0.1037 | 0.1464 |
| Vitral et al, 2014         | 0.1245     | 0.1039 | 0.1466 |
| Peng et al, 1995           | 0.1247     | 0.1041 | 0.1468 |
| Talarmin et al, 1997       | 0.1247     | 0.1041 | 0.1469 |
| Sauleda et al, 2014        | 0.1242     | 0.1036 | 0.1465 |
| Ren et al, 2013            | 0.1240     | 0.1034 | 0.1463 |
| Santos et al, 2002         | 0.1249     | 0.1044 | 0.1471 |
| Miller et al, 1998         | 0.1252     | 0.1046 | 0.1474 |
| Parsa et al, 2016          | 0.1247     | 0.1041 | 0.1468 |

|                             |        |         |        |
|-----------------------------|--------|---------|--------|
| Pittaras et al, 2014        | 0.1246 | 0.1040  | 0.1467 |
| Schreuder et al, 2016       | 0.1248 | 0.1042  | 0.1470 |
| Jahromi et al, 2013         | 0.1248 | 0.1042  | 0.1469 |
| Niederhauser et al, 2017    | 0.1242 | 0.1036  | 0.1464 |
| Teoharov et al, 2014        | 0.1246 | 0.1040  | 0.1467 |
| Bortoliero et al, 2006      | 0.1250 | 0.1044  | 0.1471 |
| Hewitt et al, 2018          | 0.1246 | 0.1040  | 0.1467 |
| Alberts et al, 2018         | 0.1249 | 0.1043  | 0.1471 |
| Grabarczyk et al, 2018      | 0.1236 | 0.1031  | 0.1457 |
| Gessoni et al, 1996         | 0.1249 | 0.1043  | 0.1471 |
| Fukuda et al, 2007          | 0.1248 | 0.1042  | 0.1469 |
| Fogeda et al, 2012          | 0.1251 | 0.1045  | 0.1472 |
| Fischer et al, 2014         | 0.1244 | 0.1039  | 0.1466 |
| Feng et al, 2018            | 0.1231 | 0.1027  | 0.1451 |
| Fearon et al, 2017          | 0.1247 | 0.1041  | 0.1469 |
| Harvala et al, 2018         | 0.1246 | 0.1040  | 0.1468 |
| Cleland et al, 2013         | 0.1248 | 0.1042  | 0.1470 |
| Cangin et al, 2018          | 0.1248 | 0.1042  | 0.1470 |
| Ditah et al, 2014           | 0.1248 | 0.1041  | 0.1470 |
| Paula et al, 2001           | 0.1248 | 0.1043  | 0.1470 |
| Goncales et al, 2000        | 0.1248 | 0.1042  | 0.1469 |
| Cai et al, 2016             | 0.1234 | 0.1029  | 0.1454 |
| Chiu et al, 2013            | 0.1240 | 0.1035  | 0.1461 |
| Dimeglio et al, 2018        | 0.1247 | 0.1041  | 0.1468 |
| Ding et al, 2003            | 0.1249 | 0.1043  | 0.1471 |
| Chan et al, 2017            | 0.1239 | 0.1034  | 0.1460 |
| Arif et al, 1994            | 0.1245 | 0.1039  | 0.1467 |
| Abdelaal et al, 1995        | 0.1243 | 0.1038  | 0.1465 |
| Amarapurkar et al, 2008     | 0.1238 | 0.1033  | 0.1459 |
| Anita et al, 2014           | 0.1244 | 0.1038  | 0.1465 |
| Grabow et al, 1994          | 0.1250 | 0.1044  | 0.1471 |
| Hardtke et al, 2018         | 0.1242 | 0.1036  | 0.1463 |
| Ataei et al, 2007           | 0.1249 | 0.1043  | 0.1470 |
| Hesamizadeh et al, 2015     | 0.1246 | 0.1040  | 0.1468 |
| Hogema et al, 2016          | 0.1241 | 0.1036  | 0.1462 |
| Hickey et al, 2016          | 0.1246 | 0.1041  | 0.1468 |
| Houcine et al, 2012         | 0.1248 | 0.1042  | 0.1469 |
| Jahromi et al, 2013         | 0.1248 | 0.1042  | 0.1469 |
| Sepanlou et al, 2010        | 0.1247 | 0.1041  | 0.1468 |
| Mitsui et al, 2005          | 0.1250 | 0.1044  | 0.1471 |
| Adesina et al, 2009         | 0.1244 | 0.1039  | 0.1466 |
| Bernal et al, 1995          | 0.1250 | 0.1044  | 0.1471 |
| Pujol et al, 1994           | 0.1249 | 0.1043  | 0.1470 |
| Ricco et al, 2016           | 0.1248 | 0.1042  | 0.1470 |
| Puttini et al, 2015         | 0.1246 | 0.1040  | 0.1467 |
| Pavia et al, 1998           | 0.1251 | 0.1045  | 0.1473 |
| Zuin et al, 2016            | 0.1245 | 0.1039  | 0.1467 |
| Scotto et al, 2012          | 0.1250 | 0.1044  | 0.1472 |
| Raooft et al, 2012          | 0.1247 | 0.1041  | 0.1468 |
| Rahman et al, 2014          | 0.1240 | 0.1034  | 0.1461 |
| Poovorawan et al, 1996      | 0.1247 | 0.1042  | 0.1469 |
| Sabato et al, 2017          | 0.1250 | 0.1044  | 0.1472 |
| Chen et al, 2012            | 0.1242 | 0.1035  | 0.1466 |
| Madden et al, 2016          | 0.1240 | 0.1035  | 0.1461 |
| Love et al, 2018            | 0.1250 | 0.1044  | 0.1471 |
| Lopes et al, 2017           | 0.1241 | 0.1035  | 0.1462 |
| Mansuy et al, 2016          | 0.1242 | 0.1035  | 0.1464 |
| Karetny et al, 1995         | 0.1249 | 0.1043  | 0.1471 |
| Lucarelli et al, 2016       | 0.1235 | 0.1030  | 0.1456 |
| Lange et al, 2016           | 0.1244 | 0.1039  | 0.1466 |
| Kotwal et al, 2014          | 0.1243 | 0.1037  | 0.1465 |
| Liang et al, 2014           | 0.1237 | 0.1032  | 0.1458 |
| Mateos et al, 1998          | 0.1249 | 0.1043  | 0.1470 |
| Marcantonio et al, 2018     | 0.1248 | 0.1042  | 0.1469 |
| Karetnyi et al, 1999        | 0.1248 | 0.1042  | 0.1469 |
| Lanini et al, 2015          | 0.1248 | 0.1042  | 0.1469 |
| Johargy et al, 2013         | 0.1243 | [0.1037 | 0.1464 |
| Jia et al, 2014             | 0.1241 | 0.1034  | 0.1465 |
| Ma et al, 2010              | 0.1243 | 0.1037  | 0.1464 |
| Kaufmann et al, 2011        | 0.1248 | 0.1042  | 0.1469 |
| Mansuy et al, 2004          | 0.1245 | 0.1040  | 0.1467 |
| Mansuy et al, 2015          | 0.1237 | 0.1032  | 0.1458 |
| Izopet et al, 2015          | 0.1237 | 0.1032  | 0.1457 |
| Li et al, 2011              | 0.1237 | 0.1032  | 0.1458 |
| Konomi et al, 1999          | 0.1244 | 0.1038  | 0.1465 |
| Li et al, 2014              | 0.1245 | 0.1039  | 0.1466 |
| Juhl et al, 2017            | 0.1244 | 0.1038  | 0.1465 |
| Katiyar et al, 2018         | 0.1232 | 0.1028  | 0.1453 |
| Intharasongkroh et al, 2019 | 0.1253 | 0.1047  | 0.1475 |



|                          |        |        |        |
|--------------------------|--------|--------|--------|
| Juhl et al, 2014         | 0.1247 | 0.1041 | 0.1469 |
| Kamel et al, 1995        | 0.1243 | 0.1038 | 0.1465 |
| Nagler et al, 2014       | 0.1244 | 0.1038 | 0.1465 |
| Langer et al, 1997       | 0.1251 | 0.1045 | 0.1473 |
| Lee et al, 1993          | 0.1248 | 0.1042 | 0.1470 |
| Lavanchy et al, 1994     | 0.1248 | 0.1042 | 0.1470 |
| Ibarra et al, 1994       | 0.1243 | 0.1038 | 0.1464 |
| Liu et al, 2019          | 0.1239 | 0.1033 | 0.1461 |
| Mahrt et al, 2018        | 0.1242 | 0.1036 | 0.1463 |
| Kuniholm et al, 2009     | 0.1242 | 0.1034 | 0.1466 |
| Krumbholz et al, 2011    | 0.1244 | 0.1038 | 0.1465 |
| Khounvisith et al, 2018  | 0.1243 | 0.1037 | 0.1464 |
| Krumbholz et al, 2014    | 0.1245 | 0.1039 | 0.1466 |
| Jeggli et al, 2015       | 0.1249 | 0.1043 | 0.1470 |
| Kantala et al, 2015      | 0.1246 | 0.1040 | 0.1467 |
| Kang et al, 2017         | 0.1242 | 0.1037 | 0.1463 |
| Korzeniewski et al, 2018 | 0.1248 | 0.1042 | 0.1469 |
| Li et al, 2006           | 0.1236 | 0.1031 | 0.1457 |
| Labrique et al, 2009     | 0.1242 | 0.1036 | 0.1463 |
| Jablonka et al, 2017     | 0.1242 | 0.1037 | 0.1463 |
| Matins et al, 2014       | 0.1248 | 0.1042 | 0.1469 |
| Jahanbakhsh et al, 2017  | 0.1241 | 0.1036 | 0.1462 |
| Kaba et al, 2010         | 0.1245 | 0.1039 | 0.1466 |
| Chironna et al, 1999     | 0.1249 | 0.1043 | 0.1470 |
| Rapicetta et al, 1999    | 0.1245 | 0.1039 | 0.1466 |
| Azman et al, 2017        | 0.1229 | 0.1025 | 0.1449 |
| Lachish et al, 2013      | 0.1252 | 0.1046 | 0.1473 |
| Esquivel et al, 2014     | 0.1238 | 0.1033 | 0.1459 |
| Cui et al, 2016          | 0.1242 | 0.1036 | 0.1463 |
| Schielke et al, 2015     | 0.1242 | 0.1037 | 0.1463 |
| Nübling et al, 2002      | 0.1248 | 0.1043 | 0.1470 |
| Todys et al, 2015        | 0.1242 | 0.1037 | 0.1464 |
| Meadler et al, 2008      | 0.1249 | 0.1044 | 0.1471 |
| Tabili et al, 2013       | 0.1242 | 0.1036 | 0.1463 |
| Pilakasiri et al, 2009   | 0.1245 | 0.1039 | 0.1466 |
| Ghorbani et al, 2007     | 0.1251 | 0.1045 | 0.1472 |
| Bura et al, 2018         | 0.1250 | 0.1044 | 0.1472 |
| Dremsek et al, 2012      | 0.1244 | 0.1038 | 0.1465 |
| Eick et al, 2010         | 0.1251 | 0.1045 | 0.1472 |
| Gambel et al, 1998       | 0.1242 | 0.1037 | 0.1463 |
| Alecci et al, 1997       | 0.1251 | 0.1045 | 0.1472 |
| Chaussade et al, 2013    | 0.1241 | 0.1035 | 0.1462 |
| Whiters et al, 2002      | 0.1249 | 0.1044 | 0.1471 |
| Zeng et al, 2014         | 0.1248 | 0.1042 | 0.1469 |
| Yu et al, 2009           | 0.1242 | 0.1036 | 0.1464 |
| Teixeira et al, 2017     | 0.1244 | 0.1039 | 0.1466 |
| Widasari et al, 2013     | 0.1247 | 0.1042 | 0.1469 |
| Olsen et al, 2006        | 0.1246 | 0.1040 | 0.1467 |
| Zhang et al, 2017        | 0.1237 | 0.1032 | 0.1458 |
| Bouwknegt et al, 2008    | 0.1250 | 0.1044 | 0.1472 |
| Drobeniuc et al, 2001    | 0.1241 | 0.1036 | 0.1462 |
| Galiana et al, 2008      | 0.1248 | 0.1042 | 0.1470 |
| Dalton et al, 2017       | 0.1250 | 0.1044 | 0.1471 |
| Cheng et al, 2007        | 0.1244 | 0.1038 | 0.1465 |
| Pathak et al, 2018       | 0.1241 | 0.1036 | 0.1462 |
| Sheikh et al, 2002       | 0.1233 | 0.1028 | 0.1453 |
| Chow et al, 1996         | 0.1244 | 0.1039 | 0.1466 |
| Colak et al, 2002        | 0.1251 | 0.1045 | 0.1473 |
| Cong et al, 2014         | 0.1241 | 0.1036 | 0.1463 |
| Terzic et al, 2009       | 0.1247 | 0.1042 | 0.1469 |
| Bayhan et al, 2016       | 0.1248 | 0.1042 | 0.1470 |
| Abe et al, 2004          | 0.1243 | 0.1037 | 0.1464 |
| Aboulata et al, 2005     | 0.1241 | 0.1036 | 0.1462 |
| Achwan et al, 2007       | 0.1247 | 0.1042 | 0.1469 |
| Atabek et al, 2004       | 0.1247 | 0.1042 | 0.1469 |
| Buti et al, 2008         | 0.1248 | 0.1042 | 0.1470 |
| Cevahir et al, 2013      | 0.1245 | 0.1039 | 0.1466 |
| Davaalkham et al, 2009   | 0.1251 | 0.1045 | 0.1473 |
| Ekanem et al, 2015       | 0.1247 | 0.1041 | 0.1468 |
| Gandolfo et al, 2003     | 0.1251 | 0.1045 | 0.1473 |
| Goto et al, 2006         | 0.1249 | 0.1043 | 0.1471 |
| Hasan et al, 2016        | 0.1241 | 0.1035 | 0.1462 |
| Kaya et al, 2007         | 0.1252 | 0.1046 | 0.1473 |
| Krumbholz et al, 2014    | 0.1251 | 0.1045 | 0.1472 |
| Lin et al, 2004          | 0.1249 | 0.1043 | 0.1471 |
| Mathur et al, 2001       | 0.1241 | 0.1035 | 0.1462 |
| Meng et al, 2015         | 0.1245 | 0.1039 | 0.1467 |
| Mohanavalli et al, 2002  | 0.1246 | 0.1040 | 0.1468 |
| Oliveira et al, 2017     | 0.1251 | 0.1045 | 0.1472 |

|                          |        |        |        |
|--------------------------|--------|--------|--------|
| Sencan et al, 2003       | 0.1247 | 0.1041 | 0.1468 |
| Shamsizadeh et al, 2009  | 0.1246 | 0.1041 | 0.1468 |
| Sidal et al, 2001        | 0.1250 | 0.1044 | 0.1471 |
| Bira et al, 2007         | 0.1251 | 0.1045 | 0.1473 |
| Hau et al, 1999          | 0.1249 | 0.1043 | 0.1471 |
| Toole et al, 2006        | 0.1239 | 0.1034 | 0.1460 |
| Saffar et al, 2009       | 0.1250 | 0.1044 | 0.1471 |
| Bawazir et al, 2010      | 0.1245 | 0.1040 | 0.1467 |
| Dong et al, 2007         | 0.1243 | 0.1036 | 0.1466 |
| Lu et al, 2009           | 0.1243 | 0.1037 | 0.1465 |
| Fix et al, 2000          | 0.1237 | 0.1031 | 0.1458 |
| Ijaz et al, 2009         | 0.1244 | 0.1039 | 0.1466 |
| Rey et al, 1997          | 0.1250 | 0.1044 | 0.1472 |
| Munoz et al, 1999        | 0.1245 | 0.1039 | 0.1467 |
| Héctor et al, 2017       | 0.1251 | 0.1045 | 0.1473 |
| Li et al, 2019           | 0.1244 | 0.1038 | 0.1465 |
| Lee et al, 2013          | 0.1250 | 0.1044 | 0.1471 |
| Serkan et al, 2005       | 0.1247 | 0.1041 | 0.1468 |
| Christophe et al, 2004   | 0.1247 | 0.1041 | 0.1468 |
| Dorcas et al, 2018       | 0.1245 | 0.1039 | 0.1466 |
| Rui et al, 2018          | 0.1242 | 0.1037 | 0.1463 |
| Maria et al, 2010        | 0.1249 | 0.1043 | 0.1470 |
| Zakieh et al, 2013       | 0.1249 | 0.1043 | 0.1470 |
| Sonia et al, 2006        | 0.1226 | 0.1023 | 0.1444 |
| Niguse et al, 2018       | 0.1237 | 0.1032 | 0.1457 |
| Caron et al, 2008        | 0.1244 | 0.1039 | 0.1466 |
| Caron et al, 2012        | 0.1247 | 0.1041 | 0.1469 |
| Sandro et al, 2017       | 0.1247 | 0.1041 | 0.1468 |
| Cosme et al, 2014        | 0.1248 | 0.1042 | 0.1469 |
| Cevrioglu et al, 2004    | 0.1245 | 0.1039 | 0.1466 |
| Farshadpour et al, 2018  | 0.1247 | 0.1041 | 0.1469 |
| Gad et al, 2011          | 0.1233 | 0.1028 | 0.1454 |
| Adjei et al, 2009        | 0.1246 | 0.1040 | 0.1467 |
| Huang et al, 2013        | 0.1246 | 0.1040 | 0.1467 |
| Paschale et al, 2016     | 0.1242 | 0.1036 | 0.1463 |
| Alizadeh et al, 2016     | 0.1249 | 0.1043 | 0.1471 |
| Abebe et al, 2017        | 0.1239 | 0.1034 | 0.1460 |
| Traore et al, 2012       | 0.1239 | 0.1034 | 0.1460 |
| Aubry et al, 1997        | 0.1244 | 0.1039 | 0.1465 |
| Gambel et al, 1998       | 0.1245 | 0.1039 | 0.1466 |
| Zhang et al, 2015        | 0.1242 | 0.1036 | 0.1464 |
| Kyvermitakis et al, 2015 | 0.1245 | 0.1040 | 0.1467 |
| Tashale et al, 2015      | 0.1247 | 0.1040 | 0.1469 |
| Xu et al, 2013           | 0.1243 | 0.1037 | 0.1464 |
| Stramer et al, 2015      | 0.1244 | 0.1039 | 0.1466 |
| Meng et al, 2001         | 0.1243 | 0.1037 | 0.1464 |
| Esquivel et al, 2015     | 0.1247 | 0.1041 | 0.1468 |
| Esquivel et al, 2015     | 0.1248 | 0.1042 | 0.1469 |
| Perez et al, 1996        | 0.1248 | 0.1042 | 0.1470 |
| Wassaf et al, 2014       | 0.1248 | 0.1042 | 0.1470 |
| Munne et al, 2014        | 0.1244 | 0.1038 | 0.1465 |
| Bartoloni et al, 1999    | 0.1247 | 0.1041 | 0.1468 |
| Leon et al, 1999         | 0.1242 | 0.1037 | 0.1463 |
| Trinta et al, 2001       | 0.1251 | 0.1045 | 0.1473 |
| Lemos et al, 2000        | 0.1250 | 0.1044 | 0.1472 |

**Table S4. Manufactures of ELISA assays used in general population.**

| Study                | year | manufactures                       |
|----------------------|------|------------------------------------|
| Chang et al          | 2009 | Wantai                             |
| Geng et al           | 2011 | wantai                             |
| Yuan et al           | 2017 | Wantai                             |
| Maria et al          | 2006 | Biokit                             |
| Chen et al           | 2019 | Wantai                             |
| Edward et al         | 1997 | Diagnostic<br>Biotechnology        |
| Corwin et al         | 1996 | Abbott Laboratories                |
| Hassan et al         | 2013 | Dia.Pro                            |
| Fatemeh et al        | 2014 | Dia.Pro                            |
| Guo et al            | 2009 | Wantai                             |
| Halliday et al       | 2014 | Wantai                             |
| Ahn et al            | 2005 | Genelabs Diagnostics               |
| Azarkar et al        | 2017 | Delavara Company                   |
| Boutrouille et al    | 2007 | Genelabs Diagnostics               |
| Cainelli et al       | 2018 | Dia.Pro                            |
| Christensen et al    | 2018 | Unknown                            |
| Abe et al            | 2006 | In-house assay                     |
| Baylis et al         | 2012 | Wantai                             |
| Assarehzadegan et al | 2007 | Biokit                             |
| Dell'Amico et al     | 2011 | Dia.Pro                            |
| Yoon et al           | 2014 | Wantai                             |
| Takahashi et al      | 2004 | In-house assay                     |
| Takahashi et al      | 2010 | In-house assay                     |
| O'Riordan et al      | 2016 | Wantai                             |
| Spada et al          | 2018 | Wantai                             |
| Nasrallah et al      | 2017 | Wantai                             |
| Moaven et al         | 1995 | Genelabs Diagnostics               |
| Zhuang et al         | 2014 | Pierce                             |
| Nascimento et al     | 2016 | Mikrogen                           |
| Takeda et al         | 2010 | Cosmic corporation                 |
| Minuk et al          | 2007 | Genelabs Diagnostics               |
| Nouhin et al         | 2016 | Wantai                             |
| Verhoef et al        | 2011 | MP Diagnostics                     |
| Castilho et al       | 2017 | Wantai                             |
| Mooij et al          | 2018 | Wantai                             |
| Lafeber et al        | 2017 | Wantai                             |
| Yun et al            | 2011 | Dia.Pro                            |
| Olcay et al          | 2003 | Genelabs Diagnostics               |
| Rapicetta et al      | 1999 | Abbott Laboratories                |
| Nouhin et al         | 2018 | Wantai                             |
| Slot et al           | 2013 | Wantai                             |
| Straková et al       | 2016 | Dia.Pro                            |
| Wong et al           | 2004 | GeneLabs Diagnostics               |
| Meldal et al         | 2013 | Wantai                             |
| Wenzel et al         | 2014 | Wantai                             |
| Petrovi et al        | 2014 | In-house assay                     |
| Wang et al           | 2017 | Wantai                             |
| Tripathy et al       | 2018 | Genelabs<br>Diagnostic/Wantai      |
| Quintana et al       | 2005 | Unknown                            |
| Taremi et al         | 2007 | Dia.Pro                            |
| Castilho et al       | 2016 | Wantai                             |
| Vivek et al          | 2010 | MP Bio                             |
| Zhu et al            | 2008 | Wantai                             |
| Sakata et al         | 2008 | Cosmic Corporation                 |
| Sadik et al          | 2016 | Wantai                             |
| Mohebbi et al        | 2012 | Dia.Pro                            |
| Yang et al           | 2014 | Wantai                             |
| Zhu et al            | 2014 | Wantai                             |
| Thom et al           | 2017 | Wantai                             |
| Mor et al            | 2015 | Diagnostic Systems                 |
| Villalba et al       | 2014 | Cavendish                          |
| Toyoda et al         | 2008 | In-house assay                     |
| Shrestha et al       | 2016 | Wantai                             |
| Mohammad et al       | 2017 | Fortress Diagnostics               |
| Yamada et al         | 2015 | Institute of Immunology<br>Company |
| Vitral et al         | 2014 | Mikrogen                           |
| Peng et al           | 1995 | Diagnostic Biotechnolgy            |
| Talarmin et al       | 1997 | Abbott Laboratories                |
| Sauleda et al        | 2014 | Wantai                             |
| Ren et al            | 2013 | Diagnostic<br>Biotechnology        |
| Santos et al         | 2002 | Abbott Laboratories                |
| Miller et al         | 1998 | Abbott Laboratories                |



|                    |      |                                   |
|--------------------|------|-----------------------------------|
| Parsa et al        | 2016 | Dia.Pro                           |
| Pittaras et al     | 2014 | Adaltis                           |
| Schreuder et al    | 2016 | Wantai                            |
| Jahromi et al      | 2013 | Unknown                           |
| Niederhauser et al | 2017 | Wantai                            |
| Teoharov et al     | 2014 | Dia.Pro                           |
| Bortoliero et al   | 2006 | Abbott Laboratories               |
| Hewitt et al       | 2018 | Wantai                            |
| Alberts et al      | 2018 | Wantai                            |
| Grabarczyk et al   | 2018 | Wantai                            |
| Gessoni et al      | 1996 | Abbott Laboratories               |
| Fukuda et al       | 2007 | Unknown                           |
| Fogeda et al       | 2012 | Mikrogen GmbH                     |
| Fischer et al      | 2014 | Wantai                            |
| Feng et al         | 2018 | Wantai                            |
| Fearon et al       | 2017 | Wantai                            |
| Harvala et al      | 2018 | Wantai                            |
| Cleland et al      | 2013 | Wantai                            |
| Cangin et al       | 2018 | Soronno                           |
| Ditah et al        | 2014 | Soronno                           |
| Paula et al        | 2001 | Organon Teknika                   |
| Goncales et al     | 2000 | Abbott Laboratories               |
| Cai et al          | 2016 | Wantai                            |
| Chiu et al         | 2013 | Biotech Laboratories              |
| Dimeglio et al     | 2018 | Wantai                            |
| Ding et al         | 2003 | In-house assay                    |
| Chan et al         | 2017 | Unknown                           |
| Arif et al         | 1994 | Abbott Laboratories               |
| Abdelaal et al     | 1995 | Unknown                           |
| Amarapurkar et al  | 2008 | Unknown                           |
| Anita et al        | 2014 | MP Biomedicals                    |
| Grabow et al       | 1994 | Unknown                           |
| Hardtke et al      | 2018 | Wantai                            |
| Ataei et al        | 2007 | Dia.Pro                           |
| Hesamizadeh et al  | 2015 | Dia.Pro                           |
| Hogema et al       | 2016 | Wantai                            |
| Hickey et al       | 2016 | Wantai                            |
| Houcine et al      | 2012 | MP Diagnostics                    |
| Jahromi et al      | 2013 | Dia.Pro                           |
| Sepanlou et al     | 2010 | Dia.Pro                           |
| Mitsui et al       | 2005 | Genelabs Diagnostics              |
| Adesina et al      | 2009 | Dia.Pro                           |
| Bernal et al       | 1995 | Abbott Laboratories               |
| Pujol et al        | 1994 | Abbott Laboratories               |
| Ricco et al        | 2016 | Wantai/ Dia.Pro                   |
| Puttini et al      | 2015 | Adaltis                           |
| Pavia et al        | 1998 | International<br>Immunodiagnosics |
| Zuin et al         | 2016 | Dia.Pro                           |
| Scotto et al       | 2012 | Dia.Pro                           |
| Raoofi et al       | 2012 | Unknown                           |
| Rahman et al       | 2014 | Institute of Immunology           |
| Poovorawan et al   | 1996 | Genelabs Diagnostics              |
| Sabato et al       | 2017 | Bio-Chain Institute               |
| Chen et al         | 2012 | In-house assay                    |
| Madden et al       | 2016 | Wantai                            |
| Love et al         | 2018 | Wantai/Dia.Pro                    |
| Lopes et al        | 2017 | Fortress Diagnostics              |
| Mansuy et al       | 2016 | Wantai                            |
| Karetny et al      | 1995 | Unknown                           |
| Lucarelli et al    | 2016 | Wantai                            |
| Lange et al        | 2016 | Wantai                            |
| Kotwal et al       | 2014 | Unknown                           |
| Liang et al        | 2014 | Wantai                            |
| Mateos et al       | 1998 | Abbott Laboratories               |
| Marcantonio et al  | 2018 | Wantai                            |
| Karetnyi et al     | 1999 | In-house assay                    |
| Lanini et al       | 2015 | Dia.Pro                           |
| Johargy et al      | 2013 | Bioelisa                          |
| Jia et al          | 2014 | MP Diagnostics                    |
| Ma et al           | 2010 | Wantai                            |
| Kaufmann et al     | 2011 | MP Biomedicals                    |
| Mansuy et al       | 2004 | Abbott Laboratories               |
| Mansuy et al       | 2015 | Wantai                            |
| Izopet et al       | 2015 | Wantai                            |
| Li et al           | 2011 | Wantai                            |
| Konomi et al       | 1999 | In-house assay                    |
| Li et al           | 2014 | Wantai                            |
| Juhl et al         | 2017 | Wantai                            |

|                       |      |                                |
|-----------------------|------|--------------------------------|
| Katiyar et al         | 2018 | Wantai                         |
| Intharasongkroh et al | 2019 | Euroimmun/Wantai               |
| Juhl et al            | 2014 | Wantai                         |
| Kamel et al           | 1995 | Abbott Laboratories            |
| Nagler et al          | 2014 | Fortress Diagnostics           |
| Langer et al          | 1997 | Abbott Laboratories            |
| Lee et al             | 1993 | Genelabs Diagnostics           |
| Lavanchy et al        | 1994 | Abbott Laboratories            |
| Ibarra et al          | 1994 | Abbott Laboratories            |
| Liu et al             | 2019 | Unknown                        |
| Mahrt et al           | 2018 | Wantai                         |
| Kuniholm et al        | 2009 | In-house assay                 |
| Krumbholz et al       | 2011 | Mikrogen GmbH                  |
| Khounvisith et al     | 2018 | Euroimmun                      |
| Krumbholz et al       | 2014 | Mikrogen GmbH                  |
| Jeggli et al          | 2015 | Abbott Laboratories            |
| Kantala et al         | 2015 | Mikrogen GmbH                  |
| Kang et al            | 2017 | Wantai                         |
| Korzeniewski et al    | 2018 | Mikrogen                       |
| Li et al              | 2006 | Wantai                         |
| Labrique et al        | 2009 | In-house assay                 |
| Jablonka et al        | 2017 | Wantai                         |
| Matins et al          | 2014 | Mikrogen GmbH                  |
| Jahanbakhsh et al     | 2017 | Dia.Pro                        |
| Kaba et al            | 2010 | Adaltis                        |
| Chironna et al        | 1999 | Nuclear Laser Medicine         |
| Rapicetta et al       | 1999 | DSI                            |
| Azman et al           | 2017 | Wantai                         |
| Lachish et al         | 2013 | Abbott Laboratories            |
| Esquivel et al        | 2014 | Dia.Pro                        |
| Cui et al             | 2016 | Wantai                         |
| Schielke et al        | 2015 | Mikrogen GmbH                  |
| Nübling et al         | 2002 | Unknown                        |
| Todys et al           | 2015 | Microgen                       |
| Meador et al          | 2008 | MP Biomedical                  |
| Tabili et al          | 2013 | Wantai                         |
| Pilakasiri et al      | 2009 | In-house assay                 |
| Ghorbani et al        | 2007 | Dia.Pro                        |
| Bura et al            | 2018 | Euroimmun                      |
| Dremsek et al         | 2012 | In-house assay                 |
| Eick et al            | 2010 | WRAIR                          |
| Gambel et al          | 1998 | Genelabs Diagnostics           |
| Alecci et al          | 1997 | Abbott Laboratories            |
| Chaussade et al       | 2013 | MP Biomedicals                 |
| Whiters et al         | 2002 | Genelabs Diagnostics           |
| Zeng et al            | 2014 | Wantai                         |
| Yu et al              | 2009 | Wantai                         |
| Teixeira et al        | 2017 | Mikrogen                       |
| Widasari et al        | 2013 | MP Biomedicals                 |
| Olsen et al           | 2006 | Abbott Laboratories            |
| Zhang et al           | 2017 | Wantai                         |
| Bouwknegt et al       | 2008 | Abbott/Genelabs<br>Diagnostics |
| Drobeniuc et al       | 2001 | Unknown                        |
| Galiana et al         | 2008 | Mikrogen                       |
| Dalton et al          | 2017 | Wantai                         |
| Cheng et al           | 2007 | Genelabs Diagnostics           |
| Pathak et al          | 2018 | MP Diagnostics                 |
| Sheikh et al          | 2002 | In-house assay                 |
| Chow et al            | 1996 | Genelabs Diagnostics           |
| Colak et al           | 2002 | Genelabs Diagnostics           |
| Cong et al            | 2014 | Wantai                         |
| Terzic et al          | 2009 | Dia.Pro                        |
| Bayhan et al          | 2016 | Dia.Pro                        |
| Abe et al             | 2004 | In-house assay                 |
| Aboulata et al        | 2004 | Unknown                        |
| Achwan et al          | 2007 | In-house assay                 |
| Atabek et al          | 2004 | Unknown                        |
| Buti et al            | 2008 | Biokit                         |
| Cevahir et al         | 2013 | BLK diagnostics                |
| Davaalkham et al      | 2009 | In-house assay                 |
| Ekanem et al          | 2015 | Springfield Township           |
| Gandolfo et al        | 2003 | Abbott Laboratories            |
| Goto et al            | 2006 | Cosmic Corporation             |
| Hasan et al           | 2016 | Adaltis/MP Diagnostics         |
| Kaya et al            | 2007 | Genelabs Diagnostic            |
| Krumbholz et al       | 2014 | Mikrogen                       |
| Lin et al             | 2004 | Abbott Laboratories            |
| Mathur et al          | 2001 | unknown                        |

|                    |      |                      |
|--------------------|------|----------------------|
| Meng et al         | 2015 | Wantai               |
| Mohanavalli et al  | 2002 | Millipore            |
| Oliveira et al     | 2017 | Mikrogen             |
| Sencan et al       | 2003 | Giuliana Diagnostica |
| Shamsizadeh et al  | 2009 | Biokit               |
| Sidal et al        | 2001 | Unknown              |
| Bira et al         | 2007 | In-house assay       |
| Hau et al          | 1999 | Abbott Laboratories  |
| Toole et al        | 2006 | Wantai               |
| Saffar et al       | 2009 | Dia.Pro              |
| Bawazir et al      | 2010 | MP Diagnostic        |
| Dong et al         | 2007 | In-house assay       |
| Lu et al           | 2009 | Wantai               |
| Fix et al          | 2000 | Abbott Laboratories  |
| Ijaz et al         | 2009 | Fortress Diagnostics |
| Rey et al          | 1997 | Abbott Laboratories  |
| Munoz et al        | 1999 | Abbott Laboratories  |
| Héctor et al       | 2017 | Euroimmun            |
|                    |      | Medizinische         |
| Li et al           | 2019 | Wantai               |
| Lee et al          | 2013 | Wantai               |
| Serkan et al       | 2005 | Global Diagnostics   |
| Christophe et al   | 2004 | Wantai               |
| Dorcas et al       | 2018 | Innovita             |
| Rui et al          | 2018 | Wantai               |
| Maria et al        | 2010 | Dia.Pro              |
| Zakieh et al       | 2013 | Dia.Pro              |
| Sonia et al        | 2006 | NIH in-house EIA     |
| Niguse et al       | 2018 | Wantai               |
| Caron et al        | 2008 | Gebelabs Diagnostic  |
| Caron et al        | 2012 | Gebelabs Diagnostic  |
| Sandro et al       | 2017 | Dia.Pro              |
| Cosme et al        | 2014 | Dia.Pro              |
| Cevrioglu et al    | 2004 | Virotech GmbH        |
| Farshadpour et al  | 2018 | Dia.Pro              |
| Gad et al          | 2011 | Gebelabs Diagnostic  |
|                    |      | International        |
| Adjei et al        | 2009 | Immunodiagnosics     |
|                    |      | Unknown              |
| Huang et al        | 2013 | Dia.Pro              |
| Paschale et al     | 2016 | Dia.Pro              |
| Alizadeh et al     | 2016 | Dia.Pro              |
| Abebe et al        | 2017 | Wantai               |
| Traore et al       | 2012 | Dia.Pro              |
| Aubry et al        | 1997 | Unknown              |
| Gambel et al       | 1998 | Unknown              |
| Zhang et al        | 2015 | Unknown              |
| Kyvernitakis et al | 2015 | Mikrogen             |
| Tashale et al      | 2015 | DSI                  |
| Xu et al           | 2013 | Wantai               |
| Stramer et al      | 2015 | Unknown              |
| Meng et al         | 2001 | In-house assay       |
| Esquivel et al     | 2015 | Dia.Pro              |
| Esquivel et al     | 2015 | Dia.Pro              |
| Perez et al        | 1996 | Abbott Laboratories  |
| Wassaf et al       | 2014 | Dia.Pro              |
| Munne et al        | 2014 | Dia.Pro              |
| Bartoloni et al    | 1999 | Abbott Laboratories  |
| Leon et al         | 1999 | Abbott Laboratories  |
| Trinta et al       | 2001 | Abbott Laboratories  |
| Lemos et al        | 2000 | Unknown              |
